# Supplementary material for: Volume–outcome relationship in transcatheter aortic valve implantations in Germany 2008–2014: a secondary data analysis of electronic health records
Source: PubMed Central journal article supplement — BMJ Open. 2018 Jul 28;8(7):e020204. doi: 10.1136/bmjopen-2017-020204 (PMC6067393; doi:10.1136/bmjopen-2017-020204), 2018-07-28
Supplement: bmjopen-2017-020204.draft_revisions.pdf [file bmjopen-2017-020204.draft_revisions.pdf]

# BMJ Open

BMJ Open is committed to open peer review. As part of this commitment we make the peer review history of every article we publish publicly available.

When an article is published we post the peer reviewers' comments and the authors' responses online. We also post the versions of the paper that were used during peer review. These are the versions that the peer review comments apply to.

The versions of the paper that follow are the versions that were submitted during the peer review process. They are not the versions of record or the final published versions. They should not be cited or distributed as the published version of this manuscript.

BMJ Open is an open access journal and the full, final, typeset and author-corrected version of record of the manuscript is available on our site with no access controls, subscription charges or pay-per-view fees (<http://bmjopen.bmj.com>).

If you have any questions on BMJ Open's open peer review process please email [info.bmjopen@bmj.com](mailto:info.bmjopen@bmj.com)

# BMJ Open

## Volume-outcome relationship in transcatheter aortic valve implantations in Germany 2008-2014

|                               |                                                                                                                                                                                                                                                                                                                                                                                                                                                                                                                                                                                                                                                                                                                                                                                                                                                                                                                                                                                                                                                                                                             |
|-------------------------------|-------------------------------------------------------------------------------------------------------------------------------------------------------------------------------------------------------------------------------------------------------------------------------------------------------------------------------------------------------------------------------------------------------------------------------------------------------------------------------------------------------------------------------------------------------------------------------------------------------------------------------------------------------------------------------------------------------------------------------------------------------------------------------------------------------------------------------------------------------------------------------------------------------------------------------------------------------------------------------------------------------------------------------------------------------------------------------------------------------------|
| Journal:                      | <i>BMJ Open</i>                                                                                                                                                                                                                                                                                                                                                                                                                                                                                                                                                                                                                                                                                                                                                                                                                                                                                                                                                                                                                                                                                             |
| Manuscript ID                 | bmjopen-2017-020204                                                                                                                                                                                                                                                                                                                                                                                                                                                                                                                                                                                                                                                                                                                                                                                                                                                                                                                                                                                                                                                                                         |
| Article Type:                 | Research                                                                                                                                                                                                                                                                                                                                                                                                                                                                                                                                                                                                                                                                                                                                                                                                                                                                                                                                                                                                                                                                                                    |
| Date Submitted by the Author: | 23-Oct-2017                                                                                                                                                                                                                                                                                                                                                                                                                                                                                                                                                                                                                                                                                                                                                                                                                                                                                                                                                                                                                                                                                                 |
| Complete List of Authors:     | <p>Kaier, Klaus; Medical Center-University of Freiburg, Institute for Medical Biometry and Statistics</p> <p>Oettinger, Vera; Heart Center Freiburg University, Department of Cardiology and Angiology I</p> <p>Reinecke, H; University of Muenster, Department of Cardiology and Angiology, Adult Congenital and Valvular Heart Disease Center Muenster</p> <p>Schmoor, Claudia; Medical Centre, University of Freiburg</p> <p>Frankenstein, L.; University of Heidelberg, Dpt. of Cardiology, Angiology, Pulmology</p> <p>Vach, Werner; Institute of Medical Biometry and Medical Informatics, Hehn, Philip; Faculty of Medicine and Medical Center – University of Freiburg</p> <p>von zur Mühlen, Constantin; Heart Center Freiburg University, Department of Cardiology and Angiology I</p> <p>Bode, Christoph; Heart Center Freiburg University, Department of Cardiology and Angiology I</p> <p>Zehender, Manfred; Heart Center Freiburg University, Department of Cardiology and Angiology I</p> <p>Reinöhl, Jochen; Heart Center Freiburg University, Department of Cardiology and Angiology I</p> |
| Keywords:                     | Valvular heart disease < CARDIOLOGY, HEALTH ECONOMICS, CARDIOLOGY, Adult cardiology < CARDIOLOGY                                                                                                                                                                                                                                                                                                                                                                                                                                                                                                                                                                                                                                                                                                                                                                                                                                                                                                                                                                                                            |
|                               |                                                                                                                                                                                                                                                                                                                                                                                                                                                                                                                                                                                                                                                                                                                                                                                                                                                                                                                                                                                                                                                                                                             |

SCHOLARONE™  
Manuscripts

## Volume-outcome relationship in transcatheter aortic valve implantations in Germany 2008-2014

Klaus Kaier, PhD<sup>1,2</sup>; Vera Oettinger<sup>2</sup>; Holger Reinecke, MD<sup>3</sup>; Claudia Schmoor, PhD<sup>4</sup>; Lutz Frankenstein, MD<sup>5</sup>; Werner Vach, PhD<sup>1</sup>; Philip Hehn<sup>1</sup>; Constantin von zur Mühlen, MD<sup>2</sup>; Christoph Bode, MD<sup>2</sup>; Manfred Zehender, MD, PhD<sup>2</sup>; Jochen Reinöhl, MD<sup>2</sup>

<sup>1</sup> Institute of Medical Biometry and Statistics, Faculty of Medicine and Medical Center – University of Freiburg, Germany

<sup>2</sup> Department of Cardiology and Angiology I, Heart Center Freiburg University, Germany

<sup>3</sup> Division of Vascular Medicine, Department of Cardiovascular Medicine, University Hospital Muenster, Germany

<sup>4</sup> Clinical Trials Unit, Medical Center – University of Freiburg, Germany

<sup>5</sup> Department of Cardiology, Angiology, Pulmonology, University of Heidelberg, Germany

### Corresponding author:

Klaus Kaier, PhD

Medical Center – University of Freiburg, Institute of Medical Biometry and Statistics

Stefan-Meier-Str. 26

79104 Freiburg, Germany

phone: + 49 (0)761 203-6807

e-mail: [kaier@imbi.uni-freiburg.de](mailto:kaier@imbi.uni-freiburg.de)

Word count excluding title page, abstract, references, figures and tables: 2838

## ABSTRACT

**Keywords:** TAVI, volume-outcome; minimum volume standards; hospital quality; mortality

**Objectives:** We examine the volume-outcome relationship in isolated transcatheter aortic valve implantations (TAVI) in Germany between 2008 and 2014 (N=43,996). Our interest was whether the volume-outcome relationship for TAVI exists on the center level, whether it occurs equally for different outcomes, and how it develops over time.

**Methods:** The comprehensive German Federal Bureau of Statistics DRG database was queried for data on all isolated TAVI procedures performed in Germany between 2008 and 2014. Logistic and linear regression analyses were carried out for the endpoints in-hospital mortality, bleeding, stroke, probability of ventilation >48 hours, length of hospital stay, and reimbursement. Risk-adjustment was applied using a predefined set of patient characteristics to account for differences in the risk factor composition of the patient populations between centers and over time. Centers performing TAVI were stratified into groups performing <50, 50-99, and  $\geq 100$  procedures per year.

**Results:** Risk-adjusted in-hospital mortality steadily decreases over the years and is lower the higher the annual procedure volume at the respective center is. The magnitude of the latter effect declines over the observation period. Overall, our results indicate a ceiling effect in the volume-outcome relationship: The volume-outcome relationship is eminent in circumstances of relatively unfavorable outcomes. Alongside improving outcomes, however, the volume-outcome relationship decreases. In addition, a volume-outcome relationship seems to be absent in circumstances of constantly low event rates.

**Conclusions:** The hypothesized volume-outcome relationship for TAVI exists but diminishes and may disappear over time. This might be the case for other interventional procedures, too, which should be taken into account when considering mandatory minimum thresholds.

## STRENGTHS AND LIMITATIONS OF THIS STUDY

- Study based on administrative data; coding errors are inevitable. However, about 20% of all cardiovascular diagnosis-related groups are reviewed by independent teams of physicians on behalf of the health insurers.
- Risk-adjustment included a number of parameters whose reliability cannot be fully secured, and we cannot guarantee that all parameters of relevance are included in the model. A major limitation is that the data source does not include information on the type of device used in individual TAVI procedures. In addition, information regarding the experience of surgeons at each centre would be highly relevant for the analysis but is unavailable.
- The dataset omits patients with a baseline diagnosis of pure aortic regurgitation, as well as those who underwent TAVI with any other concomitant cardiac procedure. This makes sense from a clinical perspective, but further complicates direct comparisons with other administrative datasets.
- The study provides comprehensive data on everyday TAVI practice in a large industrialized country over a multiyear period.

## KEY QUESTIONS

### What is already known about this subject?

After their introduction, outcomes of new interventions are subject to a learning curve effect, meaning that outcomes improve over a period of time and then level off. The volume of procedures performed at an institution can influence this process, and is thought to have some effect on patient outcomes even after learning is complete (volume-outcome-hypothesis).

### What does this study add?

This study tracks patient outcomes by center procedure volume in all transcatheter aortic valve implantation (TAVI) procedures performed in Germany between the procedure's introduction in 2008 and 2014, providing empirical evidence on shape and extent of the above described effects for this procedure.

### How might this impact on clinical practice?

1  
2  
3 This data is of interest to clinical practitioners, hospital administrators, and policy makers involved in the  
4 implementation of new clinical procedures.  
5

#### 6 7 **COMPETING INTERESTS AND FUNDING**

8  
9 The authors declare no conflicts of interest. There was no external funding for this work.  
10

#### 11 12 **DATA SHARING STATEMENT**

13 No additional data available.  
14

#### 15 16 **AUTHORSHIP STATEMENT**

17  
18 KK and JR developed the research question and designed the methodology. VÖ, HR, LF, CvzM, CB, MZ  
19 and JR provided the medical knowledge of German TAVI practice informing the study design. KK defined  
20 the categories, outcomes and measures and developed and implemented the formal analysis and  
21 statistical with support by WV and CS. KK and JR collected the data and evidence. KK, VÖ, and WV  
22 interpreted and contextualized the results. KK and PH wrote the initial draft of the article, with JR  
23 contributing. All authors participated in the critical revision of the article and provided final approval of the  
24 version to be published.  
25  
26  
27  
28  
29  
30  
31  
32  
33  
34  
35  
36  
37  
38  
39  
40  
41  
42  
43  
44  
45  
46  
47  
48  
49  
50  
51  
52  
53  
54  
55  
56  
57  
58  
59  
60

## INTRODUCTION

Transcatheter aortic valve implantation (TAVI) is a rapidly evolving technique for therapy of aortic stenosis, with a very early and pronounced utilization in Germany [1]. Previous studies report hospital-specific learning curves with respect to in-hospital outcomes such as procedural success, mortality and clinical complications of varying lengths and magnitudes [2–6]. In general, learning curve effects within and between centers can to some degree be explained by the volume of procedures performed at the center. This relationship can be summed up as the “practice-makes-perfect hypothesis”, according to which quality of care either increases with the number of patients as a result of economies of scale, with a competing explanation of “selective-referral”, according to which higher-quality hospitals attract greater demand and therefore have a greater volume of patients [7,8].

There are a number of criticisms on empirical analyses on the volume-outcome relationship: Many studies lack appropriate adjustment for differences in the risk factor composition of the patient populations between centers [9,10]. Secondly, most studies focus on in-hospital mortality only [11], which is easy to measure, but it is recommended to include additional quality measurements. Finally, most studies divided patients into groups of equal size for analyzing the volume-outcome relationship, which makes it difficult to make use of such results when justifying specific volume thresholds[6,12,13].

Although the evidence regarding the existence of an inverse relationship between the number of TAVI procedures and related outcomes is limited [14,15], medical authorities in Germany and several other countries have issued guidelines calling for minimum numbers of procedures for primary operators performing TAVI [16–19]. There however remains some question whether, firstly, the volume-outcome relationship outlined above exists on the center level regarding TAVI and, secondly, whether or not it takes place in all outcomes and complications equally, and how an existing volume-outcome relationship might change over the years.

To address these questions, we calculated annual procedure volumes for all German hospitals that performed TAVI procedures between January 2008 and December 2014. In order to account for differences in the patient population between high-, medium-, and low-volume centers and over time, we carried out baseline-adjusted regression analyses for the endpoints in-hospital mortality, bleeding, stroke, probability of ventilation >48 hours, length of hospital stay, and reimbursement.

## METHODS

### Data

Since 2005, data on all hospitalizations in Germany have been available for scientific use via the Diagnosis Related Groups (DRG) statistics collected by the Research Data Center of the Federal Bureau of Statistics (DESTATIS). These hospitalization data, including diagnoses and procedures, are a valuable source of representative nationwide data on the in-hospital treatment of patients. This database represents a virtually complete collection of all hospitalizations in German hospitals that are reimbursed according to the DRG system. From this database [1], we have extracted data on 43,996 cases of isolated TAVI for our analysis.

Our study did not involve direct access by the investigators to data on individual patients but only access to summary results provided by the Research Data Center. Therefore, approval by an ethics committee and informed consent were determined not to be required, in accordance with German law. All summary results were anonymized by DESTATIS. In practice, this means that any information allowing the drawing of conclusions regarding a single patient or a specific hospital are censored by DESTATIS to guarantee data protection. Especially the use of the anonymous, persistent "institute indicator of hospitals" is highly restricted in order not to publish any information directly attributable to a single hospital.

As described previously [1,20], we were able to use the OPS codes (OPS codes: 5-35a.0 in 2007 and 5-35a.00, 5-35a.01 from 2008) to identify all TAVI procedures performed (and reimbursed) in Germany between 2008 and 2014. Patients with a baseline diagnosis of pure aortic regurgitation (main or secondary diagnosis other than I35.0, I35.2, I06.0, I06.2) and those with concomitant cardiac surgery or percutaneous coronary intervention were not included in this analysis. A complete list of procedure codes as well as a more detailed discussion of the validity of the data source may be found in a previous manuscript [1,20].

### Measures

Regarding the in-hospital complications, bleeding was defined as requiring a transfusion of more than 5 units of red blood cells (RBC). For all other comorbidities and complications the existing anamnestic or acute distinctive codes were used (we have discussed OPS and ICD codes in greater detail previously [20]).



1  
2  
3 In order to analyze possible effects of the above discussed mandatory minimum quantities, the number of  
4 procedures per year and center was categorized (i.e.  $n < 50$ ,  $50 \leq n < 100$ ,  $n \geq 100$ ) on the basis of an  
5 anonymous, persistent "institute indicator of hospitals" provided by DESTATIS. These particular  
6 thresholds are applied because the minimum number of 50 procedures is often mentioned in official  
7 TAVI-guidelines [16–19], and these thresholds are widely applied in the literature [21–23].  
8  
9

10  
11  
12 The primary outcome was in-hospital mortality. Secondary outcomes include post-procedural  
13 complications such as stroke and bleeding events (transfusion of  $\geq 5$  RBC), as well as reimbursement,  
14 length of hospital stay and proportion of patients with ventilation  $> 48$ h.  
15  
16  
17

### 18 **Statistical analysis**

19  
20  
21 In a first step, multivariate regression analyses were carried out for the different endpoints, with all  
22 available patient and procedural characteristics (as defined by Reinöhl et al. [1]) included as covariates  
23 (all covariates listed in Table 1). In addition, an interaction term between time (in years) and the above  
24 mentioned annual volume categories was included in the regression analyses in order to investigate the  
25 volume-outcome relationship over the years.  
26  
27  
28  
29  
30  
31  
32  
33  
34  
35  
36  
37  
38  
39  
40  
41  
42  
43  
44  
45  
46  
47  
48  
49  
50  
51  
52  
53  
54  
55  
56  
57  
58  
59  
60

**Table 1: Baseline characteristics (2008-2014)**

|                                                     |               |
|-----------------------------------------------------|---------------|
| N                                                   | 43,996        |
| Female                                              | 55.87%        |
| Age in years, mean/SD                               | 80.95/6.11    |
| Estimated logistic EuroSCORE <sup>1</sup> , mean/SD | 22.21%/13.57% |
| Aortic valve stenosis                               | 68.22%        |
| Combined aortic valve diseases                      | 26.56%        |
| Heart failure                                       |               |
| NYHA II                                             | 8.26%         |
| NYHA III or IV                                      | 41.66%        |
| Hypertension                                        | 62.66%        |
| CAD                                                 | 46.88%        |
| Previous myocardial infarction                      |               |
| within 4 months                                     | 1.59%         |
| within 1 year                                       | 0.75%         |
| after 1 year                                        | 4.35%         |
| Previous CABG                                       | 12.75%        |
| Previous cardiac surgery                            | 18.06%        |
| Peripheral vascular disease                         | 12.39%        |
| Carotid disease                                     | 6.17%         |
| COPD                                                | 15.14%        |
| Pulmonary hypertension                              | 22.32%        |
| Renal disease                                       |               |
| GFR <15ml/min                                       | 2.95%         |
| GFR <30ml/min                                       | 4.90%         |
| Atrial fibrillation                                 | 45.93%        |
| Diabetes                                            | 33.30%        |

<sup>1</sup>For calculation of the logistic EuroSCORE, we were able to populate all fields except for critical preoperative state and left ventricular function. In these we assumed an inconspicuous state (i.e. no critical preoperative state and no left ventricular dysfunction) and thus calculated a best-case scenario.

Abbreviations: NYHA – New York Heart Association Functional Classification; CAD – coronary artery disease; CABG – coronary artery bypass graft; COPD – chronic obstructive pulmonary disease; GFR – glomerular filtration rate.

Please note that in comparison to the data published by Reinöhl et al., one TA-TAVI procedure (in 2010) needed to be removed from the dataset due to incomplete information.

1  
2  
3 Logistic and linear regression analyses are applied for dichotomous and continuous endpoints,  
4 respectively. The question of how to account for patients treated in the same hospital was discussed  
5 previously [13,24,25]. As recommended in a previous study that also used data from the German DRG-  
6 statistic [13], we used cluster-robust standard errors to account for this dependency.  
7  
8

9  
10 Risk-adjusted rates and means within each year and hospital volume category were obtained by  
11 computing the corresponding predicted probabilities or means, respectively, for an artificial subject with  
12 each confounder set to its mean value (prediction at the means, see Table 1 for mean values of all  
13 confounders).  
14  
15

16  
17  
18 The visualization of these risk-adjusted rates or means together with their 95% confidence intervals  
19 constitutes the main analytical approach in this paper. To assess the statistical significance of the  
20 observed volume-outcome relationship, of the time trend and a potential change of the volume-outcome  
21 relationship over time, we applied to the estimated rates or means a random effects meta regression  
22 (command metareg [26]) with time and volume as continuous covariates. A model with an interaction term  
23 was used to assess the change in the volume-outcome relationship. A model without an interaction was  
24 used to assess the main effects.  
25  
26  
27  
28  
29  
30

31  
32 All analyses were carried out using Stata 13.1 (StataCorp, College Station, Texas, USA).  
33  
34

## 35 **RESULTS**

36  
37  
38 Between 2008 and 2014, a total of 43,996 TAVI procedures were performed in 113 different centers in  
39 Germany. The total number of TAVI procedures performed per year increased markedly over the  
40 observation period, from 1,122 in 2008 to 11,559 in 2014 (see Table 2).  
41  
42  
43  
44  
45  
46  
47  
48  
49  
50  
51  
52  
53  
54  
55  
56  
57  
58  
59  
60

**Table 2: Number of procedures with regard to the performed TAVI volume of a distinct center in a given year.**

| <b>TAVI Volume in Center</b>               | <b>2008</b>            | <b>2009</b>            | <b>2010</b>       | <b>2011</b>       | <b>2012</b>       | <b>2013</b>       | <b>2014</b>        |
|--------------------------------------------|------------------------|------------------------|-------------------|-------------------|-------------------|-------------------|--------------------|
| <50 procedures, n (number of centers)      | 613 (40)               | 1,234 (61)             | 1,155 (51)        | 1,107 (43)        | 960 (36)          | 765 (31)          | 617 (30)           |
| 50-99 procedures, n (number of centers)    | 236 (3)                | 658 (10)               | 1,875 (26)        | 1,957 (27)        | 1,569 (20)        | 1,930 (25)        | 1,135 (16)         |
| >=100 procedures, n (number of centers)    | 273 (n/a*)             | 707 (n/a)              | 1,776 (3)         | 3,459 (7)         | 5,711 (16)        | 6,452 (9)         | 9,807 (20)         |
| <b>Total number, n (number of centers)</b> | <b>1,122 (&gt;=44)</b> | <b>2,599 (&gt;=72)</b> | <b>4,806 (80)</b> | <b>6,523 (77)</b> | <b>8,240 (72)</b> | <b>9,147 (65)</b> | <b>11,559 (66)</b> |

Please note that the numbers of procedures performed per year at a given center were not constant over the observation period, so that it is possible for a center to fall into a different volume group in a different year. Number of centres in parentheses.

\* n/a = not available, exact number censored by DESTATIS due to data protection concerns

1  
2  
3 As reported previously [1], substantial reductions in in-hospital mortality have been achieved between  
4 2008 and 2013, and we find this trend to continue into 2014. Regarding center-specific procedure  
5 volumes of all TAVI procedures, it appears that the differences in unadjusted in-hospital mortality  
6 between the procedure volume groups (<50, 50-99, and >=100) steadily decline over the years (see  
7 Table 3). Figure 1 A provides risk-adjusted in-hospital mortality rates allowing for comparison despite  
8 possible differences in the patient selection process and consequently the risk factor composition  
9 between hospitals in the different procedure volume groups and over time (See Table S1 for details of  
10 the process used to generate the results shown in Figure 1A). These results indicate that risk-adjusted in-  
11 hospital mortality rates (1) steadily decrease over the years (annual change: -0.58 percentage points (pp),  
12 p<0.001), are (2) lower the higher the procedure volume at the hospital is (volume effect: -0.74pp,  
13 p=0.002), but that (3) this volume effect declines over the seven year observation period (p-value of  
14 interaction term: p=0.027; annual change of volume effect: 0.2pp).  
15  
16  
17  
18  
19  
20  
21  
22  
23  
24  
25  
26  
27  
28  
29  
30  
31  
32  
33  
34  
35  
36  
37  
38  
39  
40  
41  
42  
43  
44  
45  
46  
47  
48  
49  
50  
51  
52  
53  
54  
55  
56  
57  
58  
59  
60

Table 3: Unadjusted in-hospital outcomes with regard to the performed TAVI volume of a distinct center in a given year.

|                  | Mortality, % | Stroke, % | Bleeding, % | Length of stay, mean in days | Reimbursement, mean in € | Proportion of patients with ventilation >48h, % |
|------------------|--------------|-----------|-------------|------------------------------|--------------------------|-------------------------------------------------|
| <b>2008</b>      |              |           |             |                              |                          |                                                 |
| <50 procedures   | 10.11%       | 3.26%     | 14.36%      | 19.2                         |                          | 9.79%                                           |
| 50-99 procedures | 9.32%        | 2.12%     | 11.44%      | 21.8                         |                          | 6.78%                                           |
| >=100 procedures | 6.59%        | 2.56%     | 7.33%       | 14.7                         |                          | 4.76%                                           |
| <b>2009</b>      |              |           |             |                              |                          |                                                 |
| <50 procedures   | 9.81%        | 3.57%     | 14.18%      | 21.6                         |                          | 9.48%                                           |
| 50-99 procedures | 8.36%        | 3.34%     | 11.25%      | 18.5                         |                          | 7.14%                                           |
| >=100 procedures | 6.08%        | 2.12%     | 7.21%       | 18.0                         |                          | 7.36%                                           |
| <b>2010</b>      |              |           |             |                              |                          |                                                 |
| <50 procedures   | 9.00%        | 2.51%     | 12.12%      | 21.0                         | 37,071€                  | 8.74%                                           |
| 50-99 procedures | 8.11%        | 2.56%     | 11.41%      | 19.1                         | 36,173€                  | 8.69%                                           |
| >=100 procedures | 6.14%        | 2.20%     | 6.25%       | 17.0                         | 35,074€                  | 5.01%                                           |
| <b>2011</b>      |              |           |             |                              |                          |                                                 |
| <50 procedures   | 7.68%        | 2.35%     | 9.39%       | 20.0                         | 35,984€                  | 8.04%                                           |
| 50-99 procedures | 8.02%        | 2.35%     | 9.04%       | 19.3                         | 35,424€                  | 8.28%                                           |
| >=100 procedures | 5.87%        | 3.01%     | 9.31%       | 17.3                         | 35,046€                  | 7.29%                                           |
| <b>2012</b>      |              |           |             |                              |                          |                                                 |
| <50 procedures   | 6.15%        | 2.29%     | 8.44%       | 18.7                         | 35,294€                  | 7.29%                                           |
| 50-99 procedures | 7.07%        | 2.42%     | 8.41%       | 18.9                         | 34,798€                  | 5.48%                                           |
| >=100 procedures | 5.03%        | 2.10%     | 6.30%       | 16.7                         | 34,233€                  | 5.39%                                           |
| <b>2013</b>      |              |           |             |                              |                          |                                                 |
| <50 procedures   | 5.49%        | 2.09%     | 9.28%       | 20.2                         | 35,808€                  | 6.93%                                           |
| 50-99 procedures | 5.85%        | 2.33%     | 6.53%       | 18.2                         | 34,650€                  | 4.56%                                           |
| >=100 procedures | 5.29%        | 2.70%     | 5.98%       | 16.3                         | 34,456€                  | 5.29%                                           |
| <b>2014</b>      |              |           |             |                              |                          |                                                 |
| <50 procedures   | 5.34%        | 2.75%     | 5.99%       | 19.9                         | 35,993€                  | 6.15%                                           |
| 50-99 procedures | 4.58%        | 2.20%     | 5.73%       | 18.3                         | 34,904€                  | 4.32%                                           |
| >=100 procedures | 3.70%        | 2.28%     | 4.22%       | 15.3                         | 34,771€                  | 3.92%                                           |

Please note that the numbers of procedures performed per year at a given center were not constant over the observation period, so that it is possible for a center to fall into a different volume group in a different year.

1  
2  
3 Over the seven years of data we analyzed, a slight decreasing trend was visible in the risk-adjusted in-  
4 hospital stroke rate, which started out at 2-2,5% in 2008-2009 and ranged from 1,5-2% in 2013-2014  
5 (Figure 1 B). Volume-outcome relationship was actually negative for years following 2010, with higher-  
6 volume centers having higher stroke rates.  
7  
8

9  
10 Risk-adjusted bleeding rates (Figure 1 C), in contrast, showed a clear beneficial effect of higher center  
11 procedure volumes for all years but 2011. The magnitude of the effect was distinct from 2008-2010 and  
12 decreased in the following years in parallel with an ongoing marked decrease in the general likelihood of  
13 bleeding complications, but still was present in 2013/2014.  
14  
15

16  
17 For risk-adjusted in-hospital ventilation rate (>48h) (Figure 1 D), a pronounced beneficial effect of higher  
18 center procedure volumes persisted throughout the observation period. In addition, risk-adjusted in-  
19 hospital ventilation rates decreased substantially over the years. As for bleeding, the magnitude of the  
20 volume effect was distinct in the first years but steadily declined over the seven year period (annual  
21 change of the volume effect: 0.30pp, p=0.041).  
22  
23

24  
25 Risk-adjusted in-hospital length of stay shows a strong beneficial effect of center procedure volume  
26 (Figure 2 A). Unlike the situation found for the endpoints mortality and bleeding, the magnitude of the  
27 effect did not decrease much over the observed timeframe. There also is a slight reduction in average  
28 length of stay over the years.  
29  
30

31  
32 Standardized reimbursement data (Figure 2 B) is only available starting in 2010 due to a change in the  
33 reimbursement system making previous data difficult to compare. In Germany, reimbursement is based  
34 on DRGs which are defined by the patients' diagnoses, gender and age, treatment procedures,  
35 complications or comorbidities, and further attributes. Based on this data, a predetermined  
36 reimbursement rate per case is calculated. Hospitals receive additional reimbursement for long-stay  
37 outlier cases [27]. Furthermore, additional reimbursement is possible for very complex intensive care  
38 treatments, which have to be proven by documentation of illness severity and treatment effort during ICU  
39 stay [28]. As shown in Figure 2 B, there is a drop in the overall reimbursement level from 2010-2012, but  
40 reimbursement stays roughly the same thereafter. In much the same way as found for length of hospital  
41 stay, risk-adjusted amount of reimbursement decreased only slightly over time, and showed a large  
42 volume effect which did not change over the five year period.  
43  
44  
45  
46  
47  
48  
49  
50  
51  
52  
53  
54  
55  
56  
57  
58  
59  
60

## CONCLUSIONS

Our study shows mixed results regarding a volume-outcome relationship in TAVI procedures in German hospitals. First of all, TAVI-related in-hospital mortality decreased substantially between 2008 and 2014 and was lower the higher the procedure volume at the respective hospital is. The magnitude of this volume-outcome relationship, however, declines over the observation period. Especially in later years (2012-2014) differences in mortality between low-, medium-, and high-volume centers are small.

Regarding in-hospital mortality and secondary endpoints, a volume-outcome relationship is eminent in circumstances of relatively unfavorable outcomes (see early years of mortality, bleeding, and ventilation) and decreases as outcomes improve (later years of mortality, bleeding, and ventilation), but is not present in circumstances of constantly low event rates (see stroke). In addition, in most of the cases when we observe a distinct annual decrease, we also observe a decreasing volume effect over time. Presumably, the small centers succeed in participating at the system level learning curve to a degree which allows them to catch up to some degree to the group of high-volume. Unfortunately, our data does not allow addressing the question whether this is due to exchange of expertise or to increasing cumulative experience. The group of small centers may also benefit from there being only a reduced capacity for improvement even in large volume centers some years after the introduction of a new procedure.

Interestingly, decreases in the volume effect over time were not observed for the endpoints of in-hospital length of stay and reimbursement. Presumably, this might be due to the fact that high-volume centers are at a major advantage in streamlining clinical workflows before and after the procedure.

Two recent studies showed volume-outcome relationships for TAVI procedures performed in US hospitals in 2012 [14,15]. In both studies, patients were divided into groups of equal sample size. Disregarding the accompanying problems regarding the external validity of the results [12,13], the results shown in these studies are similar to ours: Among others, inverse volume-outcome relationships were shown for the endpoints death and bleeding [14,15]. One of the two studies also included the endpoints length of stay and hospitalization costs and identified significant differences between the observed hospital volume quartiles (TAVI/year cutoffs  $\leq 5$ , 6-10, 11-20 and  $>20$ ) [15]. The other study also included the endpoint stroke and did not show significant differences between volume groups (TAVI cutoffs: 20 or 10 cases for different access routes) [14].



1  
2  
3 As stated before, medical authorities in several countries have issued guidelines calling for minimum  
4 numbers of procedures for primary operators performing TAVI [16–19].

5  
6 In Germany, such mandatory minimums are not yet implemented, but a mandatory number of 50 TAVI  
7 procedures annually is officially recommended [19], and this number is also mentioned in guidelines from  
8 the UK, Canada and Portugal [16–18]. Our results confirm the existence of a volume-outcome  
9 relationship for TAVI procedures between 2008 and 2014, and these effects are in line with existing  
10 evidence from TAVI procedures performed in US hospitals [6,14,15]. The above discussed weakening of  
11 the volume-outcome relationship over time, however, relativizes the rationale behind mandatory minimum  
12 numbers of procedures: The volume-outcome relationship may be considerable in the years following the  
13 introduction of a new procedure when there still is a lot of room for improvement (in the two of the cited  
14 studies [14,15], i.e. 2012). After a few years, then, the association between procedure numbers and  
15 better performance may diminish (see our results regarding the year 2014 and presumably thereafter). In  
16 the worst case, the volume effect is already gone by the time mandatory minimums are finally  
17 implemented, or the implementation hinders the system to reach optimal health service without  
18 restrictions. It should be, however, noted that the average number of TAVI procedures per hospital is  
19 larger in Germany compared to most other countries, and that hence the time span until such a point is  
20 reached may be longer in other countries.  
21  
22  
23  
24  
25  
26  
27  
28  
29  
30  
31  
32  
33

34 This might be especially problematic since mandatory minimum quantities on the center level are not free  
35 of further disadvantages. They are thought to lead to centralization of procedures in large hospitals,  
36 necessitating costly patient transfers and potentially worse aftercare. In addition, it is unclear how an  
37 optimal threshold could be set (and adjusted yearly) and by whom, how effects of physician volume and  
38 hospital volume should be combined, whether low-volume hospitals and their surgeons perceive the  
39 thresholds as new incentives to operate, and how new and innovative hospitals might be able to enter the  
40 market [29]. The latter question is especially relevant for TAVI since a recent study showed that between  
41 2010 and 2015 a new center entering the TAVI market needed to perform 54 procedures to achieve  
42 clinical outcomes comparable to those reported in high-volume centers [30]. According to the authors of  
43 the study, this represents more than 2 years of continuous activity [30].  
44  
45  
46  
47  
48  
49  
50  
51  
52

53 In addition, the question remains how to integrate the observed volume effects into the existing theory.  
54 The “practice-makes-perfect hypothesis” implies a contrary causal relationship than the theory of  
55  
56  
57  
58  
59  
60

1  
2  
3 “selective-referral” [7,8], and we cannot answer the question whether volume generates quality (practice  
4 makes perfect), quality generates volume (selective referral), or both.  
5

6  
7 Furthermore, Gandjour et al. differentiated the “practice-makes-perfect hypothesis” into learning curve  
8 effects, economies of scope, and the concept of a focused factory [31]. Improved outcomes may result  
9 from economies of scale: every time doctors perform a procedure, they gain experience. Economies of  
10 scope, in contrast, would occur from the simultaneous performance of dissimilar procedures. In the TAVI  
11 context, this means that a high-volume center might see improved TAVI outcomes as a result of the  
12 performance of high numbers of other procedures. Accordingly, Epstein already raised the question  
13 whether similar procedures should also be counted towards a set volume threshold [29]. The focused  
14 factory concept, in contrast, assumes that focusing on a small number of procedures could also be  
15 favorable [31]. Unfortunately, none of the existing approaches analyzed whether the volume-outcome  
16 relationship differs in accordance to the number of other (closely related) procedures conducted in the  
17 respective center.  
18  
19  
20  
21  
22  
23  
24  
25  
26

27 We conclude that the hypothesized volume-outcome relationship for TAVI exists but diminishes and may  
28 disappear over time. This might be the case for other interventional procedures, too, which should be  
29 taken into account when considering mandatory minimum thresholds.  
30  
31  
32  
33  
34  
35  
36  
37  
38  
39  
40  
41  
42  
43  
44  
45  
46  
47  
48  
49  
50  
51  
52  
53  
54  
55  
56  
57  
58  
59  
60

## Reference List

1. Reinöhl, J., Kaier, Klaus, Reinecke, Holger, Schmoor, Claudia, Frankenstein, Lutz, Vach, Werner, et al. Effect of Availability of Transcatheter Aortic Valve Replacement on Clinical Practice. *N. Engl. J. Med.* 2015;373:2438–47.
2. Gurvitch R, Tay EL, Wijesinghe N, Ye J, Nietlispach F, Wood DA, et al. Transcatheter aortic valve implantation: lessons from the learning curve of the first 270 high-risk patients. *Catheter. Cardiovasc. Interv.* 2011;78:977–84.
3. Cerillo AG, Murzi M, Glauber M, Berti S. Quality Control and the Learning Curve of Transcatheter Aortic Valve Implantation. *JACC Cardiovasc. Interv.* 2012;5:456.
4. Alli OO, Booker JD, Lennon RJ, Greason KL, Rihal CS, Holmes DR. Transcatheter Aortic Valve Implantation. *JACC Cardiovasc. Interv.* 2012;5:72–9.
5. Arai T, Lefèvre T, Hovasse T, Hayashida K, Watanabe Y, O'Connor SA, et al. Evaluation of the learning curve for transcatheter aortic valve implantation via the transfemoral approach. *Int. J. Cardiol.* 2016;203:491–7.
6. Carroll JD, Vemulapalli S, Dai D, Matsouaka R, Blackstone E, Edwards F, et al. Procedural Experience for Transcatheter Aortic Valve Replacement and Relation to Outcomes. *J. Am. Coll. Cardiol.* 2017;70:29–41.
7. Gaynor M, Seider H, Vogt WB. The volume-outcome effect, scale economies, and learning-by-doing. *Am. Econ. Rev.* 2005;95:243–7.
8. Luft HS, Hunt SS, Maerki SC. The volume-outcome relationship: practice-makes-perfect or selective-referral patterns? *Health Serv. Res.* 1987;22:157–82.
9. Halm EA, Lee C, Chassin MR. Is volume related to outcome in health care? A systematic review and methodologic critique of the literature. *Ann. Intern. Med.* 2002;137:511–20.
10. Shahian DM, Normand S-LT. The volume-outcome relationship: from Luft to Leapfrog. *Ann. Thorac. Surg.* 2003;75:1048–58.
11. Barker D, Rosenthal G, Cram P. Simultaneous relationships between procedure volume and mortality: do they bias studies of mortality at specialty hospitals? *Health Econ.* 2011;20:505–18.
12. Christian CK, Gustafson ML, Betensky RA, Daley J, Zinner MJ. The Leapfrog volume criteria may fall short in identifying high-quality surgical centers. *Ann. Surg.* 2003;238:447–57.
13. Hentschker C, Mennicken R. The Volume-Outcome Relationship and Minimum Volume Standards—Empirical Evidence for Germany. *Health Econ.* 2015;24:644–58.
14. Kim LK, Minutello RM, Feldman DN, Swaminathan RV, Bergman G, Singh H, et al. Association between transcatheter aortic valve implantation volume and outcomes in the United States. *Am. J. Cardiol.* 2015;116:1910–5.

15. Badheka AO, Patel NJ, Panaich SS, Patel SV, Jhamnani S, Singh V, et al. Effect of hospital volume on outcomes of transcatheter aortic valve implantation. *Am. J. Cardiol.* 2015;116:587–94.
16. Webb J, Rodés-Cabau J, Fremes S, Pibarot P, Ruel M, Ibrahim R, et al. Transcatheter Aortic Valve Implantation: A Canadian Cardiovascular Society Position Statement. *Can. J. Cardiol.* 2012;28:520–8.
17. British Cardiovascular Intervention Society (BCIS) and the Society of Cardiothoracic Surgeons (SCTS). A position statement of the British Cardiovascular Intervention Society (BCIS) and the Society of Cardiothoracic Surgeons (SCTS) [Internet]. 2013 [cited 2015 Nov 12]. Available from: <http://www.bcis.org.uk/resources/documents/BCIS%20SCTS%20position%20statement.pdf>
18. Campante Teles R, Ribeiro VG, Patrício L, Neves JP, Vouga L, Fragata J, et al. Position statement on transcatheter aortic valve implantation in Portugal. *Rev. Port. Cardiol. Engl. Ed.* 2013;32:801–5.
19. Kuck KH, Eggebrecht H, Figulla HR, Haude M, Katus H, Möllmann H, et al. Qualitätskriterien zur Durchführung der transvaskulären Aortenklappenimplantation. *Kardiologe.* 2015;9:11–26.
20. Reinöhl, J., K. Kaier, Reinecke H, Schmoor C, Frankenstein, L., Vach, W., et al. Effect of Availability of Transcatheter Aortic Valve Replacement on Clinical Practice: Supplementary Appendix. *N. Engl. J. Med.* 2015;373:2438–47.
21. Fedeli U, Alba N, Schievano E, Visentin C, Rosato R, Zorzi M, et al. Diffusion of good practices of care and decline of the association with case volume: the example of breast conserving surgery. *BMC Health Serv. Res.* 2007;7:167.
22. Nguyen NT, Paya M, Stevens CM, Mavandadi S, Zainabadi K, Wilson SE. The relationship between hospital volume and outcome in bariatric surgery at academic medical centers. *Ann. Surg.* 2004;240:586–94.
23. Hollenbeak CS, Rogers AM, Barrus B, Wadiwala I, Cooney RN. Surgical volume impacts bariatric surgery mortality: a case for centers of excellence. *Surgery.* 2008;144:736–43.
24. Farley DE, Ozminkowski RJ. Volume-outcome relationships and inhospital mortality: the effect of changes in volume over time. *Med. Care.* 1992;30:77–94.
25. Hamilton BH, Hamilton VH. Estimating surgical volume—outcome relationships applying survival models: accounting for frailty and hospital fixed effects. *Health Econ.* 1997;6:383–95.
26. Harbord RM, Higgins JP. Meta-regression in Stata. *Stata J.* 2008;8:493–519.
27. Quentin W, Geissler A, Scheller-Kreinsen D, Busse R. DRG-type hospital payment in Germany: The G-DRG system. *Euro Obs.* 2010;12:4–6.
28. Braun J-P, Bause H, Bloos F, Geldner G, Kastrup M, Kuhlen R, et al. Peer reviewing critical care: a pragmatic approach to quality management. *GMS Ger. Med. Sci.* 2010;8.
29. Epstein A. Volume and outcome - it is time to move ahead. *N. Engl. J. Med.* 2002;346:1161–4.
30. Lunardi M, Pesarini G, Zivelonghi C, Piccoli A, Geremia G, Ariotti S, et al. Clinical outcomes of transcatheter aortic valve implantation: from learning curve to proficiency. *Open Heart.* 2016;3:e000420.

1  
2  
3  
4  
5  
6  
7  
8  
9  
10  
11  
12  
13  
14  
15  
16  
17  
18  
19  
20  
21  
22  
23  
24  
25  
26  
27  
28  
29  
30  
31  
32  
33  
34  
35  
36  
37  
38  
39  
40  
41  
42  
43  
44  
45  
46  
47  
48  
49  
50  
51  
52  
53  
54  
55  
56  
57  
58  
59  
60

31. Gandjour A, Lauterbach KW. The practice-makes-perfect hypothesis in the context of other production concepts in health care. Am. J. Med. Qual. 2003;18:171-5.

For peer review only

**Table 1: Baseline characteristics (2008-2014)**

|                                                     |               |
|-----------------------------------------------------|---------------|
| N                                                   | 43,996        |
| Female                                              | 55.87%        |
| Age in years, mean/SD                               | 80.95/6.11    |
| Estimated logistic EuroSCORE <sup>1</sup> , mean/SD | 22.21%/13.57% |
| Aortic valve stenosis                               | 68.22%        |
| Combined aortic valve diseases                      | 26.56%        |
| Heart failure                                       |               |
| NYHA II                                             | 8.26%         |
| NYHA III or IV                                      | 41.66%        |
| Hypertension                                        | 62.66%        |
| CAD                                                 | 46.88%        |
| Previous myocardial infarction                      |               |
| within 4 months                                     | 1.59%         |
| within 1 year                                       | 0.75%         |
| after 1 year                                        | 4.35%         |
| Previous CABG                                       | 12.75%        |
| Previous cardiac surgery                            | 18.06%        |
| Peripheral vascular disease                         | 12.39%        |
| Carotid disease                                     | 6.17%         |
| COPD                                                | 15.14%        |
| Pulmonary hypertension                              | 22.32%        |
| Renal disease                                       |               |
| GFR <15ml/min                                       | 2.95%         |
| GFR <30ml/min                                       | 4.90%         |
| Atrial fibrillation                                 | 45.93%        |
| Diabetes                                            | 33.30%        |

<sup>1</sup>For calculation of the logistic EuroSCORE, we were able to populate all fields except for critical preoperative state and left ventricular function. In these we assumed an inconspicuous state (i.e. no critical preoperative state and no left ventricular dysfunction) and thus calculated a best-case scenario.

Abbreviations: NYHA – New York Heart Association Functional Classification; CAD – coronary artery disease; CABG – coronary artery bypass graft; COPD – chronic obstructive pulmonary disease; GFR – glomerular filtration rate.

Please note that in comparison to the data published by Reinöhl et al., one TA-TAVI procedure (in 2010) needed to be removed from the dataset due to incomplete information.

**Table 2: Number of procedures with regard to the performed TAVI volume of a distinct center in a given year.**

| TAVI Volume in Center                      | 2008                   | 2009                   | 2010              | 2011              | 2012              | 2013              | 2014               |
|--------------------------------------------|------------------------|------------------------|-------------------|-------------------|-------------------|-------------------|--------------------|
| <50 procedures, n (number of centers)      | 613 (40)               | 1,234 (61)             | 1,155 (51)        | 1,107 (43)        | 960 (36)          | 765 (31)          | 617 (30)           |
| 50-99 procedures, n (number of centers)    | 236 (3)                | 658 (10)               | 1,875 (26)        | 1,957 (27)        | 1,569 (20)        | 1,930 (25)        | 1,135 (16)         |
| >=100 procedures, n (number of centers)    | 273 (n/a*)             | 707 (n/a)              | 1,776 (3)         | 3,459 (7)         | 5,711 (16)        | 6,452 (9)         | 9,807 (20)         |
| <b>Total number, n (number of centers)</b> | <b>1,122 (&gt;=44)</b> | <b>2,599 (&gt;=72)</b> | <b>4,806 (80)</b> | <b>6,523 (77)</b> | <b>8,240 (72)</b> | <b>9,147 (65)</b> | <b>11,559 (66)</b> |

Please note that the numbers of procedures performed per year at a given center were not constant over the observation period, so that it is possible for a center to fall into a different volume group in a different year. Number of centers in parentheses.

\* n/a = not available, exact number censored by DESTATIS due to data protection concerns

Table 3: Unadjusted in-hospital outcomes with regard to the performed TAVI volume of a distinct center in a given year.

|                  | Mortality, % | Stroke, % | Bleeding, % | Length of stay, mean in days | Reimbursement, mean in € | Proportion of patients with ventilation >48h, % |
|------------------|--------------|-----------|-------------|------------------------------|--------------------------|-------------------------------------------------|
| <b>2008</b>      |              |           |             |                              |                          |                                                 |
| <50 procedures   | 10.11%       | 3.26%     | 14.36%      | 19.2                         |                          | 9.79%                                           |
| 50-99 procedures | 9.32%        | 2.12%     | 11.44%      | 21.8                         |                          | 6.78%                                           |
| >=100 procedures | 6.59%        | 2.56%     | 7.33%       | 14.7                         |                          | 4.76%                                           |
| <b>2009</b>      |              |           |             |                              |                          |                                                 |
| <50 procedures   | 9.81%        | 3.57%     | 14.18%      | 21.6                         |                          | 9.48%                                           |
| 50-99 procedures | 8.36%        | 3.34%     | 11.25%      | 18.5                         |                          | 7.14%                                           |
| >=100 procedures | 6.08%        | 2.12%     | 7.21%       | 18.0                         |                          | 7.36%                                           |
| <b>2010</b>      |              |           |             |                              |                          |                                                 |
| <50 procedures   | 9.00%        | 2.51%     | 12.12%      | 21.0                         | 37,071€                  | 8.74%                                           |
| 50-99 procedures | 8.11%        | 2.56%     | 11.41%      | 19.1                         | 36,173€                  | 8.69%                                           |
| >=100 procedures | 6.14%        | 2.20%     | 6.25%       | 17.0                         | 35,074€                  | 5.01%                                           |
| <b>2011</b>      |              |           |             |                              |                          |                                                 |
| <50 procedures   | 7.68%        | 2.35%     | 9.39%       | 20.0                         | 35,984€                  | 8.04%                                           |
| 50-99 procedures | 8.02%        | 2.35%     | 9.04%       | 19.3                         | 35,424€                  | 8.28%                                           |
| >=100 procedures | 5.87%        | 3.01%     | 9.31%       | 17.3                         | 35,046€                  | 7.29%                                           |
| <b>2012</b>      |              |           |             |                              |                          |                                                 |
| <50 procedures   | 6.15%        | 2.29%     | 8.44%       | 18.7                         | 35,294€                  | 7.29%                                           |
| 50-99 procedures | 7.07%        | 2.42%     | 8.41%       | 18.9                         | 34,798€                  | 5.48%                                           |
| >=100 procedures | 5.03%        | 2.10%     | 6.30%       | 16.7                         | 34,233€                  | 5.39%                                           |
| <b>2013</b>      |              |           |             |                              |                          |                                                 |
| <50 procedures   | 5.49%        | 2.09%     | 9.28%       | 20.2                         | 35,808€                  | 6.93%                                           |
| 50-99 procedures | 5.85%        | 2.33%     | 6.53%       | 18.2                         | 34,650€                  | 4.56%                                           |
| >=100 procedures | 5.29%        | 2.70%     | 5.98%       | 16.3                         | 34,456€                  | 5.29%                                           |
| <b>2014</b>      |              |           |             |                              |                          |                                                 |
| <50 procedures   | 5.34%        | 2.75%     | 5.99%       | 19.9                         | 35,993€                  | 6.15%                                           |
| 50-99 procedures | 4.58%        | 2.20%     | 5.73%       | 18.3                         | 34,904€                  | 4.32%                                           |
| >=100 procedures | 3.70%        | 2.28%     | 4.22%       | 15.3                         | 34,771€                  | 3.92%                                           |

Please note that the numbers of procedures performed per year at a given center were not constant over the observation period, so that it is possible for a center to fall into a different volume group in a different year.



**Figure 1:** Risk-adjusted in-hospital mortality, stroke, bleeding and ventilation rates and their association with center-specific procedure volumes in a given year.

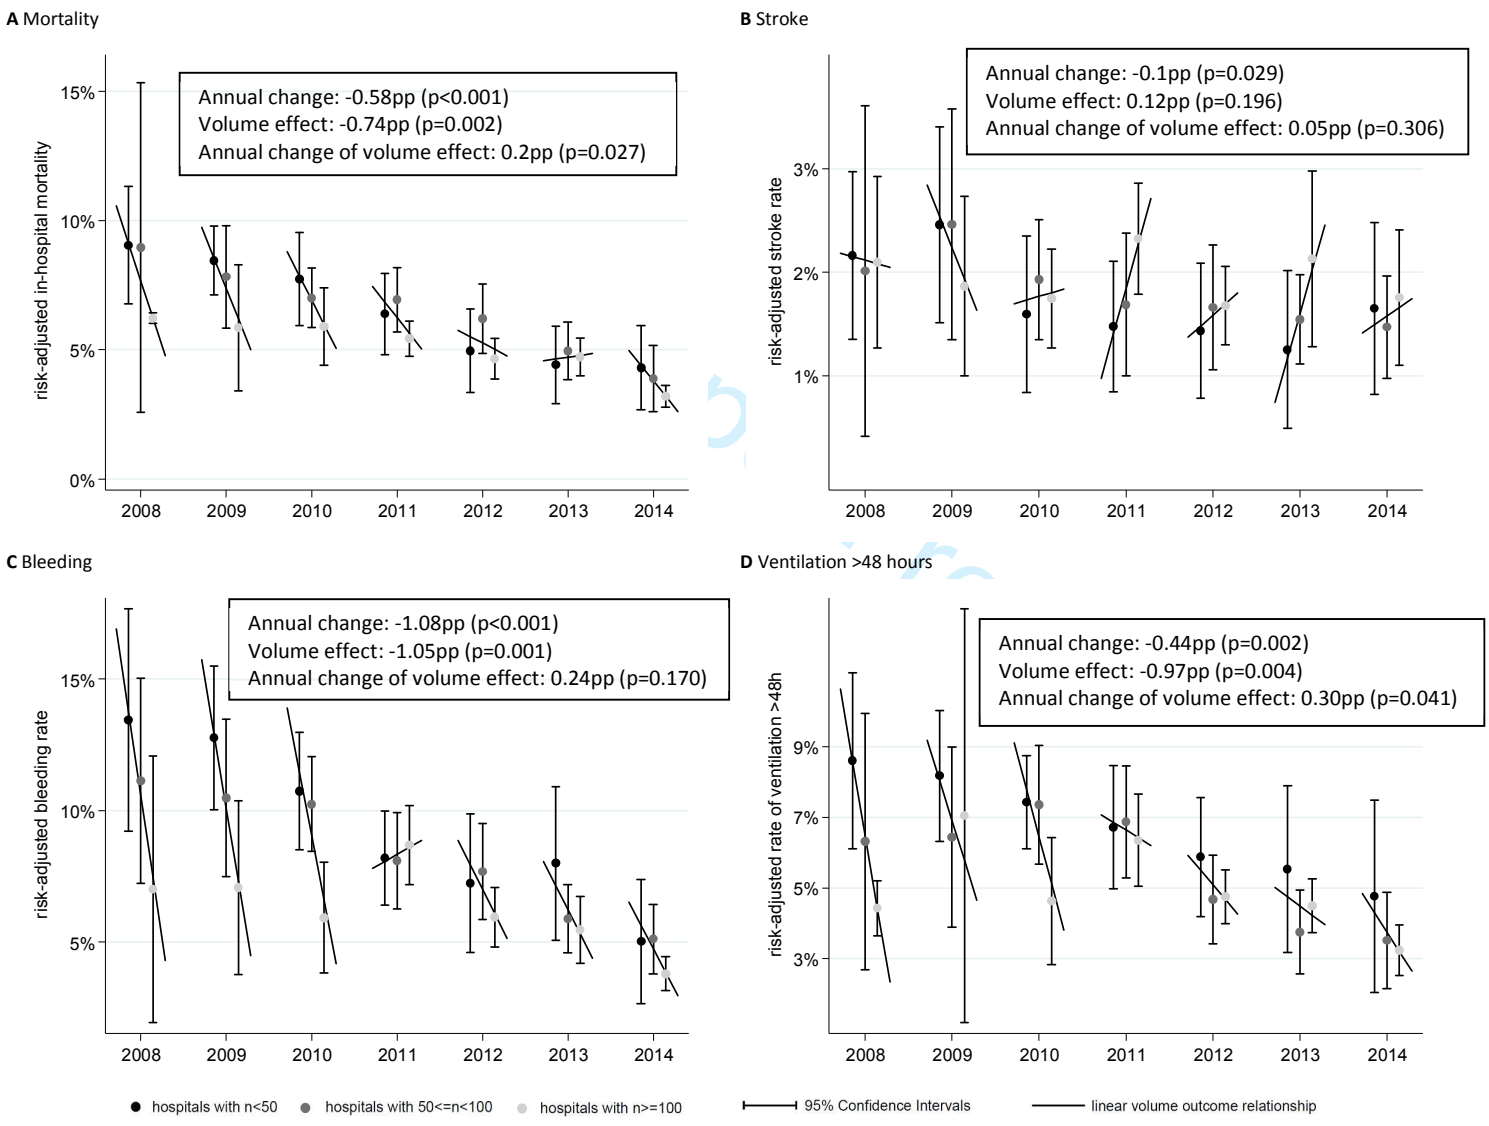

Estimates are based on risk-adjusted logistic regression analysis including all available patient characteristics as confounders (see Table 1). Predicted probabilities are calculated by setting each confounder to its mean value (prediction at the means, see Table 1 for means). Annual and volume effects were calculated using random effects meta regression based on the estimated rates. A separate model with an interaction term was used to assess the change in the volume-outcome relationship. pp= percentage points

**Figure 2:** Risk-adjusted in-hospital length of stay and reimbursement and their association with center-specific procedure volumes in a given year.

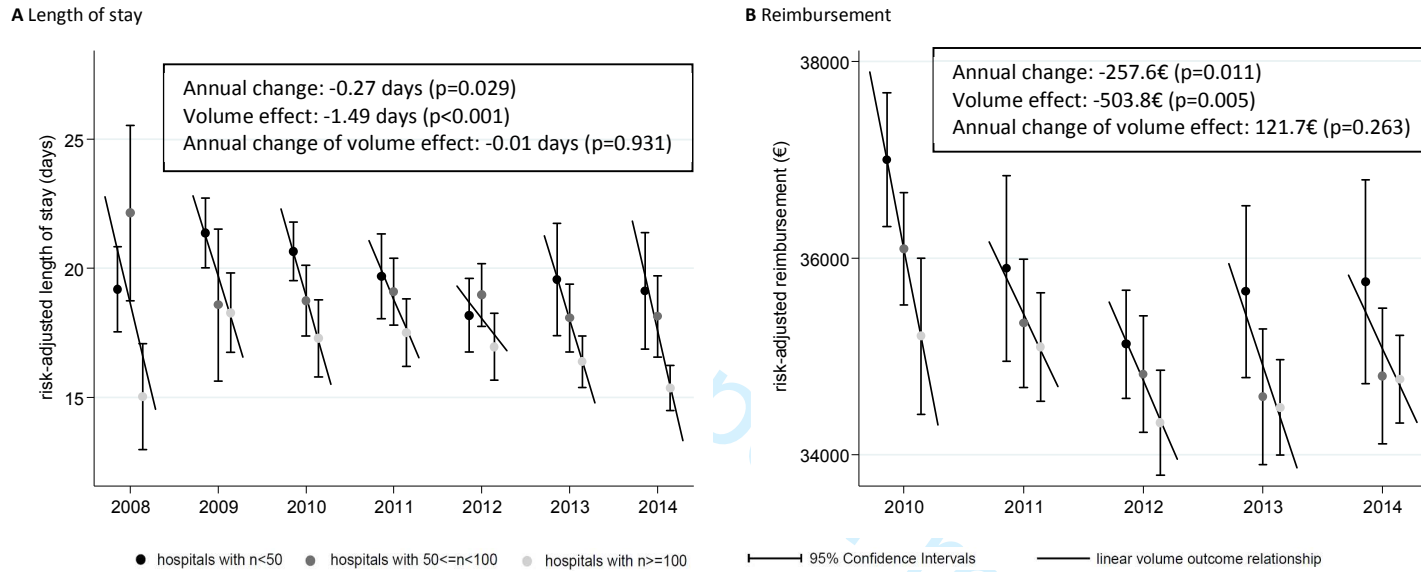

Estimates are based on risk-adjusted linear regression analyses including all available patient characteristics as confounders (see Table 1). Predicted probabilities are calculated by setting each confounder to its mean value (prediction at the means, see Table 1 for means). Annual and volume effects were calculated using random effects meta regression based on the estimated means. A separate a model with an interaction term was used to assess the change in the volume-outcome relationship.

Table S1: Results of the logistic regression model, transformation into discrete event probabilities and subsequent meta regressions

**First step:** Logistic regression model on 43,996 TAVI cases with in-hospital mortality as dependent variable, an interaction term (n\_ik\_year\_50\_100#year) between categorical time (in years) and volume categories and 22 predefined patient and procedural characteristics as potential confounder.

| n_ik_year_50_100               | OR    | p-value | 95% CI        |
|--------------------------------|-------|---------|---------------|
| procedure volume <50           | 1.000 |         |               |
| procedure volume 50-99         | 0.989 | 0.98    | 0.437 - 2.241 |
| procedure volume >=100         | 0.668 | 0.004   | 0.506 - 0.882 |
| year                           |       |         |               |
| 2008                           | 1.000 |         |               |
| 2009                           | 0.929 | 0.671   | 0.661 - 1.305 |
| 2010                           | 0.844 | 0.376   | 0.579 - 1.229 |
| 2011                           | 0.686 | 0.032   | 0.486 - 0.968 |
| 2012                           | 0.525 | 0.004   | 0.340 - 0.812 |
| 2013                           | 0.465 | 0.001   | 0.302 - 0.718 |
| 2014                           | 0.453 | 0.001   | 0.288 - 0.712 |
| n_ik_year_50_100#year          |       |         |               |
| procedure volume 50-99 # 2009  | 0.929 | 0.874   | 0.376 - 2.298 |
| procedure volume 50-99 # 2010  | 0.909 | 0.828   | 0.384 - 2.151 |
| procedure volume 50-99 # 2011  | 1.105 | 0.822   | 0.464 - 2.631 |
| procedure volume 50-99 # 2012  | 1.280 | 0.597   | 0.512 - 3.202 |
| procedure volume 50-99 # 2013  | 1.141 | 0.781   | 0.452 - 2.877 |
| procedure volume 50-99 # 2014  | 0.908 | 0.845   | 0.346 - 2.385 |
| procedure volume >=100 # 2009  | 1.007 | 0.981   | 0.583 - 1.740 |
| procedure volume >=100 # 2010  | 1.120 | 0.598   | 0.735 - 1.705 |
| procedure volume >=100 # 2011  | 1.260 | 0.223   | 0.869 - 1.827 |
| procedure volume >=100 # 2012  | 1.399 | 0.164   | 0.872 - 2.244 |
| procedure volume >=100 # 2013  | 1.606 | 0.046   | 1.009 - 2.558 |
| procedure volume >=100 # 2014  | 1.100 | 0.687   | 0.692 - 1.749 |
| Female                         | 0.902 | 0.045   | 0.815 - 0.998 |
| Age in years                   | 1.009 | 0.155   | 0.997 - 1.022 |
| Estimated logistic EuroSCORE   | 1.022 | 0.000   | 1.015 - 1.029 |
| Aortic valve stenosis          | 0.636 | 0.000   | 0.504 - 0.802 |
| Combined aortic valve diseases | 0.553 | 0.000   | 0.447 - 0.685 |
| NYHA II                        | 0.551 | 0.000   | 0.423 - 0.717 |
| NYHA III or IV                 | 1.550 | 0.000   | 1.264 - 1.900 |
| CAD                            | 1.034 | 0.517   | 0.934 - 1.144 |
| Hypertension                   | 0.698 | 0.000   | 0.612 - 0.797 |
| Previous MI (within 4 months)  | 0.683 | 0.048   | 0.467 - 0.997 |
| Previous MI (within 1 year)    | 1.042 | 0.881   | 0.608 - 1.785 |
| Previous MI (after 1 year)     | 0.979 | 0.816   | 0.821 - 1.169 |
| Previous CABG                  | 1.017 | 0.884   | 0.809 - 1.278 |
| Previous cardiac surgery       | 0.808 | 0.117   | 0.619 - 1.055 |
| Peripheral vascular disease    | 1.118 | 0.140   | 0.964 - 1.295 |
| Carotid disease                | 0.896 | 0.165   | 0.768 - 1.046 |
| COPD                           | 0.979 | 0.744   | 0.863 - 1.111 |
| Pulmonary hypertension         | 0.852 | 0.021   | 0.744 - 0.976 |
| GFR <15%                       | 1.770 | 0.000   | 1.443 - 2.170 |
| GFR <30%                       | 1.414 | 0.000   | 1.167 - 1.714 |
| Atrial fibrillation            | 1.211 | 0.000   | 1.115 - 1.315 |
| Diabetes                       | 1.024 | 0.640   | 0.926 - 1.133 |

**Second step:** Predicted probabilities are calculated by setting each confounder to its mean value (prediction at the means) using Stata's margins command with application of the atmeans option.

| n_ik_year_50_100#year         | Prob. | p-value | 95% CI        |
|-------------------------------|-------|---------|---------------|
| procedure volume <50 # 2008   | 0.090 | 0.000   | 0.068 - 0.113 |
| procedure volume <50 # 2009   | 0.085 | 0.000   | 0.071 - 0.098 |
| procedure volume <50 # 2010   | 0.077 | 0.000   | 0.059 - 0.095 |
| procedure volume <50 # 2011   | 0.064 | 0.000   | 0.048 - 0.08  |
| procedure volume <50 # 2012   | 0.050 | 0.000   | 0.033 - 0.066 |
| procedure volume <50 # 2013   | 0.044 | 0.000   | 0.029 - 0.059 |
| procedure volume <50 # 2014   | 0.043 | 0.000   | 0.027 - 0.059 |
| procedure volume 50-99 # 2008 | 0.090 | 0.006   | 0.026 - 0.153 |
| procedure volume 50-99 # 2009 | 0.078 | 0.000   | 0.058 - 0.098 |
| procedure volume 50-99 # 2010 | 0.070 | 0.000   | 0.059 - 0.082 |
| procedure volume 50-99 # 2011 | 0.069 | 0.000   | 0.057 - 0.082 |
| procedure volume 50-99 # 2012 | 0.062 | 0.000   | 0.049 - 0.076 |
| procedure volume 50-99 # 2013 | 0.050 | 0.000   | 0.038 - 0.061 |
| procedure volume 50-99 # 2014 | 0.039 | 0.000   | 0.026 - 0.052 |
| procedure volume >=100 # 2008 | 0.062 | 0.000   | 0.06 - 0.064  |
| procedure volume >=100 # 2009 | 0.058 | 0.000   | 0.034 - 0.083 |
| procedure volume >=100 # 2010 | 0.059 | 0.000   | 0.044 - 0.074 |
| procedure volume >=100 # 2011 | 0.054 | 0.000   | 0.047 - 0.061 |
| procedure volume >=100 # 2012 | 0.047 | 0.000   | 0.039 - 0.054 |
| procedure volume >=100 # 2013 | 0.047 | 0.000   | 0.040 - 0.055 |
| procedure volume >=100 # 2014 | 0.032 | 0.000   | 0.028 - 0.036 |

**Third step:** A random effects meta regression (using Stata's command metareg) with time and volume as continuous covariates was applied to the estimated rates.

|               |         |       |           |
|---------------|---------|-------|-----------|
| Volume effect | -0.0074 | 0.002 | - -0.0031 |
| Annual change | -0.0058 | 0.000 | - -0.0041 |

**Fourth step:** A second random effects meta regression model was applied including also an interaction term.

|               |         |       |           |
|---------------|---------|-------|-----------|
| Volume effect | -4.5364 | 0.026 | - -0.5997 |
| Annual change | -0.0113 | 0.000 | - -0.0061 |

|                                |        |       |          |
|--------------------------------|--------|-------|----------|
| Annual change of volume effect | 0.0023 | 0.027 | - 0.0042 |
|--------------------------------|--------|-------|----------|

# BMJ Open

## Volume-outcome relationship in transcatheter aortic valve implantations in Germany 2008-2014: A secondary data analysis of electronic health records

|                                 |                                                                                                                                                                                                                                                                                                                                                                                                                                                                                                                                                                                                                                                                                                                                                                                                                                                                                                                                                                                                                                                                                           |
|---------------------------------|-------------------------------------------------------------------------------------------------------------------------------------------------------------------------------------------------------------------------------------------------------------------------------------------------------------------------------------------------------------------------------------------------------------------------------------------------------------------------------------------------------------------------------------------------------------------------------------------------------------------------------------------------------------------------------------------------------------------------------------------------------------------------------------------------------------------------------------------------------------------------------------------------------------------------------------------------------------------------------------------------------------------------------------------------------------------------------------------|
| Journal:                        | <i>BMJ Open</i>                                                                                                                                                                                                                                                                                                                                                                                                                                                                                                                                                                                                                                                                                                                                                                                                                                                                                                                                                                                                                                                                           |
| Manuscript ID                   | bmjopen-2017-020204.R1                                                                                                                                                                                                                                                                                                                                                                                                                                                                                                                                                                                                                                                                                                                                                                                                                                                                                                                                                                                                                                                                    |
| Article Type:                   | Research                                                                                                                                                                                                                                                                                                                                                                                                                                                                                                                                                                                                                                                                                                                                                                                                                                                                                                                                                                                                                                                                                  |
| Date Submitted by the Author:   | 05-Mar-2018                                                                                                                                                                                                                                                                                                                                                                                                                                                                                                                                                                                                                                                                                                                                                                                                                                                                                                                                                                                                                                                                               |
| Complete List of Authors:       | <p>Kaier, Klaus; Medical Center-University of Freiburg, Institute for Medical Biometry and Statistics<br/> Oettinger, Vera; Heart Center Freiburg University, Department of Cardiology and Angiology I<br/> Reinecke, H; University of Muenster, Department of Cardiology and Angiology, Adult Congenital and Valvular Heart Disease Center Muenster<br/> Schmoor, Claudia; Medical Centre, University of Freiburg<br/> Frankenstein, L.; University of Heidelberg, Dpt. of Cardiology, Angiology, Pulmology<br/> Vach, Werner; Institute of Medical Biometry and Medical Informatics, Hehn, Philip; Faculty of Medicine and Medical Center – University of Freiburg<br/> von zur Mühlen, Constantin; Heart Center Freiburg University, Department of Cardiology and Angiology I<br/> Bode, Christoph; Heart Center Freiburg University, Department of Cardiology and Angiology I<br/> Zehender, Manfred; Heart Center Freiburg University, Department of Cardiology and Angiology I<br/> Reinöhl, Jochen; Heart Center Freiburg University, Department of Cardiology and Angiology I</p> |
| <b>Primary Subject Heading</b>: | Cardiovascular medicine                                                                                                                                                                                                                                                                                                                                                                                                                                                                                                                                                                                                                                                                                                                                                                                                                                                                                                                                                                                                                                                                   |
| Secondary Subject Heading:      | Health economics                                                                                                                                                                                                                                                                                                                                                                                                                                                                                                                                                                                                                                                                                                                                                                                                                                                                                                                                                                                                                                                                          |
| Keywords:                       | Valvular heart disease < CARDIOLOGY, HEALTH ECONOMICS, CARDIOLOGY, Adult cardiology < CARDIOLOGY                                                                                                                                                                                                                                                                                                                                                                                                                                                                                                                                                                                                                                                                                                                                                                                                                                                                                                                                                                                          |
|                                 |                                                                                                                                                                                                                                                                                                                                                                                                                                                                                                                                                                                                                                                                                                                                                                                                                                                                                                                                                                                                                                                                                           |

SCHOLARONE™  
Manuscripts

# Volume-outcome relationship in transcatheter aortic valve implantations in Germany 2008-2014: A secondary data analysis of electronic health records

Klaus Kaier, PhD<sup>1,2</sup>; Vera Oettinger<sup>2</sup>; Holger Reinecke, MD<sup>3</sup>; Claudia Schmoor, PhD<sup>4</sup>; Lutz Frankenstein, MD<sup>5</sup>; Werner Vach, PhD<sup>1,6</sup>; Philip Hehn<sup>1</sup>; Constantin von zur Mühlen, MD<sup>2</sup>; Christoph Bode, MD<sup>2</sup>; Manfred Zehender, MD, PhD<sup>2</sup>; Jochen Reinöhl, MD<sup>2</sup>

<sup>1</sup> Institute of Medical Biometry and Statistics, Faculty of Medicine and Medical Center – University of Freiburg, Germany

<sup>2</sup> Department of Cardiology and Angiology I, Heart Center Freiburg University, Germany

<sup>3</sup> Division of Vascular Medicine, Department of Cardiovascular Medicine, University Hospital Muenster, Germany

<sup>4</sup> Clinical Trials Unit, Medical Center – University of Freiburg, Germany

<sup>5</sup> Department of Cardiology, Angiology, Pulmonology, University of Heidelberg, Germany

<sup>6</sup> Department of Orthopaedics and Traumatology, University Hospital Basel, Switzerland

## Corresponding author:

Klaus Kaier, PhD

Medical Center – University of Freiburg, Institute of Medical Biometry and Statistics

Stefan-Meier-Str. 26

79104 Freiburg, Germany

phone: + 49 (0)761 203-6807

e-mail: [kaier@imbi.uni-freiburg.de](mailto:kaier@imbi.uni-freiburg.de)

Word count excluding title page, abstract, references, figures and tables: 2947

**ABSTRACT**

**Keywords:** TAVI, volume-outcome; minimum volume standards; hospital quality; mortality

**Objectives:** We examine the volume-outcome relationship in isolated transcatheter aortic valve implantations (TAVI). Our interest was whether the volume-outcome relationship for TAVI exists on the center level, whether it occurs equally for different outcomes, and how it develops over time.

**Design:** Secondary data analysis of electronic health records. The comprehensive German Federal Bureau of Statistics DRG database was queried for data on all isolated TAVI procedures performed in Germany between 2008 and 2014. Logistic and linear regression analyses were carried out. Risk-adjustment was applied using a predefined set of patient characteristics to account for differences in the risk factor composition of the patient populations between centers and over time. Centers performing TAVI were stratified into groups performing <50, 50-99, and  $\geq 100$  procedures per year.

**Setting:** Germany 2008 - 2014.

**Participants:** All patients undergoing isolated TAVI in the observation period.

**Interventions:** none.

**Primary and secondary outcome measures:** In-hospital mortality, bleeding, stroke, probability of ventilation >48 hours, length of hospital stay, and reimbursement.

**Results:** Between 2008 and 2014, a total of 43,996 TAVI procedures were performed in 113 different centers in Germany with a total of 2,532 cases of in-hospital mortality. Risk-adjusted in-hospital mortality decreases over the years and is lower the higher the annual procedure volume at the center is. The magnitude of the latter effect declines over the observation period. Our results indicate a ceiling effect in the volume-outcome relationship: The volume-outcome relationship is eminent in circumstances of relatively unfavorable outcomes. Alongside improving outcomes, however, the volume-outcome relationship decreases. Also, a volume-outcome relationship seems to be absent in circumstances of constantly low event rates.

**Conclusions:** The hypothesized volume-outcome relationship for TAVI exists but diminishes and may disappear over time. This might be the case for other interventional procedures, too, which should be taken into account when considering mandatory minimum thresholds.

## STRENGTHS AND LIMITATIONS OF THIS STUDY

- Study based on administrative data; coding errors are inevitable. However, about 20% of all cardiovascular diagnosis-related groups are reviewed by independent teams of physicians on behalf of the health insurers.
- Risk-adjustment included a number of parameters whose reliability cannot be fully secured, and we cannot guarantee that all parameters of relevance are included in the model. A major limitation is that the data source does not include information on the type of device used in individual TAVI procedures. In addition, information regarding the experience of surgeons at each centre would be highly relevant for the analysis but is unavailable.
- Hospital volume was classified into three fixed categories (<50, 50-99, >=100), which is in line with thresholds mentioned in official guidelines and previously applied in the literature. Possible effects related to very high volumes, however, might be hidden in the analyzed group of patients treated in hospitals with >=100 cases per year.
- The dataset omits patients with a baseline diagnosis of pure aortic regurgitation, as well as those who underwent TAVI with any other concomitant cardiac procedure. This makes sense from a clinical perspective, but further complicates direct comparisons with other administrative datasets.
- The study provides comprehensive data on everyday TAVI practice in a large industrialized country over a multiyear period.

## KEY QUESTIONS

### What is already known about this subject?

After their introduction, outcomes of new interventions are subject to a learning curve effect, meaning that outcomes improve over a period of time and then level off. The volume of procedures performed at an institution can influence this process, and is thought to have some effect on patient outcomes even after learning is complete (volume-outcome-hypothesis).

### What does this study add?

1  
2  
3 This study tracks patient outcomes by center procedure volume in all transcatheter aortic valve  
4 implantation (TAVI) procedures performed in Germany between the procedure's introduction in 2008 and  
5 2014, providing empirical evidence on shape and extent of the above described effects for this procedure.  
6  
7

### 8 9 **How might this impact on clinical practice?**

10  
11  
12 This data is of interest to clinical practitioners, hospital administrators, and policy makers involved in the  
13 implementation of new clinical procedures.  
14

### 15 16 **COMPETING INTERESTS AND FUNDING**

17  
18 The authors declare no conflicts of interest. There was no external funding for this work.  
19

### 20 21 **DATA SHARING STATEMENT**

22  
23 No additional data available.  
24

### 25 26 **AUTHORSHIP STATEMENT**

27  
28 KK and JR developed the research question and designed the methodology. VÖ, HR, LF, CvzM, CB, MZ  
29 and JR provided the medical knowledge of German TAVI practice informing the study design. KK defined  
30 the categories, outcomes and measures and developed and implemented the formal analysis and  
31 statistical with support by WV and CS. KK and JR collected the data and evidence. KK, VÖ, and WV  
32 interpreted and contextualized the results. KK and PH wrote the initial draft of the article, with JR  
33 contributing. All authors participated in the critical revision of the article and provided final approval of the  
34 version to be published.  
35  
36  
37  
38  
39  
40  
41  
42  
43  
44  
45  
46  
47  
48  
49  
50  
51  
52  
53  
54  
55  
56  
57  
58  
59  
60



## INTRODUCTION

Transcatheter aortic valve implantation (TAVI) is a rapidly evolving technique for therapy of aortic stenosis, with a very early and pronounced utilization in Germany [1]. Previous studies report hospital-specific learning curves with respect to in-hospital outcomes such as procedural success, mortality and clinical complications of varying lengths and magnitudes [2–6]. In general, learning curve effects within and between centers can to some degree be explained by the volume of procedures performed at the center. This relationship can be summed up as the “practice-makes-perfect hypothesis”, according to which quality of care either increases with the number of patients as a result of economies of scale, with a competing explanation of “selective-referral”, according to which higher-quality hospitals attract greater demand and therefore have a greater volume of patients [7,8].

There are a number of criticisms on empirical analyses on the volume-outcome relationship: Many studies lack appropriate adjustment for differences in the risk factor composition of the patient populations between centers [9,10]. Secondly, most studies focus on in-hospital mortality only [11], which is easy to measure, but it is recommended to include additional quality measurements. Finally, most studies divided patients into groups of equal size for analyzing the volume-outcome relationship, which makes it difficult to make use of such results when justifying specific volume thresholds [6,12–14].

Although the evidence regarding the existence of an inverse relationship between the number of TAVI procedures and related outcomes is limited [15,16], medical authorities in Germany and several other countries have issued guidelines calling for minimum numbers of procedures for primary operators performing TAVI [17–20]. There however remains some question whether, firstly, the volume-outcome relationship outlined above exists on the center level regarding TAVI and, secondly, whether or not it takes place in all outcomes and complications equally, and how an existing volume-outcome relationship might change over the years.

To address these questions, we calculated annual procedure volumes for all German hospitals that performed TAVI procedures between January 2008 and December 2014. In order to account for differences in the patient population between high-, medium-, and low-volume centers and over time, we carried out baseline-adjusted regression analyses for the endpoints in-hospital mortality, bleeding, stroke, probability of ventilation >48 hours, length of hospital stay, and reimbursement.

## METHODS

### Data

Since 2005, data on all hospitalizations in Germany have been available for scientific use via the Diagnosis Related Groups (DRG) statistics collected by the Research Data Center of the Federal Bureau of Statistics (DESTATIS). These hospitalization data, including diagnoses and procedures, are a valuable source of representative nationwide data on the in-hospital treatment of patients. This database represents a virtually complete collection of all hospitalizations in German hospitals that are reimbursed according to the DRG system. From this database [1], we have extracted data on 43,996 cases of isolated TAVI for our analysis.

Our study did not involve direct access by the investigators to data on individual patients but only access to summary results provided by the Research Data Center. Therefore, approval by an ethics committee and informed consent were determined not to be required, in accordance with German law. All summary results were anonymized by DESTATIS. In practice, this means that any information allowing the drawing of conclusions regarding a single patient or a specific hospital are censored by DESTATIS to guarantee data protection. Especially the use of the anonymous, persistent "institute indicator of hospitals" is highly restricted in order not to publish any information directly attributable to a single hospital.

As described previously [1,21], we were able to use the OPS codes (OPS codes: 5-35a.0 in 2007 and 5-35a.00, 5-35a.01 from 2008) to identify all TAVI procedures performed (and reimbursed) in Germany between 2008 and 2014. Patients with a baseline diagnosis of pure aortic regurgitation (main or secondary diagnosis other than I35.0, I35.2, I06.0, I06.2) and those with concomitant cardiac surgery or percutaneous coronary intervention were not included in this analysis. Although some concomitant procedures might be informative (a cardiac surgery procedure during the same hospital stay as TAVI might likely represent a complication following a TAVI procedure), these cases cannot be consistently identified in our dataset as, in many cases, concomitant procedures might have taken place in another center. A complete list of procedure codes can be found in Table S1, a more detailed discussion of the data source may be found in a previous manuscript [1,21].

## Patient and Public Involvement

The development of the research question was guided by the intention to provide hospitals and policymakers with empirical evidence that enables them to structure the infrastructure in such a way as to deliver the best possible outcomes to patients. The selected outcome measures represent the most severe complications to the procedure and are of high significance to patient quality of life after the intervention. There was, however, no direct involvement of patients in the design, the recruitment and conduct of the study, nor will the results be disseminated to study participants as the study was based on anonymized administrative data.

## Measures

Regarding the in-hospital complications, bleeding was defined as requiring a transfusion of more than 5 units of red blood cells (RBC). For all other comorbidities and complications the existing anamnestic or acute distinctive codes were used (we have discussed OPS and ICD codes in greater detail previously [21]).

In order to analyze possible effects of the above discussed mandatory minimum quantities, the number of procedures per year and center was categorized (i.e.  $n < 50$ ,  $50 \leq n < 100$ ,  $n \geq 100$ ) on the basis of an anonymous, persistent "institute indicator of hospitals" provided by DESTATIS. These particular thresholds are applied because the minimum number of 50 procedures is often mentioned in official TAVI-guidelines [17–20], and these thresholds are widely applied in the literature [22–24].

The primary outcome was in-hospital mortality. Secondary outcomes include post-procedural complications such as stroke and bleeding events (transfusion of  $\geq 5$  RBC), as well as reimbursement, length of hospital stay and proportion of patients with ventilation  $> 48$ h.

## Statistical analysis

In a first step, multivariate regression analyses were carried out for the different endpoints. In a previous study, Reinöhl et al. [1] identified 21 baseline patient characteristics to describe risk profiles between procedural groups. For risk adjustment, all of these 21 baseline patient characteristics were included as covariates (all covariates listed in Table 1) in the respective regression analyses. In addition, an interaction term between time (in years) and the above mentioned annual volume categories was

1  
2 included in the regression analyses in order to investigate the volume-outcome relationship over the  
3  
4 years.  
5  
6  
7  
8  
9  
10  
11  
12  
13  
14  
15  
16  
17  
18  
19  
20  
21  
22  
23  
24  
25  
26  
27  
28  
29  
30  
31  
32  
33  
34  
35  
36  
37  
38  
39  
40  
41  
42  
43  
44  
45  
46  
47  
48  
49  
50  
51  
52  
53  
54  
55  
56  
57  
58  
59  
60

For peer review only

**Table 1: Baseline characteristics (2008-2014)**

|                                                     |               |
|-----------------------------------------------------|---------------|
| N                                                   | 43,996        |
| Female                                              | 55.87%        |
| Age in years, mean/SD                               | 80.95/6.11    |
| Estimated logistic EuroSCORE <sup>1</sup> , mean/SD | 22.21%/13.57% |
| Aortic valve stenosis as main diagnosis             | 68.22%        |
| Combined aortic valve diseases as main diagnosis    | 26.56%        |
| Heart failure                                       |               |
| NYHA II                                             | 8.26%         |
| NYHA III or IV                                      | 41.66%        |
| Hypertension                                        | 62.66%        |
| CAD                                                 | 46.88%        |
| Previous myocardial infarction                      |               |
| within 4 months                                     | 1.59%         |
| within 1 year                                       | 0.75%         |
| after 1 year                                        | 4.35%         |
| Previous CABG                                       | 12.75%        |
| Previous cardiac surgery                            | 18.06%        |
| Peripheral vascular disease                         | 12.39%        |
| Carotid disease                                     | 6.17%         |
| COPD                                                | 15.14%        |
| Pulmonary hypertension                              | 22.32%        |
| Renal disease                                       |               |
| GFR <15ml/min                                       | 2.95%         |
| GFR <30ml/min                                       | 4.90%         |
| Atrial fibrillation                                 | 45.93%        |
| Diabetes                                            | 33.30%        |

<sup>1</sup>For calculation of the logistic EuroSCORE, we were able to populate all fields except for critical preoperative state and left ventricular function. In these we assumed an inconspicuous state (i.e. no critical preoperative state and no left ventricular dysfunction) and thus calculated a best-case scenario.

Abbreviations: NYHA – New York Heart Association Functional Classification; CAD – coronary artery disease; CABG – coronary artery bypass graft; COPD – chronic obstructive pulmonary disease; GFR – glomerular filtration rate.

Please note that in comparison to the data published by Reinöhl et al., one TA-TAVI procedure (in 2010) needed to be removed from the dataset due to incomplete information.

1  
2  
3 Logistic and linear regression analyses are applied for dichotomous and continuous endpoints,  
4 respectively. The question of how to account for patients treated in the same hospital was discussed  
5 previously [13,25,26]. As recommended in a previous study that also used data from the German DRG-  
6 statistic [13], we used cluster-robust standard errors to account for this dependency.  
7  
8

9  
10 Risk-adjusted rates and means within each year and hospital volume category were obtained by  
11 computing the corresponding predicted probabilities or means, respectively, for an artificial subject with  
12 each confounder set to its mean value (prediction at the means, see Table 1 for mean values of all  
13 confounders). Thereby, risk-adjusted rates and means are taking two aspects into account: (1) change in  
14 the patients risk factors compositions over the years, and (2) differences in the patients risk factors  
15 compositions within different hospital volume categories. Risk-adjusted rates and means are therefore  
16 interpreted as the 'true' procedure-related outcomes independent of changes in the patient population  
17 over the years and differences between low, medium, and high-volume centers. Please note that this  
18 implies the assumption that all outcome relevant parameters are used for risk-adjustment. Unfortunately,  
19 we cannot guarantee that all parameters of relevance are included in the model. In fact, the administrative  
20 dataset lacks relevant clinical information (such as echocardiographic findings or anatomical  
21 characteristics).  
22  
23  
24  
25  
26  
27  
28  
29  
30  
31  
32

33 The visualization of these risk-adjusted rates or means together with their 95% confidence intervals  
34 constitutes the main analytical approach in this paper. To assess the statistical significance of the  
35 observed volume-outcome relationship, of the time trend and a potential change of the volume-outcome  
36 relationship over time, we applied to the estimated rates or means a random effects meta regression  
37 (command metareg [27]) with time and volume as continuous covariates. A model with an interaction term  
38 was used to assess the change in the volume-outcome relationship. A model without an interaction was  
39 used to assess the main effects.  
40  
41  
42  
43  
44  
45

46 Standardized reimbursement data is only available starting in 2010 due to a change in the reimbursement  
47 system making previous data difficult to compare. In Germany, reimbursement is based on DRGs which  
48 are defined by the patients' diagnoses, gender and age, treatment procedures, complications or  
49 comorbidities, and further attributes. Based on this data, a predetermined reimbursement rate per case is  
50 calculated. Hospitals receive additional reimbursement for long-stay outlier cases [28]. Furthermore,  
51  
52  
53  
54  
55  
56  
57  
58  
59  
60

1  
2 additional reimbursement is possible for very complex intensive care treatments, which have to be proven  
3  
4 by documentation of illness severity and treatment effort during ICU stay [29].  
5

6  
7 All analyses were carried out using Stata 13.1 (StataCorp, College Station, Texas, USA).  
8  
9

## 10 **RESULTS**

11  
12 Between 2008 and 2014, a total of 43,996 TAVI procedures were performed in 113 different centers in  
13  
14 Germany. The total number of TAVI procedures performed per year increased markedly over the  
15  
16 observation period, from 1,122 in 2008 to 11,559 in 2014 (see Table 2).  
17  
18  
19  
20  
21  
22  
23  
24  
25  
26  
27  
28  
29  
30  
31  
32  
33  
34  
35  
36  
37  
38  
39  
40  
41  
42  
43  
44  
45  
46  
47  
48  
49  
50  
51  
52  
53  
54  
55  
56  
57  
58  
59  
60

**Table 2: Number of procedures with regard to the performed TAVI volume of a distinct center in a given year.**

| <b>TAVI Volume in Center</b>               | <b>2008</b>            | <b>2009</b>            | <b>2010</b>       | <b>2011</b>       | <b>2012</b>       | <b>2013</b>       | <b>2014</b>        |
|--------------------------------------------|------------------------|------------------------|-------------------|-------------------|-------------------|-------------------|--------------------|
| <50 procedures, n (number of centers)      | 613 (40)               | 1,234 (61)             | 1,155 (51)        | 1,107 (43)        | 960 (36)          | 765 (31)          | 617 (30)           |
| 50-99 procedures, n (number of centers)    | 236 (3)                | 658 (10)               | 1,875 (26)        | 1,957 (27)        | 1,569 (20)        | 1,930 (25)        | 1,135 (16)         |
| >=100 procedures, n (number of centers)    | 273 (n/a*)             | 707 (n/a)              | 1,776 (3)         | 3,459 (7)         | 5,711 (16)        | 6,452 (9)         | 9,807 (20)         |
| <b>Total number, n (number of centers)</b> | <b>1,122 (&gt;=44)</b> | <b>2,599 (&gt;=72)</b> | <b>4,806 (80)</b> | <b>6,523 (77)</b> | <b>8,240 (72)</b> | <b>9,147 (65)</b> | <b>11,559 (66)</b> |

Please note that the numbers of procedures performed per year at a given center were not constant over the observation period, so that it is possible for a center to fall into a different volume group in a different year. Number of centres in parentheses.

\* n/a = not available, exact number censored by DESTATIS due to data protection concerns



1  
2  
3 As reported previously [1], substantial reductions in in-hospital mortality have been achieved between  
4 2008 and 2013, and we find this trend to continue into 2014. Regarding center-specific procedure  
5 volumes of all TAVI procedures, it appears that the differences in unadjusted in-hospital mortality  
6 between the procedure volume groups (<50, 50-99, and >=100) steadily decline over the years (see  
7 Table 3). Figure 1 A provides risk-adjusted in-hospital mortality rates allowing for comparison despite  
8 possible differences in the patient selection process and consequently the risk factor composition  
9 between hospitals in the different procedure volume groups and over time (See Table S2 –Table S7 for  
10 details of the process used to generate the results shown in Figure 1A). These results indicate that risk-  
11 adjusted in-hospital mortality rates (1) steadily decrease over the years (annual change: -0.58 percentage  
12 points (pp),  $p<0.001$ ), are (2) lower the higher the procedure volume at the hospital is (volume effect: -  
13 0.74pp,  $p=0.002$ ), but that (3) this volume effect declines over the seven year observation period ( $p$ -value  
14 of interaction term:  $p=0.027$ ; annual change of volume effect: 0.2pp).  
15  
16  
17  
18  
19  
20  
21  
22  
23  
24  
25  
26  
27  
28  
29  
30  
31  
32  
33  
34  
35  
36  
37  
38  
39  
40  
41  
42  
43  
44  
45  
46  
47  
48  
49  
50  
51  
52  
53  
54  
55  
56  
57  
58  
59  
60

Table 3: Unadjusted in-hospital outcomes with regard to the performed TAVI volume of a distinct center in a given year.

|                  | Mortality, % | Stroke, % | Bleeding, % | Length of stay, mean in days | Reimbursement, mean in € | Proportion of patients with ventilation >48h, % |
|------------------|--------------|-----------|-------------|------------------------------|--------------------------|-------------------------------------------------|
| <b>2008</b>      |              |           |             |                              |                          |                                                 |
| <50 procedures   | 10.11%       | 3.26%     | 14.36%      | 19.2                         |                          | 9.79%                                           |
| 50-99 procedures | 9.32%        | 2.12%     | 11.44%      | 21.8                         |                          | 6.78%                                           |
| >=100 procedures | 6.59%        | 2.56%     | 7.33%       | 14.7                         |                          | 4.76%                                           |
| <b>2009</b>      |              |           |             |                              |                          |                                                 |
| <50 procedures   | 9.81%        | 3.57%     | 14.18%      | 21.6                         |                          | 9.48%                                           |
| 50-99 procedures | 8.36%        | 3.34%     | 11.25%      | 18.5                         |                          | 7.14%                                           |
| >=100 procedures | 6.08%        | 2.12%     | 7.21%       | 18.0                         |                          | 7.36%                                           |
| <b>2010</b>      |              |           |             |                              |                          |                                                 |
| <50 procedures   | 9.00%        | 2.51%     | 12.12%      | 21.0                         | 37,071€                  | 8.74%                                           |
| 50-99 procedures | 8.11%        | 2.56%     | 11.41%      | 19.1                         | 36,173€                  | 8.69%                                           |
| >=100 procedures | 6.14%        | 2.20%     | 6.25%       | 17.0                         | 35,074€                  | 5.01%                                           |
| <b>2011</b>      |              |           |             |                              |                          |                                                 |
| <50 procedures   | 7.68%        | 2.35%     | 9.39%       | 20.0                         | 35,984€                  | 8.04%                                           |
| 50-99 procedures | 8.02%        | 2.35%     | 9.04%       | 19.3                         | 35,424€                  | 8.28%                                           |
| >=100 procedures | 5.87%        | 3.01%     | 9.31%       | 17.3                         | 35,046€                  | 7.29%                                           |
| <b>2012</b>      |              |           |             |                              |                          |                                                 |
| <50 procedures   | 6.15%        | 2.29%     | 8.44%       | 18.7                         | 35,294€                  | 7.29%                                           |
| 50-99 procedures | 7.07%        | 2.42%     | 8.41%       | 18.9                         | 34,798€                  | 5.48%                                           |
| >=100 procedures | 5.03%        | 2.10%     | 6.30%       | 16.7                         | 34,233€                  | 5.39%                                           |
| <b>2013</b>      |              |           |             |                              |                          |                                                 |
| <50 procedures   | 5.49%        | 2.09%     | 9.28%       | 20.2                         | 35,808€                  | 6.93%                                           |
| 50-99 procedures | 5.85%        | 2.33%     | 6.53%       | 18.2                         | 34,650€                  | 4.56%                                           |
| >=100 procedures | 5.29%        | 2.70%     | 5.98%       | 16.3                         | 34,456€                  | 5.29%                                           |
| <b>2014</b>      |              |           |             |                              |                          |                                                 |
| <50 procedures   | 5.34%        | 2.75%     | 5.99%       | 19.9                         | 35,993€                  | 6.15%                                           |
| 50-99 procedures | 4.58%        | 2.20%     | 5.73%       | 18.3                         | 34,904€                  | 4.32%                                           |
| >=100 procedures | 3.70%        | 2.28%     | 4.22%       | 15.3                         | 34,771€                  | 3.92%                                           |

Please note that the numbers of procedures performed per year at a given center were not constant over the observation period, so that it is possible for a center to fall into a different volume group in a different year.

1  
2  
3 Over the seven years of data we analyzed, a slight decreasing trend was visible in the risk-adjusted in-  
4 hospital stroke rate, which started out at 2-2,5% in 2008-2009 and ranged from 1,5-2% in 2013-2014  
5 (Figure 1 B). Volume-outcome relationship was actually negative for years following 2010, with higher-  
6 volume centers having higher stroke rates.  
7  
8

9  
10 Risk-adjusted bleeding rates (Figure 1 C), in contrast, showed a clear beneficial effect of higher center  
11 procedure volumes for all years but 2011. The magnitude of the effect was distinct from 2008-2010 and  
12 decreased in the following years in parallel with an ongoing marked decrease in the general likelihood of  
13 bleeding complications, but still was present in 2013/2014.  
14  
15

16  
17 For risk-adjusted in-hospital ventilation rate (>48h) (Figure 1 D), a pronounced beneficial effect of higher  
18 center procedure volumes persisted throughout the observation period. In addition, risk-adjusted in-  
19 hospital ventilation rates decreased substantially over the years. As for bleeding, the magnitude of the  
20 volume effect was distinct in the first years but steadily declined over the seven year period (annual  
21 change of the volume effect: 0.30pp,  $p=0.041$ ).  
22  
23

24  
25 Risk-adjusted in-hospital length of stay shows a strong beneficial effect of center procedure volume  
26 (Figure 2 A). Unlike the situation found for the endpoints mortality and bleeding, the magnitude of the  
27 effect did not decrease much over the observed timeframe. There also is a slight reduction in average  
28 length of stay over the years.  
29  
30

31  
32 As shown in Figure 2 B, there is a drop in the overall reimbursement level from 2010-2012, but  
33 reimbursement stays roughly the same thereafter. In much the same way as found for length of hospital  
34 stay, risk-adjusted amount of reimbursement decreased only slightly over time, and showed a large  
35 volume effect which did not change over the five year period.  
36  
37  
38  
39  
40  
41  
42  
43  
44

## 45 **CONCLUSIONS**

46  
47 Our study shows mixed results regarding a volume-outcome relationship in TAVI procedures in German  
48 hospitals. First of all, TAVI-related in-hospital mortality decreased substantially between 2008 and 2014  
49 and was lower the higher the procedure volume at the respective hospital is. The magnitude of this  
50 volume-outcome relationship, however, declines over the observation period. Especially in later years  
51 (2012-2014) differences in mortality between low-, medium-, and high-volume centers are small.  
52  
53  
54  
55  
56  
57

1  
2  
3 Regarding in-hospital mortality and secondary endpoints, a volume-outcome relationship is eminent in  
4 circumstances of relatively unfavorable outcomes (see early years of mortality, bleeding, and ventilation)  
5 and decreases as outcomes improve (later years of mortality, bleeding, and ventilation), but is not present  
6 in circumstances of constantly low event rates (see stroke). In addition, in most of the cases when we  
7 observe a distinct annual decrease, we also observe a decreasing volume effect over time. Presumably,  
8 the small centers succeed in participating at the system level learning curve to a degree which allows  
9 them to catch up to some degree to the group of high-volume. Unfortunately, our data does not allow  
10 addressing the question whether this is due to exchange of expertise or to increasing cumulative  
11 experience. The group of small centers may also benefit from there being only a reduced capacity for  
12 improvement even in large volume centers some years after the introduction of a new procedure.  
13  
14

15  
16 Interestingly, decreases in the volume effect over time were not observed for the endpoints of in-hospital  
17 length of stay and reimbursement. Presumably, this might be due to the fact that high-volume centers are  
18 at a major advantage in streamlining clinical workflows before and after the procedure.  
19  
20

21  
22 Two recent studies showed volume-outcome relationships for TAVI procedures performed in US hospitals  
23 in 2012 [15,16]. In both studies, patients were divided into groups of equal sample size. Disregarding the  
24 accompanying problems regarding the external validity of the results [12,13], the results shown in these  
25 studies are similar to ours: Among others, inverse volume-outcome relationships were shown for the  
26 endpoints death and bleeding [15,16]. One of the two studies also included the endpoints length of stay  
27 and hospitalization costs and identified significant differences between the observed hospital volume  
28 quartiles (TAVI/year cutoffs  $\leq 5$ , 6-10, 11-20 and  $>20$ ) [16]. The other study also included the endpoint  
29 stroke and did not show significant differences between volume groups (TAVI cutoffs: 20 or 10 cases for  
30 different access routes) [15].  
31  
32  
33  
34  
35  
36  
37  
38  
39  
40  
41  
42  
43

44  
45 As stated before, medical authorities in several countries have issued guidelines calling for minimum  
46 numbers of procedures for primary operators performing TAVI [17–20]. In Germany, such mandatory  
47 minimums are not yet implemented, but a mandatory number of 50 TAVI procedures annually is officially  
48 recommended [20], and this number is also mentioned in guidelines from the UK, Canada and Portugal  
49 [17–19]. Our results confirm the existence of a volume-outcome relationship for TAVI procedures  
50 between 2008 and 2014, and these effects are in line with existing evidence from TAVI procedures  
51 performed in US hospitals [6,15,16]. The above discussed weakening of the volume-outcome relationship  
52  
53  
54  
55  
56  
57

1  
2  
3 over time, however, relativizes the rationale behind mandatory minimum numbers of procedures: The  
4 volume-outcome relationship may be considerable in the years following the introduction of a new  
5 procedure when there still is a lot of room for improvement (in the two of the cited studies [15,16], i.e.  
6 2012). After a few years, then, the association between procedure numbers and better performance may  
7 diminish (see our results regarding the year 2014 and presumably thereafter). In the worst case, the  
8 volume effect is already gone by the time mandatory minimums are finally implemented, or the  
9 implementation hinders the system to reach optimal health service without restrictions. It should be,  
10 however, noted that the average number of TAVI procedures per hospital is larger in Germany compared  
11 to most other countries, and that hence the time span until such a point is reached may be longer in other  
12 countries.  
13  
14  
15  
16  
17  
18  
19  
20

21 This might be especially problematic since mandatory minimum quantities on the center level are not free  
22 of further disadvantages. They are thought to lead to centralization of procedures in large hospitals,  
23 necessitating costly patient transfers and potentially worse aftercare. In addition, it is unclear how an  
24 optimal threshold could be set (and adjusted yearly) and by whom, how effects of physician volume and  
25 hospital volume should be combined, whether low-volume hospitals and their surgeons perceive the  
26 thresholds as new incentives to operate, and how new and innovative hospitals might be able to enter the  
27 market [30]. The latter question is especially relevant for TAVI since a recent study showed that between  
28 2010 and 2015 a new center entering the TAVI market needed to perform 54 procedures to achieve  
29 clinical outcomes comparable to those reported in high-volume centers [31]. According to the authors of  
30 the study, this represents more than 2 years of continuous activity [31].  
31  
32  
33  
34  
35  
36  
37  
38  
39

40 In addition, the question remains how to integrate the observed volume effects into the existing theory.  
41 The “practice-makes-perfect hypothesis” implies a contrary causal relationship than the theory of  
42 “selective-referral” [7,8], and we cannot answer the question whether volume generates quality (practice  
43 makes perfect), quality generates volume (selective referral), or both.  
44  
45  
46  
47

48 Furthermore, Gandjour et al. differentiated the “practice-makes-perfect hypothesis” into learning curve  
49 effects, economies of scope, and the concept of a focused factory [32]. Improved outcomes may result  
50 from economies of scale: every time doctors perform a procedure, they gain experience. Economies of  
51 scope, in contrast, would occur from the simultaneous performance of dissimilar procedures. In the TAVI  
52 context, this means that a high-volume center might see improved TAVI outcomes as a result of the  
53  
54  
55  
56  
57

1  
2  
3 performance of high numbers of other procedures. Accordingly, Epstein already raised the question  
4 whether similar procedures should also be counted towards a set volume threshold [30]. The focused  
5 factory concept, in contrast, assumes that focusing on a small number of procedures could also be  
6 favorable [32]. Unfortunately, none of the existing approaches analyzed whether the volume-outcome  
7 relationship differs in accordance to the number of other (closely related) procedures conducted in the  
8 respective center.  
9  
10  
11  
12

13  
14 We conclude that the hypothesized volume-outcome relationship for TAVI exists but diminishes and may  
15 disappear over time. This might be the case for other interventional procedures, too, which should be  
16 taken into account when considering mandatory minimum thresholds.  
17  
18  
19  
20  
21  
22  
23  
24  
25  
26  
27  
28  
29  
30  
31  
32  
33  
34  
35  
36  
37  
38  
39  
40  
41  
42  
43  
44  
45  
46  
47  
48  
49  
50  
51  
52  
53  
54  
55  
56  
57  
58  
59  
60

## Figure Legends

**Figure 1:** Risk-adjusted in-hospital mortality, stroke, bleeding and ventilation rates and their association with center-specific procedure volumes in a given year.

Estimates are based on risk-adjusted logistic regression analysis including all available patient characteristics as confounders (see Table 1). Predicted probabilities are calculated by setting each confounder to its mean value (prediction at the means, see Table 1 for means). Annual and volume effects were calculated using random effects meta regression based on the estimated rates. A separate model with an interaction term was used to assess the change in the volume-outcome relationship. pp= percentage points.

**Figure 2:** Risk-adjusted in-hospital length of stay and reimbursement and their association with center-specific procedure volumes in a given year.

Estimates are based on risk-adjusted linear regression analyses including all available patient characteristics as confounders (see Table 1). Predicted probabilities are calculated by setting each confounder to its mean value (prediction at the means, see Table 1 for means). Annual and volume effects were calculated using random effects meta regression based on the estimated means. A separate a model with an interaction term was used to assess the change in the volume-outcome relationship.

## Reference List

1. Reinöhl, J., Kaier, Klaus, Reinecke, Holger, Schmoor, Claudia, Frankenstein, Lutz, Vach, Werner, et al. Effect of Availability of Transcatheter Aortic Valve Replacement on Clinical Practice. *N Engl J Med.* 2015;373:2438–47.
2. Gurvitch R, Tay EL, Wijesinghe N, Ye J, Nietlispach F, Wood DA, et al. Transcatheter aortic valve implantation: lessons from the learning curve of the first 270 high-risk patients. *Catheter Cardiovasc Interv.* 2011;78:977–84.
3. Cerillo AG, Murzi M, Glauber M, Berti S. Quality Control and the Learning Curve of Transcatheter Aortic Valve Implantation. *JACC Cardiovasc Interv.* 2012;5:456.
4. Alli OO, Booker JD, Lennon RJ, Greason KL, Rihal CS, Holmes DR. Transcatheter Aortic Valve Implantation. *JACC Cardiovasc Interv.* 2012;5:72–9.
5. Arai T, Lefèvre T, Hovasse T, Hayashida K, Watanabe Y, O'Connor SA, et al. Evaluation of the learning curve for transcatheter aortic valve implantation via the transfemoral approach. *Int J Cardiol.* 2016;203:491–7.
6. Carroll JD, Vemulapalli S, Dai D, Matsouaka R, Blackstone E, Edwards F, et al. Procedural Experience for Transcatheter Aortic Valve Replacement and Relation to Outcomes. *J Am Coll Cardiol.* 2017;70:29–41.
7. Gaynor M, Seider H, Vogt WB. The volume-outcome effect, scale economies, and learning-by-doing. *Am Econ Rev.* 2005;95:243–7.
8. Luft HS, Hunt SS, Maerki SC. The volume-outcome relationship: practice-makes-perfect or selective-referral patterns? *Health Serv Res.* 1987;22:157–82.
9. Halm EA, Lee C, Chassin MR. Is volume related to outcome in health care? A systematic review and methodologic critique of the literature. *Ann Intern Med.* 2002;137:511–20.
10. Shahian DM, Normand S-LT. The volume-outcome relationship: from Luft to Leapfrog. *Ann Thorac Surg.* 2003;75:1048–58.
11. Barker D, Rosenthal G, Cram P. Simultaneous relationships between procedure volume and mortality: do they bias studies of mortality at specialty hospitals? *Health Econ.* 2011;20:505–18.
12. Christian CK, Gustafson ML, Betensky RA, Daley J, Zinner MJ. The Leapfrog volume criteria may fall short in identifying high-quality surgical centers. *Ann Surg.* 2003;238:447–57.
13. Hentschker C, Mennicken R. The Volume-Outcome Relationship and Minimum Volume Standards—Empirical Evidence for Germany. *Health Econ.* 2015;24:644–58.
14. Reames BN, Ghaferi AA, Birkmeyer JD, Dimick JB. Hospital volume and operative mortality in the modern era. *Ann Surg.* 2014;260:244.
15. Kim LK, Minutello RM, Feldman DN, Swaminathan RV, Bergman G, Singh H, et al. Association between transcatheter aortic valve implantation volume and outcomes in the United States. *Am J Cardiol.* 2015;116:1910–5.



- 1  
2  
3 16. Badheka AO, Patel NJ, Panaich SS, Patel SV, Jhamnani S, Singh V, et al. Effect of hospital volume on  
4 outcomes of transcatheter aortic valve implantation. *Am J Cardiol*. 2015;116:587–94.  
5  
6 17. Webb J, Rodés-Cabau J, Fremes S, Pibarot P, Ruel M, Ibrahim R, et al. Transcatheter Aortic Valve  
7 Implantation: A Canadian Cardiovascular Society Position Statement. *Can J Cardiol*. 2012;28:520–8.  
8  
9 18. British Cardiovascular Intervention Society (BCIS) and the Society of Cardiothoracic Surgeons (SCTS).  
10 A position statement of the British Cardiovascular Intervention Society (BCIS) and the Society of  
11 Cardiothoracic Surgeons (SCTS) [Internet]. 2013 [cited 2015 Nov 12]. Available from:  
12 <http://www.bcis.org.uk/resources/documents/BCIS%20SCTS%20position%20statement.pdf>  
13  
14 19. Campante Teles R, Ribeiro VG, Patrício L, Neves JP, Vouga L, Fragata J, et al. Position statement on  
15 transcatheter aortic valve implantation in Portugal. *Rev Port Cardiol Engl Ed*. 2013;32:801–5.  
16  
17 20. Kuck KH, Eggebrecht H, Figulla HR, Haude M, Katus H, Möllmann H, et al. Qualitätskriterien zur  
18 Durchführung der transvaskulären Aortenklappenimplantation. *Kardiologe*. 2015;9:11–26.  
19  
20 21. Reinöhl, J., K. Kaier, Reinecke H, Schmoor C, Frankenstein, L., Vach, W., et al. Effect of Availability of  
21 Transcatheter Aortic Valve Replacement on Clinical Practice: Supplementary Appendix. *N Engl J Med*.  
22 2015;373:2438–47.  
23  
24 22. Fedeli U, Alba N, Schievano E, Visentin C, Rosato R, Zorzi M, et al. Diffusion of good practices of care  
25 and decline of the association with case volume: the example of breast conserving surgery. *BMC Health*  
26 *Serv Res*. 2007;7:167.  
27  
28 23. Nguyen NT, Paya M, Stevens CM, Mavandadi S, Zainabadi K, Wilson SE. The relationship between  
29 hospital volume and outcome in bariatric surgery at academic medical centers. *Ann Surg*. 2004;240:586–  
30 94.  
31  
32 24. Hollenbeak CS, Rogers AM, Barrus B, Wadiwala I, Cooney RN. Surgical volume impacts bariatric  
33 surgery mortality: a case for centers of excellence. *Surgery*. 2008;144:736–43.  
34  
35 25. Farley DE, Ozminkowski RJ. Volume-outcome relationships and inhospital mortality: the effect of  
36 changes in volume over time. *Med Care*. 1992;30:77–94.  
37  
38 26. Hamilton BH, Hamilton VH. Estimating surgical volume—outcome relationships applying survival  
39 models: accounting for frailty and hospital fixed effects. *Health Econ*. 1997;6:383–95.  
40  
41 27. Harbord RM, Higgins JP. Meta-regression in Stata. *Stata J*. 2008;8:493–519.  
42  
43 28. Quentin W, Geissler A, Scheller-Kreinsen D, Busse R. DRG-type hospital payment in Germany: The G-  
44 DRG system. *Euro Obs*. 2010;12:4–6.  
45  
46 29. Braun J-P, Bause H, Bloos F, Geldner G, Kastrup M, Kuhlen R, et al. Peer reviewing critical care: a  
47 pragmatic approach to quality management. *GMS Ger Med Sci*. 2010;8.  
48  
49 30. Epstein A. Volume and outcome - it is time to move ahead. *N Engl J Med*. 2002;346:1161–4.  
50  
51 31. Lunardi M, Pesarini G, Zivelonghi C, Piccoli A, Geremia G, Ariotti S, et al. Clinical outcomes of  
52 transcatheter aortic valve implantation: from learning curve to proficiency. *Open Heart*.  
53 2016;3:e000420.  
54  
55  
56  
57  
58  
59  
60

1  
2  
3 32. Gandjour A, Lauterbach KW. The practice-makes-perfect hypothesis in the context of other  
4 production concepts in health care. Am J Med Qual. 2003;18:171–5.  
5  
6  
7  
8  
9  
10  
11  
12  
13  
14  
15  
16  
17  
18  
19  
20  
21  
22  
23  
24  
25  
26  
27  
28  
29  
30  
31  
32  
33  
34  
35  
36  
37  
38  
39  
40  
41  
42  
43  
44  
45  
46  
47  
48  
49  
50  
51  
52  
53  
54  
55  
56  
57  
58  
59  
60

For peer review only

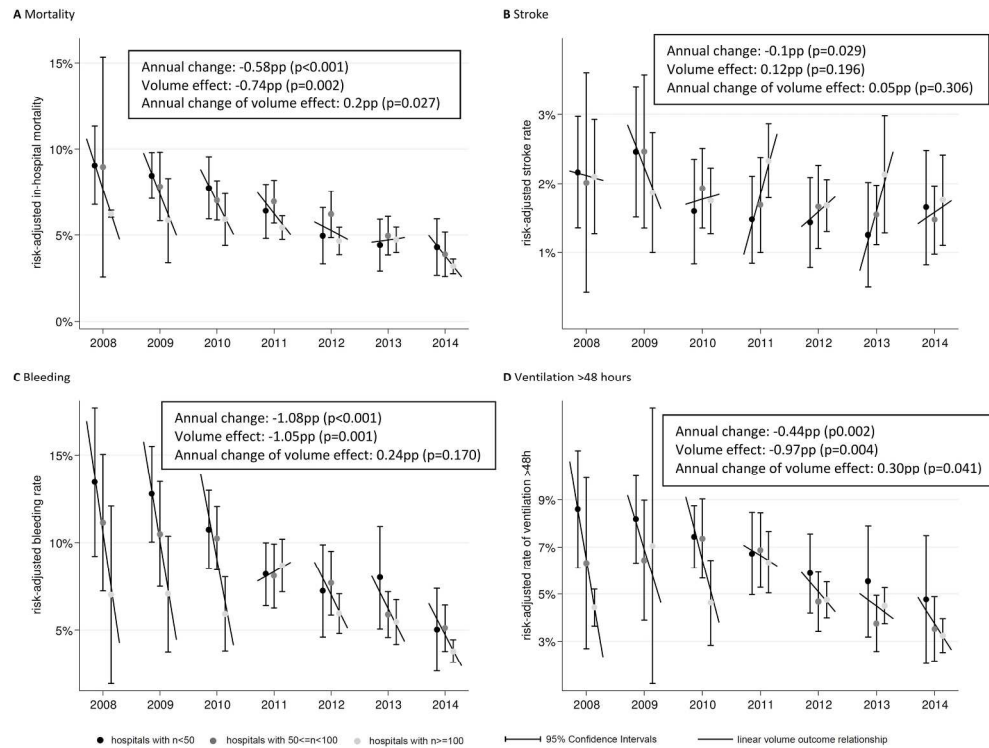

Caption : Figure 1: Risk-adjusted in-hospital mortality, stroke, bleeding and ventilation rates and their association with center-specific procedure volumes in a given year.!! + Estimates are based on risk-adjusted logistic regression analysis including all available patient characteristics as confounders (see Table 1). Predicted probabilities are calculated by setting each confounder to its mean value (prediction at the means, see Table 1 for means). Annual and volume effects were calculated using random effects meta regression based on the estimated rates. A separate model with an interaction term was used to assess the change in the volume-outcome relationship. pp= percentage points.

111x83mm (600 x 600 DPI)

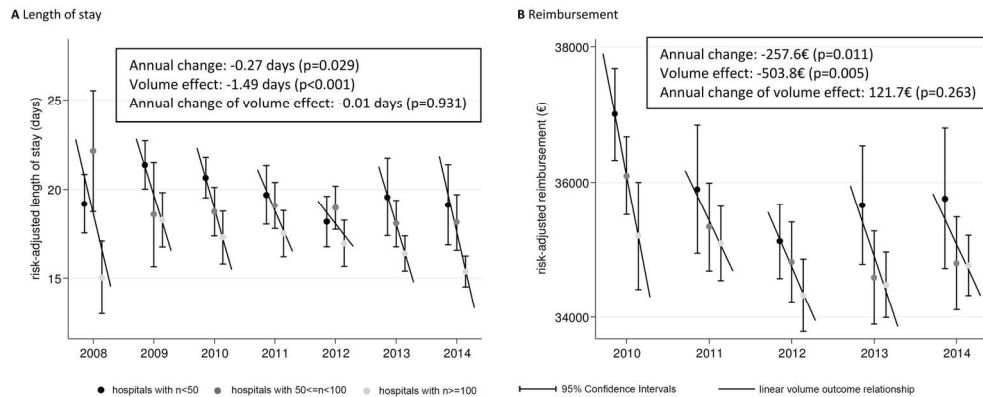

Figure 2: Risk-adjusted in-hospital length of stay and reimbursement and their association with center-specific procedure volumes in a given year.

Estimates are based on risk-adjusted linear regression analyses including all available patient characteristics as confounders (see Table 1). Predicted probabilities are calculated by setting each confounder to its mean value (prediction at the means, see Table 1 for means). Annual and volume effects were calculated using random effects meta regression based on the estimated means. A separate a model with an interaction term was used to assess the change in the volume-outcome relationship.

81x32mm (600 x 600 DPI)

Table S1: Diagnosis and procedure codes used for this analysis

| OPS codes                            |                                                                                                                                   |
|--------------------------------------|-----------------------------------------------------------------------------------------------------------------------------------|
| 5-351.0*                             | Surgical aortic valve replacement                                                                                                 |
| 5-35a.0*                             | Transcatheter aortic valve replacement                                                                                            |
| 5-361.*, 5-362.*, 5-363.*            | Coronary artery bypass graft                                                                                                      |
| 5-351.1*, 5-351.2*, 5-353.1, 5-353.2 | Surgical mitral valve replacement/reconstruction                                                                                  |
| 5-351.4*                             | Surgical tricuspid valve replacement                                                                                              |
| 5-377.0 et seqq.                     | Permanent pacemaker implantation                                                                                                  |
| 8-800.7*<br>since 2010:<br>8-800.c*  | Transfusion of RBC                                                                                                                |
| Diagnosis                            |                                                                                                                                   |
| I35.0, I06.0                         | Aortic valve stenosis (degenerative/rheumatic)                                                                                    |
| I35.2, I06.2                         | Combined aortic valve diseases (degenerative/rheumatic)                                                                           |
| I50.1*                               | Left ventricular congestive heart failure ( <i>according to NYHA classes</i> )                                                    |
| I10*                                 | Arterial Hypertension                                                                                                             |
| I25.11, I25.12, I25.13               | Coronary artery disease                                                                                                           |
| I25.20, I25.21, I25.22               | Previous myocardial infarction ( <i>within 4 months/1 year/after 1 year</i> )                                                     |
| Z95.1                                | Previous coronary artery bypass graft                                                                                             |
| Z95.1 – Z95.4                        | Previous cardiac surgery                                                                                                          |
| I70.20-I70.25, I70.8, I70.9, I73.9   | Peripheral vascular disease                                                                                                       |
| I65.2                                | Carotid disease                                                                                                                   |
| I21*                                 | Acute myocardial infarction ( <i>within the last 28 days</i> )                                                                    |
| J44*                                 | Chronic obstructive pulmonary disease                                                                                             |
| I27*                                 | Pulmonary hypertension                                                                                                            |
| N18*                                 | Renal disease                                                                                                                     |
| N17*                                 | Acute kidney injury                                                                                                               |
| I48.1*                               | Atrial fibrillation                                                                                                               |
| E10* - E14*                          | Diabetes                                                                                                                          |
| I63*, I64                            | Stroke or cerebral infarction incl. occlusion and stenosis of cerebral and precerebral arteries, resulting in cerebral infarction |

Table S2: Results of the logistic regression model, transformation into discrete event probabilities and subsequent meta regressions

**First step:** Logistic regression model on 43,996 TAVI cases with in-hospital mortality as dependent variable, an interaction term (n\_ik\_year\_50\_100#year) between categorical time (in years) and volume categories and 22 predefined patient and procedural characteristics as potential confounder.

| n_ik_year_50_100               | OR    | p-value | 95% CI        |
|--------------------------------|-------|---------|---------------|
| procedure volume <50           | 1     |         |               |
| procedure volume 50-99         | 0.989 | 0.98    | 0.437 - 2.241 |
| procedure volume >=100         | 0.668 | 0.004   | 0.506 - 0.882 |
| year                           |       |         |               |
| 2008                           | 1     |         |               |
| 2009                           | 0.929 | 0.671   | 0.661 - 1.305 |
| 2010                           | 0.844 | 0.376   | 0.579 - 1.229 |
| 2011                           | 0.686 | 0.032   | 0.486 - 0.968 |
| 2012                           | 0.525 | 0.004   | 0.340 - 0.812 |
| 2013                           | 0.465 | 0.001   | 0.302 - 0.718 |
| 2014                           | 0.453 | 0.001   | 0.288 - 0.712 |
| n_ik_year_50_100#year          |       |         |               |
| procedure volume 50-99 # 2009  | 0.929 | 0.874   | 0.376 - 2.298 |
| procedure volume 50-99 # 2010  | 0.909 | 0.828   | 0.384 - 2.151 |
| procedure volume 50-99 # 2011  | 1.105 | 0.822   | 0.464 - 2.631 |
| procedure volume 50-99 # 2012  | 1.280 | 0.597   | 0.512 - 3.202 |
| procedure volume 50-99 # 2013  | 1.141 | 0.781   | 0.452 - 2.877 |
| procedure volume 50-99 # 2014  | 0.908 | 0.845   | 0.346 - 2.385 |
| procedure volume >=100 # 2009  | 1.007 | 0.981   | 0.583 - 1.740 |
| procedure volume >=100 # 2010  | 1.120 | 0.598   | 0.735 - 1.705 |
| procedure volume >=100 # 2011  | 1.260 | 0.223   | 0.869 - 1.827 |
| procedure volume >=100 # 2012  | 1.399 | 0.164   | 0.872 - 2.244 |
| procedure volume >=100 # 2013  | 1.606 | 0.046   | 1.009 - 2.558 |
| procedure volume >=100 # 2014  | 1.100 | 0.687   | 0.692 - 1.749 |
| Female                         | 0.902 | 0.045   | 0.815 - 0.998 |
| Age in years                   | 1.009 | 0.155   | 0.997 - 1.022 |
| Estimated logistic EuroSCORE   | 1.022 | 0.000   | 1.015 - 1.029 |
| Aortic valve stenosis          | 0.636 | 0.000   | 0.504 - 0.802 |
| Combined aortic valve diseases | 0.553 | 0.000   | 0.447 - 0.685 |
| NYHA II                        | 0.551 | 0.000   | 0.423 - 0.717 |
| NYHA III or IV                 | 1.550 | 0.000   | 1.264 - 1.900 |
| CAD                            | 1.034 | 0.517   | 0.934 - 1.144 |
| Hypertension                   | 0.698 | 0.000   | 0.612 - 0.797 |
| Previous MI (within 4 months)  | 0.683 | 0.048   | 0.467 - 0.997 |
| Previous MI (within 1 year)    | 1.042 | 0.881   | 0.608 - 1.785 |
| Previous MI (after 1 year)     | 0.979 | 0.816   | 0.821 - 1.169 |
| Previous CABG                  | 1.017 | 0.884   | 0.809 - 1.278 |
| Previous cardiac surgery       | 0.808 | 0.117   | 0.619 - 1.055 |
| Peripheral vascular disease    | 1.118 | 0.140   | 0.964 - 1.295 |
| Carotid disease                | 0.896 | 0.165   | 0.768 - 1.046 |
| COPD                           | 0.979 | 0.744   | 0.863 - 1.111 |
| Pulmonary hypertension         | 0.852 | 0.021   | 0.744 - 0.976 |
| GFR <15%                       | 1.770 | 0.000   | 1.443 - 2.170 |
| GFR <30%                       | 1.414 | 0.000   | 1.167 - 1.714 |
| Atrial fibrillation            | 1.211 | 0.000   | 1.115 - 1.315 |
| Diabetes                       | 1.024 | 0.640   | 0.926 - 1.133 |

**Second step:** Predicted probabilities are calculated by setting each confounder to its mean value (prediction at the means) using Stata's margins command with application of the atmeans option.

| n_ik_year_50_100#year         | Prob. | p-value | 95% CI        |
|-------------------------------|-------|---------|---------------|
| procedure volume <50 # 2008   | 0.090 | 0.000   | 0.068 - 0.113 |
| procedure volume <50 # 2009   | 0.085 | 0.000   | 0.071 - 0.098 |
| procedure volume <50 # 2010   | 0.077 | 0.000   | 0.059 - 0.095 |
| procedure volume <50 # 2011   | 0.064 | 0.000   | 0.048 - 0.08  |
| procedure volume <50 # 2012   | 0.050 | 0.000   | 0.033 - 0.066 |
| procedure volume <50 # 2013   | 0.044 | 0.000   | 0.029 - 0.059 |
| procedure volume <50 # 2014   | 0.043 | 0.000   | 0.027 - 0.059 |
| procedure volume 50-99 # 2008 | 0.090 | 0.006   | 0.026 - 0.153 |
| procedure volume 50-99 # 2009 | 0.078 | 0.000   | 0.058 - 0.098 |
| procedure volume 50-99 # 2010 | 0.070 | 0.000   | 0.059 - 0.082 |
| procedure volume 50-99 # 2011 | 0.069 | 0.000   | 0.057 - 0.082 |
| procedure volume 50-99 # 2012 | 0.062 | 0.000   | 0.049 - 0.076 |
| procedure volume 50-99 # 2013 | 0.050 | 0.000   | 0.038 - 0.061 |
| procedure volume 50-99 # 2014 | 0.039 | 0.000   | 0.026 - 0.052 |
| procedure volume >=100 # 2008 | 0.062 | 0.000   | 0.060 - 0.064 |
| procedure volume >=100 # 2009 | 0.058 | 0.000   | 0.034 - 0.083 |
| procedure volume >=100 # 2010 | 0.059 | 0.000   | 0.044 - 0.074 |
| procedure volume >=100 # 2011 | 0.054 | 0.000   | 0.047 - 0.061 |
| procedure volume >=100 # 2012 | 0.047 | 0.000   | 0.039 - 0.054 |
| procedure volume >=100 # 2013 | 0.047 | 0.000   | 0.040 - 0.055 |
| procedure volume >=100 # 2014 | 0.032 | 0.000   | 0.028 - 0.036 |

**Third step:** A random effects meta regression (using Stata's command metareg) with time and volume as continuous covariates was applied to the estimated rates.

|               | Coeff  | p-value | 95% CI          |
|---------------|--------|---------|-----------------|
| Volume effect | -0.007 | 0.002   | -0.012 - -0.003 |
| Annual change | -0.006 | 0.000   | -0.008 - -0.004 |

**Fourth step:** A second random effects meta regression model was applied including also an interaction term.

|                                | Coeff  | p-value | 95% CI          |
|--------------------------------|--------|---------|-----------------|
| Volume effect                  | -4.536 | 0.026   | -8.473 - -0.600 |
| Annual change                  | -0.011 | 0.000   | -0.016 - -0.006 |
| Annual change of volume effect | 0.002  | 0.027   | 0.000 - 0.004   |

Table S3: Results of the logistic regression model, transformation into discrete event probabilities and subsequent meta regressions

**First step:** Logistic regression model on 43,996 TAVI cases with stroke as dependent variable, an interaction term (n\_ik\_year\_50\_100#year) between categorical time (in years) and volume categories and 22 predefined patient and procedural characteristics as potential confounder.

| n_ik_year_50_100               | OR    | p-value | 95% CI         |
|--------------------------------|-------|---------|----------------|
| procedure volume <50           | 1     |         |                |
| procedure volume 50-99         | 0.929 | 0.886   | 0.339 - 2.5473 |
| procedure volume >=100         | 0.969 | 0.945   | 0.398 - 2.3631 |
| year                           |       |         |                |
| 2008                           | 1     |         |                |
| 2009                           | 1.140 | 0.643   | 0.654 - 1.989  |
| 2010                           | 0.732 | 0.308   | 0.401 - 1.335  |
| 2011                           | 0.678 | 0.211   | 0.369 - 1.246  |
| 2012                           | 0.659 | 0.197   | 0.350 - 1.241  |
| 2013                           | 0.574 | 0.114   | 0.289 - 1.142  |
| 2014                           | 0.759 | 0.426   | 0.385 - 1.496  |
| n_ik_year_50_100#year          |       |         |                |
| procedure volume 50-99 # 2009  | 1.079 | 0.896   | 0.344 - 3.384  |
| procedure volume 50-99 # 2010  | 1.310 | 0.637   | 0.428 - 4.009  |
| procedure volume 50-99 # 2011  | 1.233 | 0.715   | 0.400 - 3.796  |
| procedure volume 50-99 # 2012  | 1.247 | 0.706   | 0.396 - 3.921  |
| procedure volume 50-99 # 2013  | 1.332 | 0.631   | 0.414 - 4.288  |
| procedure volume 50-99 # 2014  | 0.957 | 0.942   | 0.290 - 3.162  |
| procedure volume >=100 # 2009  | 0.779 | 0.649   | 0.265 - 2.287  |
| procedure volume >=100 # 2010  | 1.134 | 0.810   | 0.407 - 3.159  |
| procedure volume >=100 # 2011  | 1.640 | 0.331   | 0.606 - 4.440  |
| procedure volume >=100 # 2012  | 1.209 | 0.712   | 0.441 - 3.312  |
| procedure volume >=100 # 2013  | 1.769 | 0.282   | 0.626 - 4.995  |
| procedure volume >=100 # 2014  | 1.099 | 0.857   | 0.393 - 3.076  |
| Female                         | 0.648 | 0.000   | 0.565 - 0.744  |
| Age in years                   | 0.900 | 0.000   | 0.890 - 0.910  |
| Estimated logistic EuroSCORE   | 68461 | 0.000   | 33804 - 138650 |
| Aortic valve stenosis          | 1.278 | 0.067   | 0.983 - 1.663  |
| Combined aortic valve diseases | 1.329 | 0.045   | 1.006 - 1.755  |
| NYHA II                        | 0.949 | 0.675   | 0.744 - 1.211  |
| NYHA III or IV                 | 1.096 | 0.166   | 0.962 - 1.249  |
| CAD                            | 1.011 | 0.875   | 0.885 - 1.154  |
| Hypertension                   | 0.910 | 0.148   | 0.802 - 1.034  |
| Previous MI (within 4 months)  | 0.278 | 0.000   | 0.167 - 0.464  |
| Previous MI (within 1 year)    | 1.246 | 0.491   | 0.667 - 2.328  |
| Previous MI (after 1 year)     | 1.005 | 0.975   | 0.742 - 1.360  |
| Previous CABG                  | 0.857 | 0.350   | 0.620 - 1.184  |
| Previous cardiac surgery       | 0.120 | 0.000   | 0.089 - 0.161  |
| Peripheral vascular disease    | 0.395 | 0.000   | 0.325 - 0.480  |
| Carotid disease                | 0.461 | 0.000   | 0.362 - 0.587  |
| COPD                           | 0.355 | 0.000   | 0.295 - 0.429  |
| Pulmonary hypertension         | 0.198 | 0.000   | 0.164 - 0.239  |
| GFR <15%                       | 0.266 | 0.000   | 0.183 - 0.387  |
| GFR <30%                       | 0.297 | 0.000   | 0.226 - 0.391  |
| Atrial fibrillation            | 1.093 | 0.165   | 0.964 - 1.239  |
| Diabetes                       | 1.079 | 0.260   | 0.945 - 1.231  |

**Second step:** Predicted probabilities are calculated by setting each confounder to its mean value (prediction at the means) using Stata's margins command with application of the atmeans option.

| n_ik_year_50_100#year         | Prob. | p-value | 95% CI        |
|-------------------------------|-------|---------|---------------|
| procedure volume <50 # 2008   | 0.022 | 0.000   | 0.012 - 0.031 |
| procedure volume <50 # 2009   | 0.025 | 0.000   | 0.017 - 0.032 |
| procedure volume <50 # 2010   | 0.016 | 0.000   | 0.010 - 0.022 |
| procedure volume <50 # 2011   | 0.015 | 0.000   | 0.009 - 0.021 |
| procedure volume <50 # 2012   | 0.014 | 0.000   | 0.008 - 0.021 |
| procedure volume <50 # 2013   | 0.013 | 0.000   | 0.006 - 0.019 |
| procedure volume <50 # 2014   | 0.016 | 0.000   | 0.008 - 0.025 |
| procedure volume 50-99 # 2008 | 0.020 | 0.026   | 0.002 - 0.038 |
| procedure volume 50-99 # 2009 | 0.025 | 0.000   | 0.014 - 0.035 |
| procedure volume 50-99 # 2010 | 0.019 | 0.000   | 0.014 - 0.025 |
| procedure volume 50-99 # 2011 | 0.017 | 0.000   | 0.012 - 0.022 |
| procedure volume 50-99 # 2012 | 0.017 | 0.000   | 0.011 - 0.022 |
| procedure volume 50-99 # 2013 | 0.015 | 0.000   | 0.011 - 0.020 |
| procedure volume 50-99 # 2014 | 0.015 | 0.000   | 0.009 - 0.021 |
| procedure volume >=100 # 2008 | 0.021 | 0.009   | 0.005 - 0.037 |
| procedure volume >=100 # 2009 | 0.019 | 0.000   | 0.009 - 0.028 |
| procedure volume >=100 # 2010 | 0.017 | 0.000   | 0.012 - 0.023 |
| procedure volume >=100 # 2011 | 0.023 | 0.000   | 0.019 - 0.028 |
| procedure volume >=100 # 2012 | 0.017 | 0.000   | 0.014 - 0.020 |
| procedure volume >=100 # 2013 | 0.021 | 0.000   | 0.018 - 0.025 |
| procedure volume >=100 # 2014 | 0.018 | 0.000   | 0.015 - 0.020 |

**Third step:** A random effects meta regression (using Stata's command metareg) with time and volume as continuous covariates was applied to the estimated rates.

|               | Coeff  | p-value | 95% CI         |
|---------------|--------|---------|----------------|
| Volume effect | 0.001  | 0.196   | -0.001 - 0.003 |
| Annual change | -0.001 | 0.029   | -0.002 - 0.000 |

**Fourth step:** A second random effects meta regression model was applied including also an interaction term.

|                                | Coeff  | p-value | 95% CI         |
|--------------------------------|--------|---------|----------------|
| Volume effect                  | -1.103 | 0.307   | -3.311 - 1.106 |
| Annual change                  | -0.002 | 0.086   | -0.005 - 0.000 |
| Annual change of volume effect | 0.001  | 0.306   | -0.001 - 0.002 |

Table S4: Results of the logistic regression model, transformation into discrete event probabilities and subsequent meta regressions

**First step:** Logistic regression model on 43,996 TAVI cases with bleeding as dependent variable, an interaction term (n\_ik\_year\_50\_100#year) between categorical time (in years) and volume categories and 22 predefined patient and procedural characteristics as potential confounder.

| n_ik_year_50_100               | OR    | p-value | 95% CI        |
|--------------------------------|-------|---------|---------------|
| procedure volume <50           | 1     |         |               |
| procedure volume 50-99         | 0.806 | 0.366   | 0.506 - 1.286 |
| procedure volume >=100         | 0.485 | 0.006   | 0.291 - 0.811 |
| year                           |       |         |               |
| 2008                           | 1     |         |               |
| 2009                           | 0.942 | 0.677   | 0.711 - 1.248 |
| 2010                           | 0.775 | 0.086   | 0.579 - 1.037 |
| 2011                           | 0.574 | 0.000   | 0.422 - 0.781 |
| 2012                           | 0.502 | 0.000   | 0.363 - 0.696 |
| 2013                           | 0.559 | 0.001   | 0.399 - 0.785 |
| 2014                           | 0.340 | 0.000   | 0.226 - 0.511 |
| n_ik_year_50_100#year          |       |         |               |
| procedure volume 50-99 # 2009  | 0.992 | 0.978   | 0.571 - 1.724 |
| procedure volume 50-99 # 2010  | 1.176 | 0.541   | 0.699 - 1.980 |
| procedure volume 50-99 # 2011  | 1.224 | 0.458   | 0.718 - 2.087 |
| procedure volume 50-99 # 2012  | 1.321 | 0.321   | 0.762 - 2.293 |
| procedure volume 50-99 # 2013  | 0.894 | 0.693   | 0.511 - 1.563 |
| procedure volume 50-99 # 2014  | 1.265 | 0.463   | 0.675 - 2.374 |
| procedure volume >=100 # 2009  | 1.070 | 0.828   | 0.581 - 1.970 |
| procedure volume >=100 # 2010  | 1.078 | 0.799   | 0.605 - 1.920 |
| procedure volume >=100 # 2011  | 2.198 | 0.006   | 1.249 - 3.866 |
| procedure volume >=100 # 2012  | 1.669 | 0.080   | 0.941 - 2.960 |
| procedure volume >=100 # 2013  | 1.371 | 0.286   | 0.768 - 2.447 |
| procedure volume >=100 # 2014  | 1.540 | 0.174   | 0.827 - 2.868 |
| Female                         | 1.096 | 0.032   | 1.008 - 1.193 |
| Age in years                   | 0.982 | 0.000   | 0.974 - 0.990 |
| Estimated logistic EuroSCORE   | 5.813 | 0.000   | 3.386 - 9.979 |
| Aortic valve stenosis          | 0.738 | 0.000   | 0.639 - 0.852 |
| Combined aortic valve diseases | 0.677 | 0.000   | 0.580 - 0.790 |
| NYHA II                        | 0.665 | 0.000   | 0.562 - 0.786 |
| NYHA III or IV                 | 1.313 | 0.000   | 1.216 - 1.418 |
| CAD                            | 1.062 | 0.137   | 0.981 - 1.149 |
| Hypertension                   | 0.798 | 0.000   | 0.741 - 0.861 |
| Previous MI (within 4 months)  | 0.866 | 0.324   | 0.650 - 1.153 |
| Previous MI (within 1 year)    | 1.071 | 0.742   | 0.711 - 1.614 |
| Previous MI (after 1 year)     | 0.869 | 0.137   | 0.721 - 1.046 |
| Previous CABG                  | 0.530 | 0.000   | 0.447 - 0.629 |
| Previous cardiac surgery       | 1.275 | 0.005   | 1.077 - 1.509 |
| Peripheral vascular disease    | 1.255 | 0.000   | 1.118 - 1.409 |
| Carotid disease                | 1.182 | 0.022   | 1.024 - 1.364 |
| COPD                           | 0.998 | 0.969   | 0.896 - 1.111 |
| Pulmonary hypertension         | 0.833 | 0.002   | 0.741 - 0.935 |
| GFR <15%                       | 2.045 | 0.000   | 1.725 - 2.423 |
| GFR <30%                       | 1.446 | 0.000   | 1.240 - 1.685 |
| Atrial fibrillation            | 1.418 | 0.000   | 1.316 - 1.528 |
| Diabetes                       | 0.968 | 0.418   | 0.894 - 1.048 |

**Second step:** Predicted probabilities are calculated by setting each confounder to its mean value (prediction at the means) using Stata's margins command with application of the atmeans option.

| n_ik_year_50_100#year         | Prob. | p-value | 95% CI        |
|-------------------------------|-------|---------|---------------|
| procedure volume <50 # 2008   | 0.134 | 0.000   | 0.108 - 0.161 |
| procedure volume <50 # 2009   | 0.128 | 0.000   | 0.109 - 0.146 |
| procedure volume <50 # 2010   | 0.107 | 0.000   | 0.090 - 0.125 |
| procedure volume <50 # 2011   | 0.082 | 0.000   | 0.066 - 0.097 |
| procedure volume <50 # 2012   | 0.072 | 0.000   | 0.057 - 0.088 |
| procedure volume <50 # 2013   | 0.080 | 0.000   | 0.062 - 0.098 |
| procedure volume <50 # 2014   | 0.050 | 0.000   | 0.034 - 0.066 |
| procedure volume 50-99 # 2008 | 0.111 | 0.000   | 0.071 - 0.151 |
| procedure volume 50-99 # 2009 | 0.105 | 0.000   | 0.082 - 0.128 |
| procedure volume 50-99 # 2010 | 0.102 | 0.000   | 0.089 - 0.116 |
| procedure volume 50-99 # 2011 | 0.081 | 0.000   | 0.069 - 0.093 |
| procedure volume 50-99 # 2012 | 0.077 | 0.000   | 0.064 - 0.090 |
| procedure volume 50-99 # 2013 | 0.059 | 0.000   | 0.049 - 0.069 |
| procedure volume 50-99 # 2014 | 0.051 | 0.000   | 0.039 - 0.063 |
| procedure volume >=100 # 2008 | 0.070 | 0.000   | 0.040 - 0.100 |
| procedure volume >=100 # 2009 | 0.071 | 0.000   | 0.052 - 0.090 |
| procedure volume >=100 # 2010 | 0.059 | 0.000   | 0.048 - 0.070 |
| procedure volume >=100 # 2011 | 0.087 | 0.000   | 0.078 - 0.096 |
| procedure volume >=100 # 2012 | 0.059 | 0.000   | 0.053 - 0.066 |
| procedure volume >=100 # 2013 | 0.055 | 0.000   | 0.049 - 0.060 |
| procedure volume >=100 # 2014 | 0.038 | 0.000   | 0.034 - 0.042 |

**Third step:** A random effects meta regression (using Stata's command metareg) with time and volume as continuous covariates was applied to the estimated rates.

|               | Coeff  | p-value | 95% CI           |
|---------------|--------|---------|------------------|
| Volume effect | -0.011 | 0.001   | -0.016 - -0.0049 |
| Annual change | -0.011 | 0.000   | -0.013 - -0.0083 |

**Fourth step:** A second random effects meta regression model was applied including also an interaction term.

|                                | Coeff    | p-value | 95% CI           |
|--------------------------------|----------|---------|------------------|
| Volume effect                  | -4.84852 | 0.169   | -11.97 - 2.27482 |
| Annual change                  | -0.01589 | 0.001   | -0.024 - -0.0076 |
| Annual change of volume effect | 0.0024   | 0.170   | -0.001 - 0.00595 |



Table S5: Results of the logistic regression model, transformation into discrete event probabilities and subsequent meta regressions

**First step:** Linear regression model on 43,996 TAVI cases with Length of hospital stay as dependent variable, an interaction term (n\_ik\_year\_50\_100#year) between categorical time (in years) and volume categories and 22 predefined patient and procedural characteristics as potential confounder.

| n_ik_year_50_100               | Coeff  | p-value | 95% CI          |
|--------------------------------|--------|---------|-----------------|
| procedure volume <50           | 0      |         |                 |
| procedure volume 50-99         | 2.959  | 0.001   | 1.133 - 4.786   |
| procedure volume >=100         | -4.148 | 0.000   | -5.574 - -2.721 |
| year                           |        |         |                 |
| 2008                           | 0      |         |                 |
| 2009                           | 2.179  | 0.001   | 0.950 - 3.409   |
| 2010                           | 1.472  | 0.019   | 0.247 - 2.697   |
| 2011                           | 0.507  | 0.422   | -0.731 - 1.745  |
| 2012                           | -1.002 | 0.100   | -2.197 - 0.193  |
| 2013                           | 0.382  | 0.580   | -0.970 - 1.734  |
| 2014                           | -0.060 | 0.931   | -1.433 - 1.312  |
| n_ik_year_50_100#year          |        |         |                 |
| procedure volume 50-99 # 2009  | -5.745 | 0.000   | -7.942 - -3.547 |
| procedure volume 50-99 # 2010  | -4.872 | 0.000   | -6.926 - -2.819 |
| procedure volume 50-99 # 2011  | -3.555 | 0.001   | -5.622 - -1.488 |
| procedure volume 50-99 # 2012  | -2.174 | 0.037   | -4.219 - -0.130 |
| procedure volume 50-99 # 2013  | -4.452 | 0.000   | -6.576 - -2.327 |
| procedure volume 50-99 # 2014  | -3.947 | 0.000   | -6.110 - -1.783 |
| procedure volume >=100 # 2009  | 1.066  | 0.242   | -0.721 - 2.853  |
| procedure volume >=100 # 2010  | 0.788  | 0.365   | -0.915 - 2.490  |
| procedure volume >=100 # 2011  | 1.972  | 0.021   | 0.292 - 3.652   |
| procedure volume >=100 # 2012  | 2.929  | 0.000   | 1.302 - 4.557   |
| procedure volume >=100 # 2013  | 0.970  | 0.275   | -0.773 - 2.713  |
| procedure volume >=100 # 2014  | 0.390  | 0.662   | -1.358 - 2.139  |
| Female                         | -0.483 | 0.000   | -0.725 - -0.241 |
| Age in years                   | -0.247 | 0.000   | -0.276 - -0.218 |
| Estimated logistic EuroSCORE   | 25.503 | 0.000   | 23.345 - 27.661 |
| Aortic valve stenosis          | -6.255 | 0.000   | -6.912 - -5.598 |
| Combined aortic valve diseases | -6.592 | 0.000   | -7.263 - -5.921 |
| NYHA II                        | 0.154  | 0.365   | -0.179 - 0.487  |
| NYHA III or IV                 | 2.597  | 0.000   | 2.374 - 2.821   |
| CAD                            | -0.037 | 0.740   | -0.259 - 0.184  |
| Hypertension                   | -0.888 | 0.000   | -1.111 - -0.666 |
| Previous MI (within 4 months)  | -3.355 | 0.000   | -4.175 - -2.534 |
| Previous MI (within 1 year)    | 0.015  | 0.980   | -1.172 - 1.203  |
| Previous MI (after 1 year)     | -0.303 | 0.250   | -0.819 - 0.213  |
| Previous CABG                  | -2.938 | 0.000   | -3.596 - -2.280 |
| Previous cardiac surgery       | -1.710 | 0.000   | -2.405 - -1.015 |
| Peripheral vascular disease    | -0.917 | 0.000   | -1.345 - -0.489 |
| Carotid disease                | -1.110 | 0.000   | -1.614 - -0.606 |
| COPD                           | -0.618 | 0.001   | -0.973 - -0.263 |
| Pulmonary hypertension         | -2.226 | 0.000   | -2.624 - -1.827 |
| GFR <15%                       | 1.941  | 0.000   | 0.958 - 2.923   |
| GFR <30%                       | 0.725  | 0.034   | 0.054 - 1.396   |
| Atrial fibrillation            | 2.575  | 0.000   | 2.365 - 2.785   |
| Diabetes                       | 0.932  | 0.000   | 0.702 - 1.161   |

**Second step:** Marginal means are calculated by setting each confounder to its mean value (prediction at the means) using Stata's margins command with application of the atmeans option.

| n_ik_year_50_100#year         | Coeff  | p-value | 95% CI         |
|-------------------------------|--------|---------|----------------|
| procedure volume <50 # 2008   | 19.184 | 0.000   | 18.241 - 20.13 |
| procedure volume <50 # 2009   | 21.364 | 0.000   | 20.577 - 22.15 |
| procedure volume <50 # 2010   | 20.656 | 0.000   | 19.874 - 21.44 |
| procedure volume <50 # 2011   | 19.691 | 0.000   | 18.890 - 20.49 |
| procedure volume <50 # 2012   | 18.182 | 0.000   | 17.448 - 18.92 |
| procedure volume <50 # 2013   | 19.566 | 0.000   | 18.599 - 20.53 |
| procedure volume <50 # 2014   | 19.124 | 0.000   | 18.128 - 20.12 |
| procedure volume 50-99 # 2008 | 22.144 | 0.000   | 20.579 - 23.71 |
| procedure volume 50-99 # 2009 | 18.578 | 0.000   | 17.650 - 19.51 |
| procedure volume 50-99 # 2010 | 18.743 | 0.000   | 18.221 - 19.27 |
| procedure volume 50-99 # 2011 | 19.095 | 0.000   | 18.554 - 19.64 |
| procedure volume 50-99 # 2012 | 18.967 | 0.000   | 18.413 - 19.52 |
| procedure volume 50-99 # 2013 | 18.074 | 0.000   | 17.576 - 18.57 |
| procedure volume 50-99 # 2014 | 18.137 | 0.000   | 17.545 - 18.73 |
| procedure volume >=100 # 2008 | 15.036 | 0.000   | 13.964 - 16.11 |
| procedure volume >=100 # 2009 | 18.281 | 0.000   | 17.543 - 19.02 |
| procedure volume >=100 # 2010 | 17.296 | 0.000   | 16.791 - 17.8  |
| procedure volume >=100 # 2011 | 17.515 | 0.000   | 17.137 - 17.89 |
| procedure volume >=100 # 2012 | 16.964 | 0.000   | 16.696 - 17.23 |
| procedure volume >=100 # 2013 | 16.389 | 0.000   | 16.136 - 16.64 |
| procedure volume >=100 # 2014 | 15.366 | 0.000   | 15.179 - 15.55 |

**Third step:** A random effects meta regression (using Stata's command metareg) with time and volume as continuous covariates was applied to the estimated means.

|               | Coeff  | p-value | 95% CI           |
|---------------|--------|---------|------------------|
| Volume effect | -1.488 | 0.000   | -2.021 - -0.9555 |
| Annual change | -0.269 | 0.029   | -0.507 - -0.0307 |

**Fourth step:** A second random effects meta regression model was applied including also an interaction term.

|                                | Coeff    | p-value | 95% CI           |
|--------------------------------|----------|---------|------------------|
| Volume effect                  | 22.5075  | 0.935   | -554.1 - 599.146 |
| Annual change                  | -0.23991 | 0.452   | -0.898 - 0.41837 |
| Annual change of volume effect | -0.01193 | 0.931   | -0.299 - 0.2748  |

Table S6: Results of the logistic regression model, transformation into discrete event probabilities and subsequent meta regressions

**First step:** Linear regression model on 43,996 TAVI cases with reimbursement as dependent variable, an interaction term (n\_ik\_year\_50\_100#year) between categorical time (in years) and volume categories and 22 predefined patient and procedural characteristics as potential confounder.

| n_ik_year_50_100               | Coeff   | p-value | 95% CI            |
|--------------------------------|---------|---------|-------------------|
| procedure volume <50           | 0       |         |                   |
| procedure volume 50-99         | -905.1  | 0.024   | -1689.5 - -120.7  |
| procedure volume >=100         | -1792.9 | 0.000   | -2614.4 - -971.4  |
| year                           |         |         |                   |
| 2010                           | 0       |         |                   |
| 2011                           | -1104.3 | 0.026   | -2078.5 - -130.1  |
| 2012                           | -1872.9 | 0.000   | -2810.5 - -935.4  |
| 2013                           | -1339.7 | 0.007   | -2316.5 - -362.9  |
| 2014                           | -1240.5 | 0.015   | -2235.4 - -245.5  |
| n_ik_year_50_100#year          |         |         |                   |
| procedure volume 50-99 # 2011  | 349.5   | 0.545   | -783.6 - 1482.5   |
| procedure volume 50-99 # 2012  | 598.9   | 0.269   | -464.0 - 1661.8   |
| procedure volume 50-99 # 2013  | -162.6  | 0.775   | -1276.2 - 950.9   |
| procedure volume 50-99 # 2014  | -51.3   | 0.928   | -1159.3 - 1056.7  |
| procedure volume >=100 # 2011  | 994.4   | 0.082   | -127.8 - 2116.7   |
| procedure volume >=100 # 2012  | 994.3   | 0.063   | -55.5 - 2044.2    |
| procedure volume >=100 # 2013  | 614.5   | 0.267   | -471.3 - 1700.4   |
| procedure volume >=100 # 2014  | 803.0   | 0.150   | -289.3 - 1895.4   |
| Female                         | -816.4  | 0.000   | -1022.5 - -610.4  |
| Age in years                   | -134.0  | 0.000   | -159.5 - -108.6   |
| Estimated logistic EuroSCORE   | 9498.4  | 0.000   | 7514.7 - 11482.1  |
| Aortic valve stenosis          | -1480.8 | 0.000   | -2097.4 - -864.3  |
| Combined aortic valve diseases | -1671.1 | 0.000   | -2296.6 - -1045.6 |
| NYHA II                        | -420.2  | 0.001   | -665.2 - -175.3   |
| NYHA III or IV                 | 686.8   | 0.000   | 501.3 - 872.2     |
| CAD                            | 133.6   | 0.153   | -49.7 - 316.8     |
| Hypertension                   | -427.8  | 0.000   | -614.4 - -241.3   |
| Previous MI (within 4 months)  | -1677.0 | 0.000   | -2134.6 - -1219.4 |
| Previous MI (within 1 year)    | 295.6   | 0.574   | -733.9 - 1325.2   |
| Previous MI (after 1 year)     | -483.1  | 0.009   | -843.2 - -123.0   |
| Previous CABG                  | -1118.8 | 0.000   | -1687.9 - -549.8  |
| Previous cardiac surgery       | -574.4  | 0.061   | -1174.8 - 25.9    |
| Peripheral vascular disease    | 86.9    | 0.649   | -287.8 - 461.7    |
| Carotid disease                | -365.0  | 0.106   | -807.3 - 77.3     |
| COPD                           | -0.6    | 0.997   | -318.6 - 317.4    |
| Pulmonary hypertension         | -951.6  | 0.000   | -1302.7 - -600.4  |
| GFR <15%                       | 1849.2  | 0.000   | 921.0 - 2777.4    |
| GFR <30%                       | 322.0   | 0.258   | -235.7 - 879.6    |
| Atrial fibrillation            | 913.0   | 0.000   | 741.8 - 1084.1    |
| Diabetes                       | 223.8   | 0.020   | 34.7 - 412.9      |

**Second step:** Marginal means are calculated by setting each confounder to its mean value (prediction at the means) using Stata's margins command with application of the atmeans option.

| n_ik_year_50_100#year         | Coeff   | p-value | 95% CI            |
|-------------------------------|---------|---------|-------------------|
| procedure volume <50 # 2010   | 36999.8 | 0.000   | 36302.5 - 37697.1 |
| procedure volume <50 # 2011   | 35895.5 | 0.000   | 35214.3 - 36576.7 |
| procedure volume <50 # 2012   | 35126.9 | 0.000   | 34499.5 - 35754.2 |
| procedure volume <50 # 2013   | 35660.1 | 0.000   | 34979.4 - 36340.7 |
| procedure volume <50 # 2014   | 35759.3 | 0.000   | 35049.7 - 36469.0 |
| procedure volume 50-99 # 2010 | 36094.7 | 0.000   | 35738.1 - 36451.3 |
| procedure volume 50-99 # 2011 | 35339.9 | 0.000   | 34882.3 - 35797.5 |
| procedure volume 50-99 # 2012 | 34820.7 | 0.000   | 34470.7 - 35170.6 |
| procedure volume 50-99 # 2013 | 34592.3 | 0.000   | 34198.2 - 34986.4 |
| procedure volume 50-99 # 2014 | 34803.0 | 0.000   | 34459.0 - 35147.0 |
| procedure volume >=100 # 2010 | 35206.9 | 0.000   | 34775.2 - 35638.7 |
| procedure volume >=100 # 2011 | 35097.1 | 0.000   | 34744.3 - 35449.8 |
| procedure volume >=100 # 2012 | 34328.3 | 0.000   | 34128.7 - 34527.9 |
| procedure volume >=100 # 2013 | 34481.7 | 0.000   | 34285.1 - 34678.4 |
| procedure volume >=100 # 2014 | 34769.5 | 0.000   | 34623.4 - 34915.6 |

**Third step:** A random effects meta regression (using Stata's command metareg) with time and volume as continuous covariates was applied to the estimated means.

|               | Coeff  | p-value | 95% CI          |
|---------------|--------|---------|-----------------|
| Volume effect | -503.8 | 0.005   | -826.4 - -181.2 |
| Annual change | -257.6 | 0.011   | -444.3 - -70.9  |

**Fourth step:** A second random effects meta regression model was applied including also an interaction term.

|                                | Coeff     | p-value | 95% CI               |
|--------------------------------|-----------|---------|----------------------|
| Volume effect                  | -245427.3 | 0.262   | -702076.0 - 211221.4 |
| Annual change                  | -518.0    | 0.050   | -1036.3 - 0.2        |
| Annual change of volume effect | 121.7     | 0.263   | -105.2 - 348.7       |

Table S7: Results of the logistic regression model, transformation into discrete event probabilities and subsequent meta regressions

**First step:** Logistic regression model on 43,996 TAVI cases with ventilation as dependent variable, an interaction term (n\_ik\_year\_50\_100#year) between categorical time (in years) and volume categories and 22 predefined patient and procedural characteristics as potential confounder.

| n_ik_year_50_100               | OR    | p-value | 95% CI         |
|--------------------------------|-------|---------|----------------|
| procedure volume <50           | 1     |         |                |
| procedure volume 50-99         | 0.716 | 0.262   | 0.400 - 1.283  |
| procedure volume >=100         | 0.492 | 0.026   | 0.263 - 0.918  |
| year                           |       |         |                |
| 2008                           | 1     |         |                |
| 2009                           | 0.946 | 0.745   | 0.677 - 1.322  |
| 2010                           | 0.853 | 0.362   | 0.605 - 1.201  |
| 2011                           | 0.765 | 0.135   | 0.539 - 1.086  |
| 2012                           | 0.664 | 0.029   | 0.459 - 0.959  |
| 2013                           | 0.623 | 0.018   | 0.420 - 0.923  |
| 2014                           | 0.532 | 0.004   | 0.345 - 0.819  |
| n_ik_year_50_100#year          |       |         |                |
| procedure volume 50-99 # 2009  | 1.079 | 0.827   | 0.544 - 2.141  |
| procedure volume 50-99 # 2010  | 1.382 | 0.322   | 0.729 - 2.622  |
| procedure volume 50-99 # 2011  | 1.43  | 0.277   | 0.751 - 2.723  |
| procedure volume 50-99 # 2012  | 1.096 | 0.789   | 0.561 - 2.142  |
| procedure volume 50-99 # 2013  | 0.929 | 0.833   | 0.469 - 1.841  |
| procedure volume 50-99 # 2014  | 1.016 | 0.967   | 0.489 - 2.111  |
| procedure volume >=100 # 2009  | 1.732 | 0.131   | 0.848 - 3.537  |
| procedure volume >=100 # 2010  | 1.232 | 0.555   | 0.616 - 2.462  |
| procedure volume >=100 # 2011  | 1.914 | 0.059   | 0.975 - 3.758  |
| procedure volume >=100 # 2012  | 1.624 | 0.163   | 0.822 - 3.210  |
| procedure volume >=100 # 2013  | 1.636 | 0.165   | 0.817 - 3.277  |
| procedure volume >=100 # 2014  | 1.358 | 0.402   | 0.664 - 2.776  |
| Female                         | 0.713 | 0.000   | 0.651 - 0.781  |
| Age in years                   | 0.959 | 0.000   | 0.951 - 0.968  |
| Estimated logistic EuroSCORE   | 13.81 | 0.000   | 7.797 - 24.464 |
| Aortic valve stenosis          | 0.722 | 0.000   | 0.618 - 0.843  |
| Combined aortic valve diseases | 0.663 | 0.000   | 0.561 - 0.783  |
| NYHA II                        | 0.498 | 0.000   | 0.404 - 0.614  |
| NYHA III or IV                 | 1.485 | 0.000   | 1.364 - 1.617  |
| CAD                            | 1.094 | 0.044   | 1.002 - 1.193  |
| Hypertension                   | 0.697 | 0.000   | 0.642 - 0.757  |
| Previous MI (within 4 months)  | 0.804 | 0.163   | 0.591 - 1.093  |
| Previous MI (within 1 year)    | 0.796 | 0.358   | 0.490 - 1.294  |
| Previous MI (after 1 year)     | 0.897 | 0.268   | 0.740 - 1.087  |
| Previous CABG                  | 0.675 | 0.000   | 0.557 - 0.816  |
| Previous cardiac surgery       | 0.848 | 0.091   | 0.701 - 1.026  |
| Peripheral vascular disease    | 1.198 | 0.004   | 1.060 - 1.353  |
| Carotid disease                | 0.855 | 0.061   | 0.725 - 1.007  |
| COPD                           | 1.211 | 0.001   | 1.085 - 1.351  |
| Pulmonary hypertension         | 0.758 | 0.000   | 0.669 - 0.858  |
| GFR <15%                       | 1.364 | 0.001   | 1.129 - 1.647  |
| GFR <30%                       | 1.252 | 0.008   | 1.059 - 1.479  |
| Atrial fibrillation            | 1.553 | 0.000   | 1.430 - 1.687  |
| Diabetes                       | 1.138 | 0.003   | 1.045 - 1.239  |

**Second step:** Predicted probabilities are calculated by setting each confounder to its mean value (prediction at the means) using Stata's margins command with application of the atmeans option.

| n_ik_year_50_100#year         | Prob. | p-value | 95% CI        |
|-------------------------------|-------|---------|---------------|
| procedure volume <50 # 2008   | 0.086 | 0.000   | 0.065 - 0.107 |
| procedure volume <50 # 2009   | 0.082 | 0.000   | 0.067 - 0.096 |
| procedure volume <50 # 2010   | 0.074 | 0.000   | 0.060 - 0.089 |
| procedure volume <50 # 2011   | 0.067 | 0.000   | 0.053 - 0.081 |
| procedure volume <50 # 2012   | 0.059 | 0.000   | 0.045 - 0.073 |
| procedure volume <50 # 2013   | 0.055 | 0.000   | 0.040 - 0.070 |
| procedure volume <50 # 2014   | 0.048 | 0.000   | 0.032 - 0.063 |
| procedure volume 50-99 # 2008 | 0.063 | 0.000   | 0.033 - 0.094 |
| procedure volume 50-99 # 2009 | 0.064 | 0.000   | 0.046 - 0.083 |
| procedure volume 50-99 # 2010 | 0.074 | 0.000   | 0.062 - 0.085 |
| procedure volume 50-99 # 2011 | 0.069 | 0.000   | 0.058 - 0.079 |
| procedure volume 50-99 # 2012 | 0.047 | 0.000   | 0.037 - 0.057 |
| procedure volume 50-99 # 2013 | 0.038 | 0.000   | 0.030 - 0.045 |
| procedure volume 50-99 # 2014 | 0.035 | 0.000   | 0.025 - 0.045 |
| procedure volume >=100 # 2008 | 0.044 | 0.000   | 0.020 - 0.068 |
| procedure volume >=100 # 2009 | 0.070 | 0.000   | 0.052 - 0.089 |
| procedure volume >=100 # 2010 | 0.046 | 0.000   | 0.037 - 0.056 |
| procedure volume >=100 # 2011 | 0.063 | 0.000   | 0.056 - 0.071 |
| procedure volume >=100 # 2012 | 0.047 | 0.000   | 0.042 - 0.053 |
| procedure volume >=100 # 2013 | 0.045 | 0.000   | 0.040 - 0.050 |
| procedure volume >=100 # 2014 | 0.032 | 0.000   | 0.029 - 0.036 |

**Third step:** A random effects meta regression (using Stata's command metareg) with time and volume as continuous covariates was applied to the estimated rates.

|               | Coeff  | p-value | 95% CI          |
|---------------|--------|---------|-----------------|
| Volume effect | -0.010 | 0.004   | -0.016 - -0.004 |
| Annual change | -0.004 | 0.002   | -0.007 - -0.002 |

**Fourth step:** A second random effects meta regression model was applied including also an interaction term.

|                                | Coeff  | p-value | 95% CI           |
|--------------------------------|--------|---------|------------------|
| Volume effect                  | -6.084 | 0.040   | -11.870 - -0.299 |
| Annual change                  | -0.011 | 0.004   | -0.018 - -0.004  |
| Annual change of volume effect | 0.003  | 0.041   | 0.000 - 0.006    |

**The RECORD statement – checklist of items, extended from the STROBE statement, that should be reported in observational studies using routinely collected health data.**

|                           | Item No. | STROBE items                                                                                                                                                                               | Location in manuscript where items are reported | RECORD items                                                                                                                                                                                                                                                                                                                                                                                                                                | Location in manuscript where items are reported |
|---------------------------|----------|--------------------------------------------------------------------------------------------------------------------------------------------------------------------------------------------|-------------------------------------------------|---------------------------------------------------------------------------------------------------------------------------------------------------------------------------------------------------------------------------------------------------------------------------------------------------------------------------------------------------------------------------------------------------------------------------------------------|-------------------------------------------------|
| <b>Title and abstract</b> |          |                                                                                                                                                                                            |                                                 |                                                                                                                                                                                                                                                                                                                                                                                                                                             |                                                 |
|                           | 1        | (a) Indicate the study's design with a commonly used term in the title or the abstract (b) Provide in the abstract an informative and balanced summary of what was done and what was found | p1-2                                            | RECORD 1.1: The type of data used should be specified in the title or abstract. When possible, the name of the databases used should be included.<br><br>RECORD 1.2: If applicable, the geographic region and timeframe within which the study took place should be reported in the title or abstract.<br><br>RECORD 1.3: If linkage between databases was conducted for the study, this should be clearly stated in the title or abstract. | R(ecord)1.1: p1<br>R1.2: p1-2<br>R1.3: n/a      |
| <b>Introduction</b>       |          |                                                                                                                                                                                            |                                                 |                                                                                                                                                                                                                                                                                                                                                                                                                                             |                                                 |
| Background rationale      | 2        | Explain the scientific background and rationale for the investigation being reported                                                                                                       | p5                                              |                                                                                                                                                                                                                                                                                                                                                                                                                                             |                                                 |
| Objectives                | 3        | State specific objectives, including any prespecified hypotheses                                                                                                                           | p5                                              |                                                                                                                                                                                                                                                                                                                                                                                                                                             |                                                 |
| <b>Methods</b>            |          |                                                                                                                                                                                            |                                                 |                                                                                                                                                                                                                                                                                                                                                                                                                                             |                                                 |
| Study Design              | 4        | Present key elements of study design early in the paper                                                                                                                                    | p6-9                                            |                                                                                                                                                                                                                                                                                                                                                                                                                                             |                                                 |
| Setting                   | 5        | Describe the setting, locations, and relevant dates, including periods of recruitment, exposure, follow-up, and data collection                                                            | p6                                              |                                                                                                                                                                                                                                                                                                                                                                                                                                             |                                                 |
| Participants              | 6        | (a) <i>Cohort study</i> - Give the eligibility criteria, and the                                                                                                                           | p6                                              | RECORD 6.1: The methods of study population selection (such as codes or                                                                                                                                                                                                                                                                                                                                                                     | R6.1: p6<br>R6.2, 6.3: n/a                      |

|                              |    |                                                                                                                                                                                                                                                                                                                                                                                                                                                                                                                                                                                                                                                             |                            |                                                                                                                                                                                                                                                                                                                                                                                                                                                                                                                                                                                                                              |      |
|------------------------------|----|-------------------------------------------------------------------------------------------------------------------------------------------------------------------------------------------------------------------------------------------------------------------------------------------------------------------------------------------------------------------------------------------------------------------------------------------------------------------------------------------------------------------------------------------------------------------------------------------------------------------------------------------------------------|----------------------------|------------------------------------------------------------------------------------------------------------------------------------------------------------------------------------------------------------------------------------------------------------------------------------------------------------------------------------------------------------------------------------------------------------------------------------------------------------------------------------------------------------------------------------------------------------------------------------------------------------------------------|------|
|                              |    | <p>sources and methods of selection of participants. Describe methods of follow-up</p> <p><i>Case-control study</i> - Give the eligibility criteria, and the sources and methods of case ascertainment and control selection. Give the rationale for the choice of cases and controls</p> <p><i>Cross-sectional study</i> - Give the eligibility criteria, and the sources and methods of selection of participants</p> <p><i>(b) Cohort study</i> - For matched studies, give matching criteria and number of exposed and unexposed</p> <p><i>Case-control study</i> - For matched studies, give matching criteria and the number of controls per case</p> |                            | <p>algorithms used to identify subjects) should be listed in detail. If this is not possible, an explanation should be provided.</p> <p>RECORD 6.2: Any validation studies of the codes or algorithms used to select the population should be referenced. If validation was conducted for this study and not published elsewhere, detailed methods and results should be provided.</p> <p>RECORD 6.3: If the study involved linkage of databases, consider use of a flow diagram or other graphical display to demonstrate the data linkage process, including the number of individuals with linked data at each stage.</p> |      |
| Variables                    | 7  | Clearly define all outcomes, exposures, predictors, potential confounders, and effect modifiers. Give diagnostic criteria, if applicable.                                                                                                                                                                                                                                                                                                                                                                                                                                                                                                                   | p6-7                       | RECORD 7.1: A complete list of codes and algorithms used to classify exposures, outcomes, confounders, and effect modifiers should be provided. If these cannot be reported, an explanation should be provided.                                                                                                                                                                                                                                                                                                                                                                                                              | p6-7 |
| Data sources/<br>measurement | 8  | For each variable of interest, give sources of data and details of methods of assessment (measurement). Describe comparability of assessment methods if there is more than one group                                                                                                                                                                                                                                                                                                                                                                                                                                                                        | p6-7, Supplementary tables |                                                                                                                                                                                                                                                                                                                                                                                                                                                                                                                                                                                                                              |      |
| Bias                         | 9  | Describe any efforts to address potential sources of bias                                                                                                                                                                                                                                                                                                                                                                                                                                                                                                                                                                                                   | p6-7, 9                    |                                                                                                                                                                                                                                                                                                                                                                                                                                                                                                                                                                                                                              |      |
| Study size                   | 10 | Explain how the study size was                                                                                                                                                                                                                                                                                                                                                                                                                                                                                                                                                                                                                              | n/a (national cohort)      |                                                                                                                                                                                                                                                                                                                                                                                                                                                                                                                                                                                                                              |      |

|                                                                                                                                           |                                  |            |                                                                                                                                                                                                                                                                                                                                                                                                                                                                                                                                                                      |       |                                                                                                                                                                                                                                                              |
|-------------------------------------------------------------------------------------------------------------------------------------------|----------------------------------|------------|----------------------------------------------------------------------------------------------------------------------------------------------------------------------------------------------------------------------------------------------------------------------------------------------------------------------------------------------------------------------------------------------------------------------------------------------------------------------------------------------------------------------------------------------------------------------|-------|--------------------------------------------------------------------------------------------------------------------------------------------------------------------------------------------------------------------------------------------------------------|
|                                                                                                                                           |                                  | arrived at | (p6-7)                                                                                                                                                                                                                                                                                                                                                                                                                                                                                                                                                               |       |                                                                                                                                                                                                                                                              |
| 1<br>2<br>3<br>4<br>5<br>6                                                                                                                | Quantitative variables           | 11         | Explain how quantitative variables were handled in the analyses. If applicable, describe which groupings were chosen, and why                                                                                                                                                                                                                                                                                                                                                                                                                                        | p7-10 |                                                                                                                                                                                                                                                              |
| 7<br>8<br>9<br>10<br>11<br>12<br>13<br>14<br>15<br>16<br>17<br>18<br>19<br>20<br>21<br>22<br>23<br>24<br>25<br>26<br>27<br>28<br>29<br>30 | Statistical methods              | 12         | (a) Describe all statistical methods, including those used to control for confounding<br>(b) Describe any methods used to examine subgroups and interactions<br>(c) Explain how missing data were addressed<br>(d) <i>Cohort study</i> - If applicable, explain how loss to follow-up was addressed<br><i>Case-control study</i> - If applicable, explain how matching of cases and controls was addressed<br><i>Cross-sectional study</i> - If applicable, describe analytical methods taking account of sampling strategy<br>(e) Describe any sensitivity analyses | p7-10 |                                                                                                                                                                                                                                                              |
| 31<br>32<br>33<br>34<br>35<br>36<br>37<br>38<br>39<br>40<br>41                                                                            | Data access and cleaning methods |            | ..                                                                                                                                                                                                                                                                                                                                                                                                                                                                                                                                                                   |       | RECORD 12.1: Authors should describe the extent to which the investigators had access to the database population used to create the study population.<br><br>RECORD 12.2: Authors should provide information on the data cleaning methods used in the study. |
| 42<br>43<br>44                                                                                                                            | Linkage                          |            | ..                                                                                                                                                                                                                                                                                                                                                                                                                                                                                                                                                                   |       | RECORD 12.3: State whether the study included person-level, institutional-                                                                                                                                                                                   |

|                  |    |                                                                                                                                                                                                                                                                                                                                                 |                                                          |                                                                                                                                                                                                                                                                                                                    |                                                          |
|------------------|----|-------------------------------------------------------------------------------------------------------------------------------------------------------------------------------------------------------------------------------------------------------------------------------------------------------------------------------------------------|----------------------------------------------------------|--------------------------------------------------------------------------------------------------------------------------------------------------------------------------------------------------------------------------------------------------------------------------------------------------------------------|----------------------------------------------------------|
|                  |    |                                                                                                                                                                                                                                                                                                                                                 |                                                          | level, or other data linkage across two or more databases. The methods of linkage and methods of linkage quality evaluation should be provided.                                                                                                                                                                    |                                                          |
| <b>Results</b>   |    |                                                                                                                                                                                                                                                                                                                                                 |                                                          |                                                                                                                                                                                                                                                                                                                    |                                                          |
| Participants     | 13 | (a) Report the numbers of individuals at each stage of the study ( <i>e.g.</i> , numbers potentially eligible, examined for eligibility, confirmed eligible, included in the study, completing follow-up, and analysed)<br>(b) Give reasons for non-participation at each stage.<br>(c) Consider use of a flow diagram                          | n/a (national cohort, administrative data, no follow-up) | RECORD 13.1: Describe in detail the selection of the persons included in the study ( <i>i.e.</i> , study population selection) including filtering based on data quality, data availability and linkage. The selection of included persons can be described in the text and/or by means of the study flow diagram. | n/a (national cohort, administrative data, no follow-up) |
| Descriptive data | 14 | (a) Give characteristics of study participants ( <i>e.g.</i> , demographic, clinical, social) and information on exposures and potential confounders<br>(b) Indicate the number of participants with missing data for each variable of interest<br>(c) <i>Cohort study</i> - summarise follow-up time ( <i>e.g.</i> , average and total amount) | p8                                                       |                                                                                                                                                                                                                                                                                                                    |                                                          |
| Outcome data     | 15 | <i>Cohort study</i> - Report numbers of outcome events or summary measures over time<br><i>Case-control study</i> - Report numbers in each exposure category, or summary measures of exposure<br><i>Cross-sectional study</i> - Report numbers of outcome events or summary measures                                                            | p13                                                      |                                                                                                                                                                                                                                                                                                                    |                                                          |
| Main results     | 16 | (a) Give unadjusted estimates                                                                                                                                                                                                                                                                                                                   | p10-14                                                   |                                                                                                                                                                                                                                                                                                                    |                                                          |

1  
2  
3  
4  
5  
6  
7  
8  
9  
10  
11  
12  
13  
14  
15  
16  
17  
18  
19  
20  
21  
22  
23  
24  
25  
26  
27  
28  
29  
30  
31  
32  
33  
34  
35  
36  
37  
38  
39  
40  
41  
42  
43  
44  
45  
46  
47

|                   |    |                                                                                                                                                                                                                                                                                                                                                                                   |           |                                                                                                                                                                                                                                                                                                          |          |
|-------------------|----|-----------------------------------------------------------------------------------------------------------------------------------------------------------------------------------------------------------------------------------------------------------------------------------------------------------------------------------------------------------------------------------|-----------|----------------------------------------------------------------------------------------------------------------------------------------------------------------------------------------------------------------------------------------------------------------------------------------------------------|----------|
|                   |    | and, if applicable, confounder-adjusted estimates and their precision (e.g., 95% confidence interval). Make clear which confounders were adjusted for and why they were included<br>(b) Report category boundaries when continuous variables were categorized<br>(c) If relevant, consider translating estimates of relative risk into absolute risk for a meaningful time period |           |                                                                                                                                                                                                                                                                                                          |          |
| Other analyses    | 17 | Report other analyses done—e.g., analyses of subgroups and interactions, and sensitivity analyses                                                                                                                                                                                                                                                                                 | n/a       |                                                                                                                                                                                                                                                                                                          |          |
| <b>Discussion</b> |    |                                                                                                                                                                                                                                                                                                                                                                                   |           |                                                                                                                                                                                                                                                                                                          |          |
| Key results       | 18 | Summarise key results with reference to study objectives                                                                                                                                                                                                                                                                                                                          | p14-15    |                                                                                                                                                                                                                                                                                                          |          |
| Limitations       | 19 | Discuss limitations of the study, taking into account sources of potential bias or imprecision. Discuss both direction and magnitude of any potential bias                                                                                                                                                                                                                        | p3, 9-10  | RECORD 19.1: Discuss the implications of using data that were not created or collected to answer the specific research question(s). Include discussion of misclassification bias, unmeasured confounding, missing data, and changing eligibility over time, as they pertain to the study being reported. | p3, 9-10 |
| Interpretation    | 20 | Give a cautious overall interpretation of results considering objectives, limitations, multiplicity of analyses, results from similar studies, and other relevant evidence                                                                                                                                                                                                        | p 14-17   |                                                                                                                                                                                                                                                                                                          |          |
| Generalisability  | 21 | Discuss the generalisability (external validity) of the study results                                                                                                                                                                                                                                                                                                             | p3, 14-17 |                                                                                                                                                                                                                                                                                                          |          |



| Other Information                                         |    |                                                                                                                                                               |    |                                                                                                                                                          |                                                                      |
|-----------------------------------------------------------|----|---------------------------------------------------------------------------------------------------------------------------------------------------------------|----|----------------------------------------------------------------------------------------------------------------------------------------------------------|----------------------------------------------------------------------|
| Funding                                                   | 22 | Give the source of funding and the role of the funders for the present study and, if applicable, for the original study on which the present article is based | p4 |                                                                                                                                                          |                                                                      |
| Accessibility of protocol, raw data, and programming code |    | ..                                                                                                                                                            |    | RECORD 22.1: Authors should provide information on how to access any supplemental information such as the study protocol, raw data, or programming code. | Access to public dataset: p6<br>Further data:<br>Supplemental tables |

\*Reference: Benchimol EI, Smeeth L, Guttman A, Harron K, Moher D, Petersen I, Sørensen HT, von Elm E, Langan SM, the RECORD Working Committee. The REporting of studies Conducted using Observational Routinely-collected health Data (RECORD) Statement. *PLoS Medicine* 2015; in press.

\*Checklist is protected under Creative Commons Attribution ([CC BY](https://creativecommons.org/licenses/by/4.0/)) license.

# BMJ Open

## Volume-outcome relationship in transcatheter aortic valve implantations in Germany 2008-2014: A secondary data analysis of electronic health records

|                                 |                                                                                                                                                                                                                                                                                                                                                                                                                                                                                                                                                                                                                                                                                                                                                                                                                                                                                                                                                                                                                                                                  |
|---------------------------------|------------------------------------------------------------------------------------------------------------------------------------------------------------------------------------------------------------------------------------------------------------------------------------------------------------------------------------------------------------------------------------------------------------------------------------------------------------------------------------------------------------------------------------------------------------------------------------------------------------------------------------------------------------------------------------------------------------------------------------------------------------------------------------------------------------------------------------------------------------------------------------------------------------------------------------------------------------------------------------------------------------------------------------------------------------------|
| Journal:                        | <i>BMJ Open</i>                                                                                                                                                                                                                                                                                                                                                                                                                                                                                                                                                                                                                                                                                                                                                                                                                                                                                                                                                                                                                                                  |
| Manuscript ID                   | bmjopen-2017-020204.R2                                                                                                                                                                                                                                                                                                                                                                                                                                                                                                                                                                                                                                                                                                                                                                                                                                                                                                                                                                                                                                           |
| Article Type:                   | Research                                                                                                                                                                                                                                                                                                                                                                                                                                                                                                                                                                                                                                                                                                                                                                                                                                                                                                                                                                                                                                                         |
| Date Submitted by the Author:   | 04-Jun-2018                                                                                                                                                                                                                                                                                                                                                                                                                                                                                                                                                                                                                                                                                                                                                                                                                                                                                                                                                                                                                                                      |
| Complete List of Authors:       | Kaier, Klaus; Medical Center-University of Freiburg, Institute for Medical Biometry and Statistics<br>Oettinger, Vera; Heart Center Freiburg University, Department of Cardiology and Angiology I<br>Reinecke, H; University of Muenster, Department of Cardiology and Angiology, Adult Congenital and Valvular Heart Disease Center Muenster<br>Schmoor, Claudia; Medical Centre, University of Freiburg<br>Frankenstein, L.; University of Heidelberg, Dpt. of Cardiology, Angiology, Pulmology<br>Vach, Werner; Institute of Medical Biometry and Medical Informatics, Hehn, Philip; Faculty of Medicine and Medical Center – University of Freiburg<br>von zur Mühlen, Constantin; Heart Center Freiburg University, Department of Cardiology and Angiology I<br>Bode, Christoph; Heart Center Freiburg University, Department of Cardiology and Angiology I<br>Zehender, Manfred; Heart Center Freiburg University, Department of Cardiology and Angiology I<br>Reinöhl, Jochen; Heart Center Freiburg University, Department of Cardiology and Angiology I |
| <b>Primary Subject Heading</b>: | Cardiovascular medicine                                                                                                                                                                                                                                                                                                                                                                                                                                                                                                                                                                                                                                                                                                                                                                                                                                                                                                                                                                                                                                          |
| Secondary Subject Heading:      | Health economics                                                                                                                                                                                                                                                                                                                                                                                                                                                                                                                                                                                                                                                                                                                                                                                                                                                                                                                                                                                                                                                 |
| Keywords:                       | Valvular heart disease < CARDIOLOGY, HEALTH ECONOMICS, CARDIOLOGY, Adult cardiology < CARDIOLOGY                                                                                                                                                                                                                                                                                                                                                                                                                                                                                                                                                                                                                                                                                                                                                                                                                                                                                                                                                                 |
|                                 |                                                                                                                                                                                                                                                                                                                                                                                                                                                                                                                                                                                                                                                                                                                                                                                                                                                                                                                                                                                                                                                                  |

SCHOLARONE™  
Manuscripts

# Volume-outcome relationship in transcatheter aortic valve implantations in Germany 2008-2014: A secondary data analysis of electronic health records

Klaus Kaier, PhD<sup>1,2</sup>; Vera Oettinger<sup>2</sup>; Holger Reinecke, MD<sup>3</sup>; Claudia Schmoor, PhD<sup>4</sup>; Lutz Frankenstein, MD<sup>5</sup>; Werner Vach, PhD<sup>1,6</sup>; Philip Hehn<sup>1</sup>; Constantin von zur Mühlen, MD<sup>2</sup>; Christoph Bode, MD<sup>2</sup>; Manfred Zehender, MD, PhD<sup>2</sup>; Jochen Reinöhl, MD<sup>2</sup>

<sup>1</sup> Institute of Medical Biometry and Statistics, Faculty of Medicine and Medical Center – University of Freiburg, Germany

<sup>2</sup> Department of Cardiology and Angiology I, Heart Center Freiburg University, Germany

<sup>3</sup> Division of Vascular Medicine, Department of Cardiovascular Medicine, University Hospital Muenster, Germany

<sup>4</sup> Clinical Trials Unit, Medical Center – University of Freiburg, Germany

<sup>5</sup> Department of Cardiology, Angiology, Pulmonology, University of Heidelberg, Germany

<sup>6</sup> Department of Orthopaedics and Traumatology, University Hospital Basel, Switzerland

## Corresponding author:

Klaus Kaier, PhD

Medical Center – University of Freiburg, Institute of Medical Biometry and Statistics

Stefan-Meier-Str. 26

79104 Freiburg, Germany

phone: + 49 (0)761 203-6807

e-mail: [kaier@imbi.uni-freiburg.de](mailto:kaier@imbi.uni-freiburg.de)

Word count excluding title page, abstract, references, figures and tables: 2947

**ABSTRACT**

**Keywords:** TAVI, volume-outcome; minimum volume standards; hospital quality; mortality

**Objectives:** We examine the volume-outcome relationship in isolated transcatheter aortic valve implantations (TAVI). Our interest was whether the volume-outcome relationship for TAVI exists on the center level, whether it occurs equally for different outcomes, and how it develops over time.

**Design:** Secondary data analysis of electronic health records. The comprehensive German Federal Bureau of Statistics DRG database was queried for data on all isolated TAVI procedures performed in Germany between 2008 and 2014. Logistic and linear regression analyses were carried out. Risk-adjustment was applied using a predefined set of patient characteristics to account for differences in the risk factor composition of the patient populations between centers and over time. Centers performing TAVI were stratified into groups performing <50, 50-99, and  $\geq 100$  procedures per year.

**Setting:** Germany 2008 - 2014.

**Participants:** All patients undergoing isolated TAVI in the observation period.

**Interventions:** none.

**Primary and secondary outcome measures:** In-hospital mortality, bleeding, stroke, probability of ventilation >48 hours, length of hospital stay, and reimbursement.

**Results:** Between 2008 and 2014, a total of 43,996 TAVI procedures were performed in 113 different centers in Germany with a total of 2,532 cases of in-hospital mortality. Risk-adjusted in-hospital mortality decreases over the years and is lower the higher the annual procedure volume at the center is. The magnitude of the latter effect declines over the observation period. Our results indicate a ceiling effect in the volume-outcome relationship: The volume-outcome relationship is eminent in circumstances of relatively unfavorable outcomes. Alongside improving outcomes, however, the volume-outcome relationship decreases. Also, a volume-outcome relationship seems to be absent in circumstances of constantly low event rates.

**Conclusions:** The hypothesized volume-outcome relationship for TAVI exists but diminishes and may disappear over time. This should be taken into account when considering mandatory minimum thresholds.

## STRENGTHS AND LIMITATIONS OF THIS STUDY

- Study based on administrative data; coding errors are inevitable, however cardiovascular diagnosis-related groups are reviewed by independent physicians on behalf of health insurers.
- Risk-adjustment included a number of parameters whose reliability cannot be fully secured, and we cannot guarantee that all parameters of relevance are included in the model.
- Hospital volume was classified into three fixed categories, which is in line with thresholds from official guidelines and previous literature, but might hide possible effects related to very high volumes.
- The dataset omits baseline diagnoses of pure aortic regurgitation, as well as patients who underwent a concomitant cardiac procedure, which makes sense from a clinical perspective, but complicates comparisons and might cause bias.
- The study provides comprehensive data on everyday TAVI practice in a large industrialized country over a multiyear period.

## KEY QUESTIONS

### What is already known about this subject?

After their introduction, outcomes of new interventions are subject to a learning curve effect, meaning that outcomes improve over a period of time and then level off. The volume of procedures performed at an institution can influence this process, and is thought to have some effect on patient outcomes even after learning is complete (volume-outcome-hypothesis).

### What does this study add?

This study tracks patient outcomes by center procedure volume in all transcatheter aortic valve implantation (TAVI) procedures performed in Germany between the procedure's introduction in 2008 and 2014, providing empirical evidence on shape and extent of the above described effects for this procedure.

### How might this impact on clinical practice?

This data is of interest to clinical practitioners, hospital administrators, and policy makers involved in the implementation of new clinical procedures.

**COMPETING INTERESTS AND FUNDING**

The authors declare no conflicts of interest. There was no external funding for this work.

**DATA SHARING STATEMENT**

No additional data available.

**AUTHORSHIP STATEMENT**

KK and JR developed the research question and designed the methodology. VO, HR, LF, CvzM, CB, MZ and JR provided the medical knowledge of German TAVI practice informing the study design. KK defined the categories, outcomes and measures and developed and implemented the formal analysis and statistical with support by WV and CS. KK and JR collected the data and evidence. KK, VO, and WV interpreted and contextualized the results. KK and PH wrote the initial draft of the article, with JR contributing. All authors participated in the critical revision of the article and provided final approval of the version to be published.

## INTRODUCTION

Transcatheter aortic valve implantation (TAVI) is a rapidly evolving technique for therapy of aortic stenosis, with a very early and pronounced utilization in Germany [1]. Previous studies report hospital-specific learning curves with respect to in-hospital outcomes such as procedural success, mortality and clinical complications of varying lengths and magnitudes [2–6]. In general, learning curve effects within and between centers can to some degree be explained by the volume of procedures performed at the center. This relationship can be summed up as the “practice-makes-perfect hypothesis”, according to which quality of care either increases with the number of patients as a result of economies of scale, with a competing explanation of “selective-referral”, according to which higher-quality hospitals attract greater demand and therefore have a greater volume of patients [7,8].

There are a number of criticisms on empirical analyses on the volume-outcome relationship: Many studies lack appropriate adjustment for differences in the risk factor composition of the patient populations between centers [9,10]. Secondly, most studies focus on in-hospital mortality only [11], which is easy to measure, but it is recommended to include additional quality measurements. Finally, most studies divided patients into groups of equal size for analyzing the volume-outcome relationship, which makes it difficult to make use of such results when justifying specific volume thresholds [6,12–14].

Although the evidence regarding the existence of an inverse relationship between the number of TAVI procedures and related outcomes is limited [15,16], medical authorities in Germany and several other countries have issued guidelines calling for minimum numbers of procedures for primary operators performing TAVI [17–20]. There however remains some question whether, firstly, the volume-outcome relationship outlined above exists on the center level regarding TAVI and, secondly, whether or not it takes place in all outcomes and complications equally, and how an existing volume-outcome relationship might change over the years.

To address these questions, we calculated annual procedure volumes for all German hospitals that performed TAVI procedures between January 2008 and December 2014. In order to account for differences in the patient population between high-, medium-, and low-volume centers and over time, we carried out baseline-adjusted regression analyses for the endpoints in-hospital mortality, bleeding, stroke, probability of ventilation >48 hours, length of hospital stay, and reimbursement.

## METHODS

### Data

Since 2005, data on all hospitalizations in Germany have been available for scientific use via the Diagnosis Related Groups (DRG) statistics collected by the Research Data Center of the Federal Bureau of Statistics (DESTATIS). These hospitalization data, including diagnoses and procedures, are a valuable source of representative nationwide data on the in-hospital treatment of patients. This database represents a virtually complete collection of all hospitalizations in German hospitals that are reimbursed according to the DRG system. From this database [1], we have extracted data on 43,996 cases of isolated TAVI for our analysis.

Our study did not involve direct access by the investigators to data on individual patients but only access to summary results provided by the Research Data Center. Therefore, approval by an ethics committee and informed consent were determined not to be required, in accordance with German law. All summary results were anonymized by DESTATIS. In practice, this means that any information allowing the drawing of conclusions regarding a single patient or a specific hospital are censored by DESTATIS to guarantee data protection. Especially the use of the anonymous, persistent "institute indicator of hospitals" is highly restricted in order not to publish any information directly attributable to a single hospital.

As described previously [1,21], we were able to use the OPS codes (OPS codes: 5-35a.0 in 2007 and 5-35a.00, 5-35a.01 and 5-35a.02 from 2008) to identify all TAVI procedures performed (and reimbursed) in Germany between 2008 and 2014. Patients with a baseline diagnosis of pure aortic regurgitation (main or secondary diagnosis other than I35.0, I35.2, I06.0, I06.2) and those with concomitant cardiac surgery or percutaneous coronary intervention were not included in this analysis. Although some concomitant procedures might be informative (a cardiac surgery procedure during the same hospital stay as TAVI might likely represent a complication following a TAVI procedure), these cases cannot be consistently identified in our dataset as, in many cases, concomitant procedures might have taken place in another center. A complete list of procedure codes can be found in Table S1, a more detailed discussion of the data source may be found in a previous manuscript [1,21].

### Patient and Public Involvement



1  
2  
3 The development of the research question was guided by the intention to provide hospitals and  
4 policymakers with empirical evidence that enables them to structure the infrastructure in such a way as to  
5 deliver the best possible outcomes to patients. The selected outcome measures represent the most  
6 severe complications to the procedure and are of high significance to patient quality of life after the  
7 intervention. There was, however, no direct involvement of patients in the design, the recruitment and  
8 conduct of the study, nor will the results be disseminated to study participants as the study was based on  
9 anonymized administrative data.  
10  
11  
12  
13  
14

### 15 16 **Measures**

17  
18 Regarding the in-hospital complications, bleeding was defined as requiring a transfusion of more than 5  
19 units of red blood cells (RBC). For all other comorbidities and complications the existing anamnestic or  
20 acute distinctive codes were used (we have discussed OPS and ICD codes in greater detail previously  
21 [21]).  
22  
23  
24

25  
26 In order to analyze possible effects of the above discussed mandatory minimum quantities, the number of  
27 procedures per year and center was categorized (i.e.  $n < 50$ ,  $50 \leq n < 100$ ,  $n \geq 100$ ) on the basis of an  
28 anonymous, persistent "institute indicator of hospitals" provided by DESTATIS. These particular  
29 thresholds are applied because the minimum number of 50 procedures is often mentioned in official  
30 TAVI-guidelines [17–20], and these thresholds are widely applied in the literature [22–24].  
31  
32  
33  
34

35  
36 The primary outcome was in-hospital mortality. Secondary outcomes include post-procedural  
37 complications such as stroke and bleeding events (transfusion of  $\geq 5$  RBC), as well as reimbursement,  
38 length of hospital stay and proportion of patients with ventilation  $> 48$ h.  
39  
40  
41

### 42 43 **Statistical analysis**

44  
45 In a first step, multivariate regression analyses were carried out for the different endpoints. In a previous  
46 study, Reinöhl et al. [1] identified 21 baseline patient characteristics to describe risk profiles between  
47 procedural groups. For risk adjustment, all of these 21 baseline patient characteristics were included as  
48 covariates (all covariates listed in Table 1) in the respective regression analyses. In addition, an  
49 interaction term between time (in years) and the above mentioned annual volume categories was  
50 included in the regression analyses in order to investigate the volume-outcome relationship over the  
51 years.  
52  
53  
54  
55  
56  
57

1  
2  
3  
4  
5  
6  
7  
8  
9  
10  
11  
12  
13  
14  
15  
16  
17  
18  
19  
20  
21  
22  
23  
24  
25  
26  
27  
28  
29  
30  
31  
32  
33  
34  
35  
36  
37  
38  
39  
40  
41  
42  
43  
44  
45  
46  
47  
48  
49  
50  
51  
52  
53  
54  
55  
56  
57  
58  
59  
60

For peer review only

**Table 1: Baseline characteristics (2008-2014)**

|                                                     |               |
|-----------------------------------------------------|---------------|
| N                                                   | 43,996        |
| Female                                              | 55.87%        |
| Age in years, mean/SD                               | 80.95/6.11    |
| Estimated logistic EuroSCORE <sup>1</sup> , mean/SD | 22.21%/13.57% |
| Aortic valve stenosis as main diagnosis             | 68.22%        |
| Combined aortic valve diseases as main diagnosis    | 26.56%        |
| Heart failure                                       |               |
| NYHA II                                             | 8.26%         |
| NYHA III or IV                                      | 41.66%        |
| Hypertension                                        | 62.66%        |
| CAD                                                 | 46.88%        |
| Previous myocardial infarction                      |               |
| within 4 months                                     | 1.59%         |
| within 1 year                                       | 0.75%         |
| after 1 year                                        | 4.35%         |
| Previous CABG                                       | 12.75%        |
| Previous cardiac surgery                            | 18.06%        |
| Peripheral vascular disease                         | 12.39%        |
| Carotid disease                                     | 6.17%         |
| COPD                                                | 15.14%        |
| Pulmonary hypertension                              | 22.32%        |
| Renal disease                                       |               |
| GFR <15ml/min                                       | 2.95%         |
| GFR <30ml/min                                       | 4.90%         |
| Atrial fibrillation                                 | 45.93%        |
| Diabetes                                            | 33.30%        |

<sup>1</sup>For calculation of the logistic EuroSCORE, we were able to populate all fields except for critical preoperative state and left ventricular function. In these we assumed an inconspicuous state (i.e. no critical preoperative state and no left ventricular dysfunction) and thus calculated a best-case scenario.

Abbreviations: NYHA – New York Heart Association Functional Classification; CAD – coronary artery disease; CABG – coronary artery bypass graft; COPD – chronic obstructive pulmonary disease; GFR – glomerular filtration rate.

Please note that in comparison to the data published by Reinöhl et al., one TA-TAVI procedure (in 2010) needed to be removed from the dataset due to incomplete information.

1  
2  
3 Logistic and linear regression analyses are applied for dichotomous and continuous endpoints,  
4 respectively. The question of how to account for patients treated in the same hospital was discussed  
5 previously [13,25,26]. As recommended in a previous study that also used data from the German DRG-  
6 statistic [13], we used cluster-robust standard errors to account for this dependency.  
7  
8

9  
10 Risk-adjusted rates and means within each year and hospital volume category were obtained by  
11 computing the corresponding predicted probabilities or means, respectively, for an artificial subject with  
12 each confounder set to its mean value (prediction at the means, see Table 1 for mean values of all  
13 confounders). Thereby, risk-adjusted rates and means are taking two aspects into account: (1) change in  
14 the patients risk factors compositions over the years, and (2) differences in the patients risk factors  
15 compositions within different hospital volume categories. Risk-adjusted rates and means are therefore  
16 interpreted as the 'true' procedure-related outcomes independent of changes in the patient population  
17 over the years and differences between low, medium, and high-volume centers. Please note that this  
18 implies the assumption that all outcome relevant parameters are used for risk-adjustment. Unfortunately,  
19 we cannot guarantee that all parameters of relevance are included in the model. In fact, the administrative  
20 dataset lacks relevant clinical information (such as echocardiographic findings or anatomical  
21 characteristics).  
22  
23  
24  
25  
26  
27  
28  
29  
30  
31  
32

33 The visualization of these risk-adjusted rates or means together with their 95% confidence intervals  
34 constitutes the main analytical approach in this paper. To assess the statistical significance of the  
35 observed volume-outcome relationship, of the time trend and a potential change of the volume-outcome  
36 relationship over time, we applied to the estimated rates or means a random effects meta regression  
37 (command metareg [27]) with time and volume as continuous covariates. A model with an interaction term  
38 was used to assess the change in the volume-outcome relationship. A model without an interaction was  
39 used to assess the main effects.  
40  
41  
42  
43  
44  
45

46 Standardized reimbursement data is only available starting in 2010 due to a change in the reimbursement  
47 system making previous data difficult to compare. In Germany, reimbursement is based on DRGs which  
48 are defined by the patients' diagnoses, gender and age, treatment procedures, complications or  
49 comorbidities, and further attributes. Based on this data, a predetermined reimbursement rate per case is  
50 calculated. Hospitals receive additional reimbursement for long-stay outlier cases [28]. Furthermore,  
51  
52  
53  
54  
55  
56  
57  
58  
59  
60

1  
2  
3 additional reimbursement is possible for very complex intensive care treatments, which have to be proven  
4  
5 by documentation of illness severity and treatment effort during ICU stay [29].  
6

7 All analyses were carried out using Stata 13.1 (StataCorp, College Station, Texas, USA).  
8  
9

## 10 **RESULTS**

11  
12 Between 2008 and 2014, a total of 43,996 TAVI procedures were performed in 113 different centers in  
13  
14 Germany. The total number of TAVI procedures performed per year increased markedly over the  
15  
16 observation period, from 1,122 in 2008 to 11,559 in 2014 (see Table 2).  
17  
18  
19  
20  
21  
22  
23  
24  
25  
26  
27  
28  
29  
30  
31  
32  
33  
34  
35  
36  
37  
38  
39  
40  
41  
42  
43  
44  
45  
46  
47  
48  
49  
50  
51  
52  
53  
54  
55  
56  
57  
58  
59  
60

**Table 2: Number of procedures with regard to the performed TAVI volume of a distinct center in a given year.**

| <b>TAVI Volume in Center</b>               | <b>2008</b>            | <b>2009</b>            | <b>2010</b>       | <b>2011</b>       | <b>2012</b>       | <b>2013</b>       | <b>2014</b>        |
|--------------------------------------------|------------------------|------------------------|-------------------|-------------------|-------------------|-------------------|--------------------|
| <50 procedures, n (number of centers)      | 613 (40)               | 1,234 (61)             | 1,155 (51)        | 1,107 (43)        | 960 (36)          | 765 (31)          | 617 (30)           |
| 50-99 procedures, n (number of centers)    | 236 (3)                | 658 (10)               | 1,875 (26)        | 1,957 (27)        | 1,569 (20)        | 1,930 (25)        | 1,135 (16)         |
| >=100 procedures, n (number of centers)    | 273 (n/a*)             | 707 (n/a)              | 1,776 (3)         | 3,459 (7)         | 5,711 (16)        | 6,452 (9)         | 9,807 (20)         |
| <b>Total number, n (number of centers)</b> | <b>1,122 (&gt;=44)</b> | <b>2,599 (&gt;=72)</b> | <b>4,806 (80)</b> | <b>6,523 (77)</b> | <b>8,240 (72)</b> | <b>9,147 (65)</b> | <b>11,559 (66)</b> |

Please note that the numbers of procedures performed per year at a given center were not constant over the observation period, so that it is possible for a center to fall into a different volume group in a different year. Number of centres in parentheses.

\* n/a = not available, exact number censored by DESTATIS due to data protection concerns

1  
2  
3 As reported previously [1], substantial reductions in in-hospital mortality have been achieved between  
4 2008 and 2013, and we find this trend to continue into 2014. Regarding center-specific procedure  
5 volumes of all TAVI procedures, it appears that the differences in unadjusted in-hospital mortality  
6 between the procedure volume groups (<50, 50-99, and >=100) steadily decline over the years (see  
7 Table 3). Figure 1 A provides risk-adjusted in-hospital mortality rates allowing for comparison despite  
8 possible differences in the patient selection process and consequently the risk factor composition  
9 between hospitals in the different procedure volume groups and over time (See Table S2 –Table S7 for  
10 details of the process used to generate the results shown in Figure 1 A). These results indicate that risk-  
11 adjusted in-hospital mortality rates (1) steadily decrease over the years (annual change: -0.58 percentage  
12 points (pp),  $p<0.001$ ), are (2) lower the higher the procedure volume at the hospital is (volume effect: -  
13 0.74pp,  $p=0.002$ ), but that (3) this volume effect declines over the seven year observation period ( $p$ -value  
14 of interaction term:  $p=0.027$ ; annual change of volume effect: 0.2pp).  
15  
16  
17  
18  
19  
20  
21  
22  
23  
24  
25  
26  
27  
28  
29  
30  
31  
32  
33  
34  
35  
36  
37  
38  
39  
40  
41  
42  
43  
44  
45  
46  
47  
48  
49  
50  
51  
52  
53  
54  
55  
56  
57  
58  
59  
60

Table 3: Unadjusted in-hospital outcomes with regard to the performed TAVI volume of a distinct center in a given year.

|                  | Mortality, % | Stroke, % | Bleeding, % | Length of stay, mean in days | Reimbursement, mean in € | Proportion of patients with ventilation >48h, % |
|------------------|--------------|-----------|-------------|------------------------------|--------------------------|-------------------------------------------------|
| <b>2008</b>      |              |           |             |                              |                          |                                                 |
| <50 procedures   | 10.11%       | 3.26%     | 14.36%      | 19.2                         |                          | 9.79%                                           |
| 50-99 procedures | 9.32%        | 2.12%     | 11.44%      | 21.8                         |                          | 6.78%                                           |
| >=100 procedures | 6.59%        | 2.56%     | 7.33%       | 14.7                         |                          | 4.76%                                           |
| <b>2009</b>      |              |           |             |                              |                          |                                                 |
| <50 procedures   | 9.81%        | 3.57%     | 14.18%      | 21.6                         |                          | 9.48%                                           |
| 50-99 procedures | 8.36%        | 3.34%     | 11.25%      | 18.5                         |                          | 7.14%                                           |
| >=100 procedures | 6.08%        | 2.12%     | 7.21%       | 18.0                         |                          | 7.36%                                           |
| <b>2010</b>      |              |           |             |                              |                          |                                                 |
| <50 procedures   | 9.00%        | 2.51%     | 12.12%      | 21.0                         | 37,071€                  | 8.74%                                           |
| 50-99 procedures | 8.11%        | 2.56%     | 11.41%      | 19.1                         | 36,173€                  | 8.69%                                           |
| >=100 procedures | 6.14%        | 2.20%     | 6.25%       | 17.0                         | 35,074€                  | 5.01%                                           |
| <b>2011</b>      |              |           |             |                              |                          |                                                 |
| <50 procedures   | 7.68%        | 2.35%     | 9.39%       | 20.0                         | 35,984€                  | 8.04%                                           |
| 50-99 procedures | 8.02%        | 2.35%     | 9.04%       | 19.3                         | 35,424€                  | 8.28%                                           |
| >=100 procedures | 5.87%        | 3.01%     | 9.31%       | 17.3                         | 35,046€                  | 7.29%                                           |
| <b>2012</b>      |              |           |             |                              |                          |                                                 |
| <50 procedures   | 6.15%        | 2.29%     | 8.44%       | 18.7                         | 35,294€                  | 7.29%                                           |
| 50-99 procedures | 7.07%        | 2.42%     | 8.41%       | 18.9                         | 34,798€                  | 5.48%                                           |
| >=100 procedures | 5.03%        | 2.10%     | 6.30%       | 16.7                         | 34,233€                  | 5.39%                                           |
| <b>2013</b>      |              |           |             |                              |                          |                                                 |
| <50 procedures   | 5.49%        | 2.09%     | 9.28%       | 20.2                         | 35,808€                  | 6.93%                                           |
| 50-99 procedures | 5.85%        | 2.33%     | 6.53%       | 18.2                         | 34,650€                  | 4.56%                                           |
| >=100 procedures | 5.29%        | 2.70%     | 5.98%       | 16.3                         | 34,456€                  | 5.29%                                           |
| <b>2014</b>      |              |           |             |                              |                          |                                                 |
| <50 procedures   | 5.34%        | 2.75%     | 5.99%       | 19.9                         | 35,993€                  | 6.15%                                           |
| 50-99 procedures | 4.58%        | 2.20%     | 5.73%       | 18.3                         | 34,904€                  | 4.32%                                           |
| >=100 procedures | 3.70%        | 2.28%     | 4.22%       | 15.3                         | 34,771€                  | 3.92%                                           |

Please note that the numbers of procedures performed per year at a given center were not constant over the observation period, so that it is possible for a center to fall into a different volume group in a different year.



1  
2  
3 Over the seven years of data we analyzed, a slight decreasing trend was visible in the risk-adjusted in-  
4 hospital stroke rate, which started out at 2-2,5% in 2008-2009 and ranged from 1,5-2% in 2013-2014  
5 (Figure 1 B). Volume-outcome relationship was actually negative for years following 2010, with higher-  
6 volume centers having higher stroke rates.  
7  
8

9  
10 Risk-adjusted bleeding rates (Figure 1 C), in contrast, showed a clear beneficial effect of higher center  
11 procedure volumes for all years but 2011. The magnitude of the effect was distinct from 2008-2010 and  
12 decreased in the following years in parallel with an ongoing marked decrease in the general likelihood of  
13 bleeding complications, but still was present in 2013/2014.  
14  
15

16  
17 For risk-adjusted in-hospital ventilation rate (>48h) (Figure 1 D), a pronounced beneficial effect of higher  
18 center procedure volumes persisted throughout the observation period. In addition, risk-adjusted in-  
19 hospital ventilation rates decreased substantially over the years. As for bleeding, the magnitude of the  
20 volume effect was distinct in the first years but steadily declined over the seven year period (annual  
21 change of the volume effect: 0.30pp,  $p=0.041$ ).  
22  
23

24  
25 Risk-adjusted in-hospital length of stay shows a strong beneficial effect of center procedure volume  
26 (Figure 2 A). Unlike the situation found for the endpoints mortality and bleeding, the magnitude of the  
27 effect did not decrease much over the observed timeframe. There also is a slight reduction in average  
28 length of stay over the years.  
29  
30

31  
32 As shown in Figure 2 B, there is a drop in the overall reimbursement level from 2010-2012, but  
33 reimbursement stays roughly the same thereafter. In much the same way as found for length of hospital  
34 stay, risk-adjusted amount of reimbursement decreased only slightly over time, and showed a large  
35 volume effect which did not change over the five year period.  
36  
37  
38  
39  
40  
41  
42  
43  
44

## 45 **CONCLUSIONS**

46  
47 Our study shows mixed results regarding a volume-outcome relationship in TAVI procedures in German  
48 hospitals. First of all, TAVI-related in-hospital mortality decreased substantially between 2008 and 2014  
49 and was lower the higher the procedure volume at the respective hospital is. The magnitude of this  
50 volume-outcome relationship, however, declines over the observation period. Especially in later years  
51 (2012-2014) differences in mortality between low-, medium-, and high-volume centers are small.  
52  
53  
54  
55  
56  
57

1  
2  
3 Regarding in-hospital mortality and secondary endpoints, a volume-outcome relationship is eminent in  
4 circumstances of relatively unfavorable outcomes (see early years of mortality, bleeding, and ventilation)  
5 and decreases as outcomes improve (later years of mortality, bleeding, and ventilation), but is not present  
6 in circumstances of constantly low event rates (see stroke). In addition, in most of the cases when we  
7 observe a distinct annual decrease, we also observe a decreasing volume effect over time. Presumably,  
8 the small centers succeed in participating at the system level learning curve to a degree which allows  
9 them to catch up to some degree to the group of high-volume. Unfortunately, our data does not allow  
10 addressing the question whether this is due to exchange of expertise or to increasing cumulative  
11 experience. The group of small centers may also benefit from there being only a reduced capacity for  
12 improvement even in large volume centers some years after the introduction of a new procedure.  
13  
14

15  
16 Interestingly, decreases in the volume effect over time were not observed for the endpoints of in-hospital  
17 length of stay and reimbursement. Presumably, this might be due to the fact that high-volume centers are  
18 at a major advantage in streamlining clinical workflows before and after the procedure.  
19  
20

21  
22 Two recent studies showed volume-outcome relationships for TAVI procedures performed in US hospitals  
23 in 2012 [15,16]. In both studies, patients were divided into groups of equal sample size. Disregarding the  
24 accompanying problems regarding the external validity of the results [12,13], the results shown in these  
25 studies are similar to ours: Among others, inverse volume-outcome relationships were shown for the  
26 endpoints death and bleeding [15,16]. One of the two studies also included the endpoints length of stay  
27 and hospitalization costs and identified significant differences between the observed hospital volume  
28 quartiles (TAVI/year cutoffs  $\leq 5$ , 6-10, 11-20 and  $>20$ ) [16]. The other study also included the endpoint  
29 stroke and did not show significant differences between volume groups (TAVI cutoffs: 20 or 10 cases for  
30 different access routes) [15].  
31  
32  
33  
34  
35  
36  
37  
38  
39  
40  
41  
42  
43

44  
45 As stated before, medical authorities in several countries have issued guidelines calling for minimum  
46 numbers of procedures for primary operators performing TAVI [17–20]. In Germany, such mandatory  
47 minimums are not yet implemented, but a mandatory number of 50 TAVI procedures annually is officially  
48 recommended [20], and this number is also mentioned in guidelines from the UK, Canada and Portugal  
49 [17–19]. Our results confirm the existence of a volume-outcome relationship for TAVI procedures  
50 between 2008 and 2014, and these effects are in line with existing evidence from TAVI procedures  
51 performed in US hospitals [6,15,16]. The above discussed weakening of the volume-outcome relationship  
52  
53  
54  
55  
56  
57

1  
2  
3 over time, however, relativizes the rationale behind mandatory minimum numbers of procedures: The  
4 volume-outcome relationship may be considerable in the years following the introduction of a new  
5 procedure when there still is a lot of room for improvement (in the two of the cited studies [15,16], i.e.  
6 2012). After a few years, then, the association between procedure numbers and better performance may  
7 diminish (see our results regarding the year 2014 and presumably thereafter). In the worst case, the  
8 volume effect is already gone by the time mandatory minimums are finally implemented, or the  
9 implementation hinders the system to reach optimal health service without restrictions. It should be,  
10 however, noted that the average number of TAVI procedures per hospital is larger in Germany compared  
11 to most other countries, and that hence the time span until such a point is reached may be longer in other  
12 countries.  
13  
14  
15  
16  
17  
18  
19  
20

21 This might be especially problematic since mandatory minimum quantities on the center level are not free  
22 of further disadvantages. They are thought to lead to centralization of procedures in large hospitals,  
23 necessitating costly patient transfers and potentially worse aftercare. In addition, it is unclear how an  
24 optimal threshold could be set (and adjusted yearly) and by whom, how effects of physician volume and  
25 hospital volume should be combined, whether low-volume hospitals and their surgeons perceive the  
26 thresholds as new incentives to operate, and how new and innovative hospitals might be able to enter the  
27 market [30]. The latter question is especially relevant for TAVI since a recent study showed that between  
28 2010 and 2015 a new center entering the TAVI market needed to perform 54 procedures to achieve  
29 clinical outcomes comparable to those reported in high-volume centers [31]. According to the authors of  
30 the study, this represents more than 2 years of continuous activity [31].  
31  
32  
33  
34  
35  
36  
37  
38  
39

40 In addition, the question remains how to integrate the observed volume effects into the existing theory.  
41 The “practice-makes-perfect hypothesis” implies a contrary causal relationship than the theory of  
42 “selective-referral” [7,8], and we cannot answer the question whether volume generates quality (practice  
43 makes perfect), quality generates volume (selective referral), or both.  
44  
45  
46  
47

48 Furthermore, Gandjour et al. differentiated the “practice-makes-perfect hypothesis” into learning curve  
49 effects, economies of scope, and the concept of a focused factory [32]. Improved outcomes may result  
50 from economies of scale: every time doctors perform a procedure, they gain experience. Economies of  
51 scope, in contrast, would occur from the simultaneous performance of dissimilar procedures. In the TAVI  
52 context, this means that a high-volume center might see improved TAVI outcomes as a result of the  
53  
54  
55  
56  
57

1  
2  
3 performance of high numbers of other procedures. Accordingly, Epstein already raised the question  
4 whether similar procedures should also be counted towards a set volume threshold [30]. The focused  
5 factory concept, in contrast, assumes that focusing on a small number of procedures could also be  
6 favorable [32]. Unfortunately, none of the existing approaches analyzed whether the volume-outcome  
7 relationship differs in accordance to the number of other (closely related) procedures conducted in the  
8 respective center.  
9

10  
11  
12  
13  
14 Our study has several strengths and limitations: First of all, it is based on administrative data, and coding  
15 errors are inevitable. However, about 20% of all cardiovascular diagnosis-related groups are reviewed by  
16 independent teams of physicians on behalf of the health insurers, which should ensure a generally good  
17 reliability of the data.  
18  
19

20  
21  
22 Second, our risk-adjustment included a number of parameters whose reliability cannot be fully secured,  
23 and we cannot guarantee that all parameters of relevance are included in the model. A major limitation is  
24 that the data source does not include information on the type of device used in individual TAVI  
25 procedures. Therefore, information regarding the type of device and access route was not used for risk  
26 adjustment. In addition, information regarding the experience of surgeons at each centre would be highly  
27 relevant for the analysis but is also unavailable.  
28  
29

30  
31  
32 Thirdly, in terms of the categories used, hospital volume was classified into three fixed categories (<50,  
33 50-99, >=100), which is in line with thresholds mentioned in official guidelines and previously applied in  
34 the literature, but might result in possible effects related to very high volumes being hidden in the  
35 analyzed group of patients treated in hospitals with >=100 cases per year.  
36  
37

38  
39  
40 Lastly, the dataset omits patients with a baseline diagnosis of pure aortic regurgitation, as well as those  
41 who underwent TAVI with any other concomitant cardiac procedure. This makes sense from a clinical  
42 perspective, but further complicates direct comparisons with other administrative datasets and possibly  
43 caused bias in the measurement of hospital volume and outcome.  
44  
45

46  
47  
48 A major strength of the study is that it provides comprehensive data on everyday TAVI practice in a large  
49 industrialized country over a multiyear period.  
50  
51

1  
2 We conclude that the hypothesized volume-outcome relationship for TAVI exists but diminishes and may  
3 disappear over time. This should be taken into account when considering mandatory minimum  
4 thresholds.  
5  
6  
7  
8  
9  
10  
11  
12  
13  
14  
15  
16  
17  
18  
19  
20  
21  
22  
23  
24  
25  
26  
27  
28  
29  
30  
31  
32  
33  
34  
35  
36  
37  
38  
39  
40  
41  
42  
43  
44  
45  
46  
47  
48  
49  
50  
51  
52  
53  
54  
55  
56  
57  
58  
59  
60

For peer review only

1  
2  
3  
4  
5  
6  
7  
8  
9  
10  
11  
12  
13  
14  
15  
16  
17  
18  
19  
20  
21  
22  
23  
24  
25  
26  
27  
28  
29  
30  
31  
32  
33  
34  
35  
36  
37  
38  
39  
40  
41  
42  
43  
44  
45  
46  
47  
48  
49  
50  
51  
52  
53  
54  
55  
56  
57  
58  
59  
60

For peer review only

## Figure Legends

**Figure 1:** Risk-adjusted in-hospital mortality, stroke, bleeding and ventilation rates and their association with center-specific procedure volumes in a given year.

Estimates are based on risk-adjusted logistic regression analysis including all available patient characteristics as confounders (see Table 1). Predicted probabilities are calculated by setting each confounder to its mean value (prediction at the means, see Table 1 for means). Annual and volume effects were calculated using random effects meta regression based on the estimated rates. A separate model with an interaction term was used to assess the change in the volume-outcome relationship. pp= percentage points.

**Figure 2:** Risk-adjusted in-hospital length of stay and reimbursement and their association with center-specific procedure volumes in a given year.

Estimates are based on risk-adjusted linear regression analyses including all available patient characteristics as confounders (see Table 1). Predicted probabilities are calculated by setting each confounder to its mean value (prediction at the means, see Table 1 for means). Annual and volume effects were calculated using random effects meta regression based on the estimated means. A separate a model with an interaction term was used to assess the change in the volume-outcome relationship.

## Reference List

1. Reinöhl, J., Kaier, Klaus, Reinecke, Holger, Schmoor, Claudia, Frankenstein, Lutz, Vach, Werner, et al. Effect of Availability of Transcatheter Aortic Valve Replacement on Clinical Practice. *N Engl J Med.* 2015;373:2438–47.
2. Gurvitch R, Tay EL, Wijesinghe N, Ye J, Nietlispach F, Wood DA, et al. Transcatheter aortic valve implantation: lessons from the learning curve of the first 270 high-risk patients. *Catheter Cardiovasc Interv.* 2011;78:977–84.
3. Cerillo AG, Murzi M, Glauber M, Berti S. Quality Control and the Learning Curve of Transcatheter Aortic Valve Implantation. *JACC Cardiovasc Interv.* 2012;5:456.
4. Alli OO, Booker JD, Lennon RJ, Greason KL, Rihal CS, Holmes DR. Transcatheter Aortic Valve Implantation. *JACC Cardiovasc Interv.* 2012;5:72–9.
5. Arai T, Lefèvre T, Hovasse T, Hayashida K, Watanabe Y, O'Connor SA, et al. Evaluation of the learning curve for transcatheter aortic valve implantation via the transfemoral approach. *Int J Cardiol.* 2016;203:491–7.
6. Carroll JD, Vemulapalli S, Dai D, Matsouaka R, Blackstone E, Edwards F, et al. Procedural Experience for Transcatheter Aortic Valve Replacement and Relation to Outcomes. *J Am Coll Cardiol.* 2017;70:29–41.
7. Gaynor M, Seider H, Vogt WB. The volume-outcome effect, scale economies, and learning-by-doing. *Am Econ Rev.* 2005;95:243–7.
8. Luft HS, Hunt SS, Maerki SC. The volume-outcome relationship: practice-makes-perfect or selective-referral patterns? *Health Serv Res.* 1987;22:157–82.
9. Halm EA, Lee C, Chassin MR. Is volume related to outcome in health care? A systematic review and methodologic critique of the literature. *Ann Intern Med.* 2002;137:511–20.
10. Shahian DM, Normand S-LT. The volume-outcome relationship: from Luft to Leapfrog. *Ann Thorac Surg.* 2003;75:1048–58.
11. Barker D, Rosenthal G, Cram P. Simultaneous relationships between procedure volume and mortality: do they bias studies of mortality at specialty hospitals? *Health Econ.* 2011;20:505–18.
12. Christian CK, Gustafson ML, Betensky RA, Daley J, Zinner MJ. The Leapfrog volume criteria may fall short in identifying high-quality surgical centers. *Ann Surg.* 2003;238:447–57.
13. Hentschker C, Mennicken R. The Volume-Outcome Relationship and Minimum Volume Standards—Empirical Evidence for Germany. *Health Econ.* 2015;24:644–58.
14. Reames BN, Ghaferi AA, Birkmeyer JD, Dimick JB. Hospital volume and operative mortality in the modern era. *Ann Surg.* 2014;260:244.
15. Kim LK, Minutello RM, Feldman DN, Swaminathan RV, Bergman G, Singh H, et al. Association between transcatheter aortic valve implantation volume and outcomes in the United States. *Am J Cardiol.* 2015;116:1910–5.



16. Badheka AO, Patel NJ, Panaich SS, Patel SV, Jhamnani S, Singh V, et al. Effect of hospital volume on outcomes of transcatheter aortic valve implantation. *Am J Cardiol*. 2015;116:587–94.
17. Webb J, Rodés-Cabau J, Fremes S, Pibarot P, Ruel M, Ibrahim R, et al. Transcatheter Aortic Valve Implantation: A Canadian Cardiovascular Society Position Statement. *Can J Cardiol*. 2012;28:520–8.
18. British Cardiovascular Intervention Society (BCIS) and the Society of Cardiothoracic Surgeons (SCTS). A position statement of the British Cardiovascular Intervention Society (BCIS) and the Society of Cardiothoracic Surgeons (SCTS) [Internet]. 2013 [cited 2015 Nov 12]. Available from: <http://www.bcis.org.uk/resources/documents/BCIS%20SCTS%20position%20statement.pdf>
19. Campante Teles R, Ribeiro VG, Patrício L, Neves JP, Vouga L, Fragata J, et al. Position statement on transcatheter aortic valve implantation in Portugal. *Rev Port Cardiol Engl Ed*. 2013;32:801–5.
20. Kuck KH, Eggebrecht H, Figulla HR, Haude M, Katus H, Möllmann H, et al. Qualitätskriterien zur Durchführung der transvaskulären Aortenklappenimplantation. *Kardiologe*. 2015;9:11–26.
21. Reinöhl, J., K. Kaier, Reinecke H, Schmoor C, Frankenstein, L., Vach, W., et al. Effect of Availability of Transcatheter Aortic Valve Replacement on Clinical Practice: Supplementary Appendix. *N Engl J Med*. 2015;373:2438–47.
22. Fedeli U, Alba N, Schievano E, Visentin C, Rosato R, Zorzi M, et al. Diffusion of good practices of care and decline of the association with case volume: the example of breast conserving surgery. *BMC Health Serv Res*. 2007;7:167.
23. Nguyen NT, Paya M, Stevens CM, Mavandadi S, Zainabadi K, Wilson SE. The relationship between hospital volume and outcome in bariatric surgery at academic medical centers. *Ann Surg*. 2004;240:586–94.
24. Hollenbeak CS, Rogers AM, Barrus B, Wadiwala I, Cooney RN. Surgical volume impacts bariatric surgery mortality: a case for centers of excellence. *Surgery*. 2008;144:736–43.
25. Farley DE, Ozminkowski RJ. Volume-outcome relationships and inhospital mortality: the effect of changes in volume over time. *Med Care*. 1992;30:77–94.
26. Hamilton BH, Hamilton VH. Estimating surgical volume—outcome relationships applying survival models: accounting for frailty and hospital fixed effects. *Health Econ*. 1997;6:383–95.
27. Harbord RM, Higgins JP. Meta-regression in Stata. *Stata J*. 2008;8:493–519.
28. Quentin W, Geissler A, Scheller-Kreinsen D, Busse R. DRG-type hospital payment in Germany: The G-DRG system. *Euro Obs*. 2010;12:4–6.
29. Braun J-P, Bause H, Bloos F, Geldner G, Kastrup M, Kuhlen R, et al. Peer reviewing critical care: a pragmatic approach to quality management. *GMS Ger Med Sci*. 2010;8.
30. Epstein A. Volume and outcome - it is time to move ahead. *N Engl J Med*. 2002;346:1161–4.
31. Lunardi M, Pesarini G, Zivelonghi C, Piccoli A, Geremia G, Ariotti S, et al. Clinical outcomes of transcatheter aortic valve implantation: from learning curve to proficiency. *Open Heart*. 2016;3:e000420.

1  
2  
3 32. Gandjour A, Lauterbach KW. The practice-makes-perfect hypothesis in the context of other  
4 production concepts in health care. Am J Med Qual. 2003;18:171–5.  
5  
6  
7  
8  
9  
10  
11  
12  
13  
14  
15  
16  
17  
18  
19  
20  
21  
22  
23  
24  
25  
26  
27  
28  
29  
30  
31  
32  
33  
34  
35  
36  
37  
38  
39  
40  
41  
42  
43  
44  
45  
46  
47  
48  
49  
50  
51  
52  
53  
54  
55  
56  
57  
58  
59  
60

For peer review only

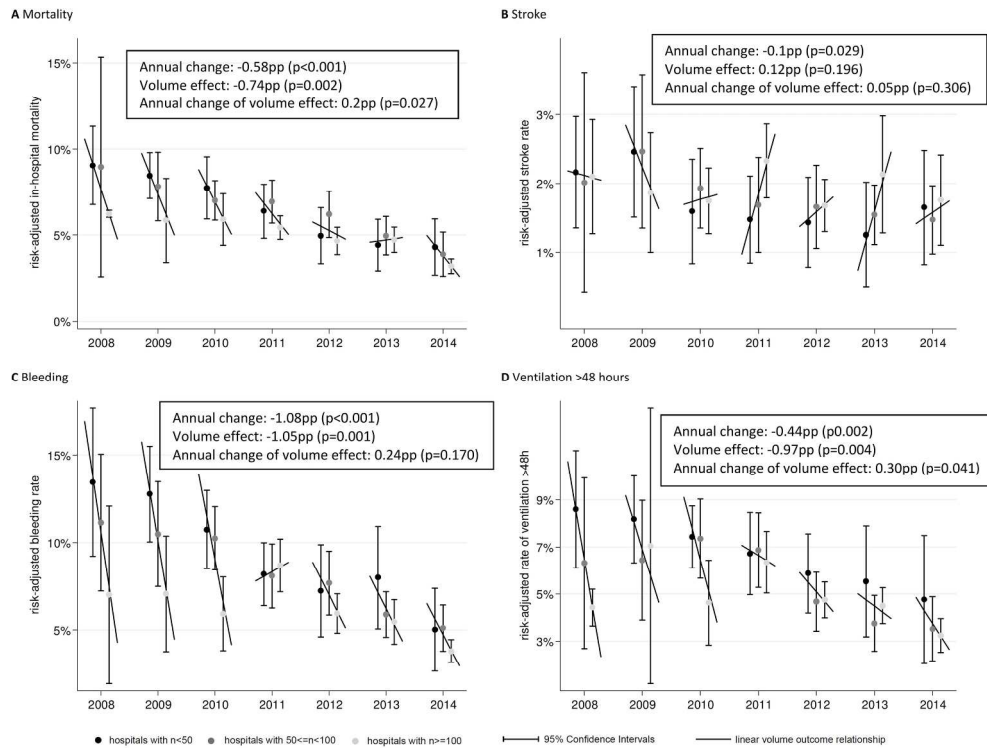

Caption : Figure 1: Risk-adjusted in-hospital mortality, stroke, bleeding and ventilation rates and their association with center-specific procedure volumes in a given year.!! + Estimates are based on risk-adjusted logistic regression analysis including all available patient characteristics as confounders (see Table 1). Predicted probabilities are calculated by setting each confounder to its mean value (prediction at the means, see Table 1 for means). Annual and volume effects were calculated using random effects meta regression based on the estimated rates. A separate model with an interaction term was used to assess the change in the volume-outcome relationship. pp= percentage points.

111x83mm (600 x 600 DPI)



Figure 2: Risk-adjusted in-hospital length of stay and reimbursement and their association with center-specific procedure volumes in a given year.

Estimates are based on risk-adjusted linear regression analyses including all available patient characteristics as confounders (see Table 1). Predicted probabilities are calculated by setting each confounder to its mean value (prediction at the means, see Table 1 for means). Annual and volume effects were calculated using random effects meta regression based on the estimated means. A separate a model with an interaction term was used to assess the change in the volume-outcome relationship.

81x32mm (600 x 600 DPI)

Table S1: Diagnosis and procedure codes used for this analysis

| OPS codes                            |                                                                                                                                   |
|--------------------------------------|-----------------------------------------------------------------------------------------------------------------------------------|
| 5-351.0*                             | Surgical aortic valve replacement                                                                                                 |
| 5-35a.0*                             | Transcatheter aortic valve replacement                                                                                            |
| 5-361.*, 5-362.*, 5-363.*            | Coronary artery bypass graft                                                                                                      |
| 5-351.1*, 5-351.2*, 5-353.1, 5-353.2 | Surgical mitral valve replacement/reconstruction                                                                                  |
| 5-351.4*                             | Surgical tricuspid valve replacement                                                                                              |
| 5-377.0 et seqq.                     | Permanent pacemaker implantation                                                                                                  |
| 8-800.7*<br>since 2010:<br>8-800.c*  | Transfusion of RBC                                                                                                                |
| Diagnosis                            |                                                                                                                                   |
| I35.0, I06.0                         | Aortic valve stenosis (degenerative/rheumatic)                                                                                    |
| I35.2, I06.2                         | Combined aortic valve diseases (degenerative/rheumatic)                                                                           |
| I50.1*                               | Left ventricular congestive heart failure ( <i>according to NYHA classes</i> )                                                    |
| I10*                                 | Arterial Hypertension                                                                                                             |
| I25.11, I25.12, I25.13               | Coronary artery disease                                                                                                           |
| I25.20, I25.21, I25.22               | Previous myocardial infarction ( <i>within 4 months/1 year/after 1 year</i> )                                                     |
| Z95.1                                | Previous coronary artery bypass graft                                                                                             |
| Z95.1 – Z95.4                        | Previous cardiac surgery                                                                                                          |
| I70.20-I70.25, I70.8, I70.9, I73.9   | Peripheral vascular disease                                                                                                       |
| I65.2                                | Carotid disease                                                                                                                   |
| I21*                                 | Acute myocardial infarction ( <i>within the last 28 days</i> )                                                                    |
| J44*                                 | Chronic obstructive pulmonary disease                                                                                             |
| I27*                                 | Pulmonary hypertension                                                                                                            |
| N18*                                 | Renal disease                                                                                                                     |
| N17*                                 | Acute kidney injury                                                                                                               |
| I48.1*                               | Atrial fibrillation                                                                                                               |
| E10* - E14*                          | Diabetes                                                                                                                          |
| I63*, I64                            | Stroke or cerebral infarction incl. occlusion and stenosis of cerebral and precerebral arteries, resulting in cerebral infarction |

Table S2: Results of the logistic regression model, transformation into discrete event probabilities and subsequent meta regressions

**First step:** Logistic regression model on 43,996 TAVI cases with in-hospital mortality as dependent variable, an interaction term (n\_ik\_year\_50\_100#year) between categorical time (in years) and volume categories and 22 predefined patient and procedural characteristics as potential confounder.

| n_ik_year_50_100               | OR    | p-value | 95% CI        |
|--------------------------------|-------|---------|---------------|
| procedure volume <50           | 1     |         |               |
| procedure volume 50-99         | 0.989 | 0.98    | 0.437 - 2.241 |
| procedure volume >=100         | 0.668 | 0.004   | 0.506 - 0.882 |
| year                           |       |         |               |
| 2008                           | 1     |         |               |
| 2009                           | 0.929 | 0.671   | 0.661 - 1.305 |
| 2010                           | 0.844 | 0.376   | 0.579 - 1.229 |
| 2011                           | 0.686 | 0.032   | 0.486 - 0.968 |
| 2012                           | 0.525 | 0.004   | 0.340 - 0.812 |
| 2013                           | 0.465 | 0.001   | 0.302 - 0.718 |
| 2014                           | 0.453 | 0.001   | 0.288 - 0.712 |
| n_ik_year_50_100#year          |       |         |               |
| procedure volume 50-99 # 2009  | 0.929 | 0.874   | 0.376 - 2.298 |
| procedure volume 50-99 # 2010  | 0.909 | 0.828   | 0.384 - 2.151 |
| procedure volume 50-99 # 2011  | 1.105 | 0.822   | 0.464 - 2.631 |
| procedure volume 50-99 # 2012  | 1.280 | 0.597   | 0.512 - 3.202 |
| procedure volume 50-99 # 2013  | 1.141 | 0.781   | 0.452 - 2.877 |
| procedure volume 50-99 # 2014  | 0.908 | 0.845   | 0.346 - 2.385 |
| procedure volume >=100 # 2009  | 1.007 | 0.981   | 0.583 - 1.740 |
| procedure volume >=100 # 2010  | 1.120 | 0.598   | 0.735 - 1.705 |
| procedure volume >=100 # 2011  | 1.260 | 0.223   | 0.869 - 1.827 |
| procedure volume >=100 # 2012  | 1.399 | 0.164   | 0.872 - 2.244 |
| procedure volume >=100 # 2013  | 1.606 | 0.046   | 1.009 - 2.558 |
| procedure volume >=100 # 2014  | 1.100 | 0.687   | 0.692 - 1.749 |
| Female                         | 0.902 | 0.045   | 0.815 - 0.998 |
| Age in years                   | 1.009 | 0.155   | 0.997 - 1.022 |
| Estimated logistic EuroSCORE   | 1.022 | 0.000   | 1.015 - 1.029 |
| Aortic valve stenosis          | 0.636 | 0.000   | 0.504 - 0.802 |
| Combined aortic valve diseases | 0.553 | 0.000   | 0.447 - 0.685 |
| NYHA II                        | 0.551 | 0.000   | 0.423 - 0.717 |
| NYHA III or IV                 | 1.550 | 0.000   | 1.264 - 1.900 |
| CAD                            | 1.034 | 0.517   | 0.934 - 1.144 |
| Hypertension                   | 0.698 | 0.000   | 0.612 - 0.797 |
| Previous MI (within 4 months)  | 0.683 | 0.048   | 0.467 - 0.997 |
| Previous MI (within 1 year)    | 1.042 | 0.881   | 0.608 - 1.785 |
| Previous MI (after 1 year)     | 0.979 | 0.816   | 0.821 - 1.169 |
| Previous CABG                  | 1.017 | 0.884   | 0.809 - 1.278 |
| Previous cardiac surgery       | 0.808 | 0.117   | 0.619 - 1.055 |
| Peripheral vascular disease    | 1.118 | 0.140   | 0.964 - 1.295 |
| Carotid disease                | 0.896 | 0.165   | 0.768 - 1.046 |
| COPD                           | 0.979 | 0.744   | 0.863 - 1.111 |
| Pulmonary hypertension         | 0.852 | 0.021   | 0.744 - 0.976 |
| GFR <15%                       | 1.770 | 0.000   | 1.443 - 2.170 |
| GFR <30%                       | 1.414 | 0.000   | 1.167 - 1.714 |
| Atrial fibrillation            | 1.211 | 0.000   | 1.115 - 1.315 |
| Diabetes                       | 1.024 | 0.640   | 0.926 - 1.133 |

**Second step:** Predicted probabilities are calculated by setting each confounder to its mean value (prediction at the means) using Stata's margins command with application of the atmeans option.

| n_ik_year_50_100#year         | Prob. | p-value | 95% CI        |
|-------------------------------|-------|---------|---------------|
| procedure volume <50 # 2008   | 0.090 | 0.000   | 0.068 - 0.113 |
| procedure volume <50 # 2009   | 0.085 | 0.000   | 0.071 - 0.098 |
| procedure volume <50 # 2010   | 0.077 | 0.000   | 0.059 - 0.095 |
| procedure volume <50 # 2011   | 0.064 | 0.000   | 0.048 - 0.08  |
| procedure volume <50 # 2012   | 0.050 | 0.000   | 0.033 - 0.066 |
| procedure volume <50 # 2013   | 0.044 | 0.000   | 0.029 - 0.059 |
| procedure volume <50 # 2014   | 0.043 | 0.000   | 0.027 - 0.059 |
| procedure volume 50-99 # 2008 | 0.090 | 0.006   | 0.026 - 0.153 |
| procedure volume 50-99 # 2009 | 0.078 | 0.000   | 0.058 - 0.098 |
| procedure volume 50-99 # 2010 | 0.070 | 0.000   | 0.059 - 0.082 |
| procedure volume 50-99 # 2011 | 0.069 | 0.000   | 0.057 - 0.082 |
| procedure volume 50-99 # 2012 | 0.062 | 0.000   | 0.049 - 0.076 |
| procedure volume 50-99 # 2013 | 0.050 | 0.000   | 0.038 - 0.061 |
| procedure volume 50-99 # 2014 | 0.039 | 0.000   | 0.026 - 0.052 |
| procedure volume >=100 # 2008 | 0.062 | 0.000   | 0.060 - 0.064 |
| procedure volume >=100 # 2009 | 0.058 | 0.000   | 0.034 - 0.083 |
| procedure volume >=100 # 2010 | 0.059 | 0.000   | 0.044 - 0.074 |
| procedure volume >=100 # 2011 | 0.054 | 0.000   | 0.047 - 0.061 |
| procedure volume >=100 # 2012 | 0.047 | 0.000   | 0.039 - 0.054 |
| procedure volume >=100 # 2013 | 0.047 | 0.000   | 0.040 - 0.055 |
| procedure volume >=100 # 2014 | 0.032 | 0.000   | 0.028 - 0.036 |

**Third step:** A random effects meta regression (using Stata's command metareg) with time and volume as continuous covariates was applied to the estimated rates.

|               | Coeff  | p-value | 95% CI          |
|---------------|--------|---------|-----------------|
| Volume effect | -0.007 | 0.002   | -0.012 - -0.003 |
| Annual change | -0.006 | 0.000   | -0.008 - -0.004 |

**Fourth step:** A second random effects meta regression model was applied including also an interaction term.

|                                | Coeff  | p-value | 95% CI          |
|--------------------------------|--------|---------|-----------------|
| Volume effect                  | -4.536 | 0.026   | -8.473 - -0.600 |
| Annual change                  | -0.011 | 0.000   | -0.016 - -0.006 |
| Annual change of volume effect | 0.002  | 0.027   | 0.000 - 0.004   |

Table S3: Results of the logistic regression model, transformation into discrete event probabilities and subsequent meta regressions

**First step:** Logistic regression model on 43,996 TAVI cases with stroke as dependent variable, an interaction term (n\_ik\_year\_50\_100#year) between categorical time (in years) and volume categories and 22 predefined patient and procedural characteristics as potential confounder.

| n_ik_year_50_100               | OR    | p-value | 95% CI         |
|--------------------------------|-------|---------|----------------|
| procedure volume <50           | 1     |         |                |
| procedure volume 50-99         | 0.929 | 0.886   | 0.339 - 2.5473 |
| procedure volume >=100         | 0.969 | 0.945   | 0.398 - 2.3631 |
| year                           |       |         |                |
| 2008                           | 1     |         |                |
| 2009                           | 1.140 | 0.643   | 0.654 - 1.989  |
| 2010                           | 0.732 | 0.308   | 0.401 - 1.335  |
| 2011                           | 0.678 | 0.211   | 0.369 - 1.246  |
| 2012                           | 0.659 | 0.197   | 0.350 - 1.241  |
| 2013                           | 0.574 | 0.114   | 0.289 - 1.142  |
| 2014                           | 0.759 | 0.426   | 0.385 - 1.496  |
| n_ik_year_50_100#year          |       |         |                |
| procedure volume 50-99 # 2009  | 1.079 | 0.896   | 0.344 - 3.384  |
| procedure volume 50-99 # 2010  | 1.310 | 0.637   | 0.428 - 4.009  |
| procedure volume 50-99 # 2011  | 1.233 | 0.715   | 0.400 - 3.796  |
| procedure volume 50-99 # 2012  | 1.247 | 0.706   | 0.396 - 3.921  |
| procedure volume 50-99 # 2013  | 1.332 | 0.631   | 0.414 - 4.288  |
| procedure volume 50-99 # 2014  | 0.957 | 0.942   | 0.290 - 3.162  |
| procedure volume >=100 # 2009  | 0.779 | 0.649   | 0.265 - 2.287  |
| procedure volume >=100 # 2010  | 1.134 | 0.810   | 0.407 - 3.159  |
| procedure volume >=100 # 2011  | 1.640 | 0.331   | 0.606 - 4.440  |
| procedure volume >=100 # 2012  | 1.209 | 0.712   | 0.441 - 3.312  |
| procedure volume >=100 # 2013  | 1.769 | 0.282   | 0.626 - 4.995  |
| procedure volume >=100 # 2014  | 1.099 | 0.857   | 0.393 - 3.076  |
| Female                         | 0.648 | 0.000   | 0.565 - 0.744  |
| Age in years                   | 0.900 | 0.000   | 0.890 - 0.910  |
| Estimated logistic EuroSCORE   | 68461 | 0.000   | 33804 - 138650 |
| Aortic valve stenosis          | 1.278 | 0.067   | 0.983 - 1.663  |
| Combined aortic valve diseases | 1.329 | 0.045   | 1.006 - 1.755  |
| NYHA II                        | 0.949 | 0.675   | 0.744 - 1.211  |
| NYHA III or IV                 | 1.096 | 0.166   | 0.962 - 1.249  |
| CAD                            | 1.011 | 0.875   | 0.885 - 1.154  |
| Hypertension                   | 0.910 | 0.148   | 0.802 - 1.034  |
| Previous MI (within 4 months)  | 0.278 | 0.000   | 0.167 - 0.464  |
| Previous MI (within 1 year)    | 1.246 | 0.491   | 0.667 - 2.328  |
| Previous MI (after 1 year)     | 1.005 | 0.975   | 0.742 - 1.360  |
| Previous CABG                  | 0.857 | 0.350   | 0.620 - 1.184  |
| Previous cardiac surgery       | 0.120 | 0.000   | 0.089 - 0.161  |
| Peripheral vascular disease    | 0.395 | 0.000   | 0.325 - 0.480  |
| Carotid disease                | 0.461 | 0.000   | 0.362 - 0.587  |
| COPD                           | 0.355 | 0.000   | 0.295 - 0.429  |
| Pulmonary hypertension         | 0.198 | 0.000   | 0.164 - 0.239  |
| GFR <15%                       | 0.266 | 0.000   | 0.183 - 0.387  |
| GFR <30%                       | 0.297 | 0.000   | 0.226 - 0.391  |
| Atrial fibrillation            | 1.093 | 0.165   | 0.964 - 1.239  |
| Diabetes                       | 1.079 | 0.260   | 0.945 - 1.231  |

**Second step:** Predicted probabilities are calculated by setting each confounder to its mean value (prediction at the means) using Stata's margins command with application of the atmeans option.

| n_ik_year_50_100#year         | Prob. | p-value | 95% CI        |
|-------------------------------|-------|---------|---------------|
| procedure volume <50 # 2008   | 0.022 | 0.000   | 0.012 - 0.031 |
| procedure volume <50 # 2009   | 0.025 | 0.000   | 0.017 - 0.032 |
| procedure volume <50 # 2010   | 0.016 | 0.000   | 0.010 - 0.022 |
| procedure volume <50 # 2011   | 0.015 | 0.000   | 0.009 - 0.021 |
| procedure volume <50 # 2012   | 0.014 | 0.000   | 0.008 - 0.021 |
| procedure volume <50 # 2013   | 0.013 | 0.000   | 0.006 - 0.019 |
| procedure volume <50 # 2014   | 0.016 | 0.000   | 0.008 - 0.025 |
| procedure volume 50-99 # 2008 | 0.020 | 0.026   | 0.002 - 0.038 |
| procedure volume 50-99 # 2009 | 0.025 | 0.000   | 0.014 - 0.035 |
| procedure volume 50-99 # 2010 | 0.019 | 0.000   | 0.014 - 0.025 |
| procedure volume 50-99 # 2011 | 0.017 | 0.000   | 0.012 - 0.022 |
| procedure volume 50-99 # 2012 | 0.017 | 0.000   | 0.011 - 0.022 |
| procedure volume 50-99 # 2013 | 0.015 | 0.000   | 0.011 - 0.020 |
| procedure volume 50-99 # 2014 | 0.015 | 0.000   | 0.009 - 0.021 |
| procedure volume >=100 # 2008 | 0.021 | 0.009   | 0.005 - 0.037 |
| procedure volume >=100 # 2009 | 0.019 | 0.000   | 0.009 - 0.028 |
| procedure volume >=100 # 2010 | 0.017 | 0.000   | 0.012 - 0.023 |
| procedure volume >=100 # 2011 | 0.023 | 0.000   | 0.019 - 0.028 |
| procedure volume >=100 # 2012 | 0.017 | 0.000   | 0.014 - 0.020 |
| procedure volume >=100 # 2013 | 0.021 | 0.000   | 0.018 - 0.025 |
| procedure volume >=100 # 2014 | 0.018 | 0.000   | 0.015 - 0.020 |

**Third step:** A random effects meta regression (using Stata's command metareg) with time and volume as continuous covariates was applied to the estimated rates.

|               | Coeff  | p-value | 95% CI         |
|---------------|--------|---------|----------------|
| Volume effect | 0.001  | 0.196   | -0.001 - 0.003 |
| Annual change | -0.001 | 0.029   | -0.002 - 0.000 |

**Fourth step:** A second random effects meta regression model was applied including also an interaction term.

|                                | Coeff  | p-value | 95% CI         |
|--------------------------------|--------|---------|----------------|
| Volume effect                  | -1.103 | 0.307   | -3.311 - 1.106 |
| Annual change                  | -0.002 | 0.086   | -0.005 - 0.000 |
| Annual change of volume effect | 0.001  | 0.306   | -0.001 - 0.002 |

Table S4: Results of the logistic regression model, transformation into discrete event probabilities and subsequent meta regressions

**First step:** Logistic regression model on 43,996 TAVI cases with bleeding as dependent variable, an interaction term (n\_ik\_year\_50\_100#year) between categorical time (in years) and volume categories and 22 predefined patient and procedural characteristics as potential confounder.

| n_ik_year_50_100               | OR    | p-value | 95% CI        |
|--------------------------------|-------|---------|---------------|
| procedure volume <50           | 1     |         |               |
| procedure volume 50-99         | 0.806 | 0.366   | 0.506 - 1.286 |
| procedure volume >=100         | 0.485 | 0.006   | 0.291 - 0.811 |
| year                           |       |         |               |
| 2008                           | 1     |         |               |
| 2009                           | 0.942 | 0.677   | 0.711 - 1.248 |
| 2010                           | 0.775 | 0.086   | 0.579 - 1.037 |
| 2011                           | 0.574 | 0.000   | 0.422 - 0.781 |
| 2012                           | 0.502 | 0.000   | 0.363 - 0.696 |
| 2013                           | 0.559 | 0.001   | 0.399 - 0.785 |
| 2014                           | 0.340 | 0.000   | 0.226 - 0.511 |
| n_ik_year_50_100#year          |       |         |               |
| procedure volume 50-99 # 2009  | 0.992 | 0.978   | 0.571 - 1.724 |
| procedure volume 50-99 # 2010  | 1.176 | 0.541   | 0.699 - 1.980 |
| procedure volume 50-99 # 2011  | 1.224 | 0.458   | 0.718 - 2.087 |
| procedure volume 50-99 # 2012  | 1.321 | 0.321   | 0.762 - 2.293 |
| procedure volume 50-99 # 2013  | 0.894 | 0.693   | 0.511 - 1.563 |
| procedure volume 50-99 # 2014  | 1.265 | 0.463   | 0.675 - 2.374 |
| procedure volume >=100 # 2009  | 1.070 | 0.828   | 0.581 - 1.970 |
| procedure volume >=100 # 2010  | 1.078 | 0.799   | 0.605 - 1.920 |
| procedure volume >=100 # 2011  | 2.198 | 0.006   | 1.249 - 3.866 |
| procedure volume >=100 # 2012  | 1.669 | 0.080   | 0.941 - 2.960 |
| procedure volume >=100 # 2013  | 1.371 | 0.286   | 0.768 - 2.447 |
| procedure volume >=100 # 2014  | 1.540 | 0.174   | 0.827 - 2.868 |
| Female                         | 1.096 | 0.032   | 1.008 - 1.193 |
| Age in years                   | 0.982 | 0.000   | 0.974 - 0.990 |
| Estimated logistic EuroSCORE   | 5.813 | 0.000   | 3.386 - 9.979 |
| Aortic valve stenosis          | 0.738 | 0.000   | 0.639 - 0.852 |
| Combined aortic valve diseases | 0.677 | 0.000   | 0.580 - 0.790 |
| NYHA II                        | 0.665 | 0.000   | 0.562 - 0.786 |
| NYHA III or IV                 | 1.313 | 0.000   | 1.216 - 1.418 |
| CAD                            | 1.062 | 0.137   | 0.981 - 1.149 |
| Hypertension                   | 0.798 | 0.000   | 0.741 - 0.861 |
| Previous MI (within 4 months)  | 0.866 | 0.324   | 0.650 - 1.153 |
| Previous MI (within 1 year)    | 1.071 | 0.742   | 0.711 - 1.614 |
| Previous MI (after 1 year)     | 0.869 | 0.137   | 0.721 - 1.046 |
| Previous CABG                  | 0.530 | 0.000   | 0.447 - 0.629 |
| Previous cardiac surgery       | 1.275 | 0.005   | 1.077 - 1.509 |
| Peripheral vascular disease    | 1.255 | 0.000   | 1.118 - 1.409 |
| Carotid disease                | 1.182 | 0.022   | 1.024 - 1.364 |
| COPD                           | 0.998 | 0.969   | 0.896 - 1.111 |
| Pulmonary hypertension         | 0.833 | 0.002   | 0.741 - 0.935 |
| GFR <15%                       | 2.045 | 0.000   | 1.725 - 2.423 |
| GFR <30%                       | 1.446 | 0.000   | 1.240 - 1.685 |
| Atrial fibrillation            | 1.418 | 0.000   | 1.316 - 1.528 |
| Diabetes                       | 0.968 | 0.418   | 0.894 - 1.048 |

**Second step:** Predicted probabilities are calculated by setting each confounder to its mean value (prediction at the means) using Stata's margins command with application of the atmeans option.

| n_ik_year_50_100#year         | Prob. | p-value | 95% CI        |
|-------------------------------|-------|---------|---------------|
| procedure volume <50 # 2008   | 0.134 | 0.000   | 0.108 - 0.161 |
| procedure volume <50 # 2009   | 0.128 | 0.000   | 0.109 - 0.146 |
| procedure volume <50 # 2010   | 0.107 | 0.000   | 0.090 - 0.125 |
| procedure volume <50 # 2011   | 0.082 | 0.000   | 0.066 - 0.097 |
| procedure volume <50 # 2012   | 0.072 | 0.000   | 0.057 - 0.088 |
| procedure volume <50 # 2013   | 0.080 | 0.000   | 0.062 - 0.098 |
| procedure volume <50 # 2014   | 0.050 | 0.000   | 0.034 - 0.066 |
| procedure volume 50-99 # 2008 | 0.111 | 0.000   | 0.071 - 0.151 |
| procedure volume 50-99 # 2009 | 0.105 | 0.000   | 0.082 - 0.128 |
| procedure volume 50-99 # 2010 | 0.102 | 0.000   | 0.089 - 0.116 |
| procedure volume 50-99 # 2011 | 0.081 | 0.000   | 0.069 - 0.093 |
| procedure volume 50-99 # 2012 | 0.077 | 0.000   | 0.064 - 0.090 |
| procedure volume 50-99 # 2013 | 0.059 | 0.000   | 0.049 - 0.069 |
| procedure volume 50-99 # 2014 | 0.051 | 0.000   | 0.039 - 0.063 |
| procedure volume >=100 # 2008 | 0.070 | 0.000   | 0.040 - 0.100 |
| procedure volume >=100 # 2009 | 0.071 | 0.000   | 0.052 - 0.090 |
| procedure volume >=100 # 2010 | 0.059 | 0.000   | 0.048 - 0.070 |
| procedure volume >=100 # 2011 | 0.087 | 0.000   | 0.078 - 0.096 |
| procedure volume >=100 # 2012 | 0.059 | 0.000   | 0.053 - 0.066 |
| procedure volume >=100 # 2013 | 0.055 | 0.000   | 0.049 - 0.060 |
| procedure volume >=100 # 2014 | 0.038 | 0.000   | 0.034 - 0.042 |

**Third step:** A random effects meta regression (using Stata's command metareg) with time and volume as continuous covariates was applied to the estimated rates.

|               | Coeff  | p-value | 95% CI           |
|---------------|--------|---------|------------------|
| Volume effect | -0.011 | 0.001   | -0.016 - -0.0049 |
| Annual change | -0.011 | 0.000   | -0.013 - -0.0083 |

**Fourth step:** A second random effects meta regression model was applied including also an interaction term.

|                                | Coeff    | p-value | 95% CI           |
|--------------------------------|----------|---------|------------------|
| Volume effect                  | -4.84852 | 0.169   | -11.97 - 2.27482 |
| Annual change                  | -0.01589 | 0.001   | -0.024 - -0.0076 |
| Annual change of volume effect | 0.0024   | 0.170   | -0.001 - 0.00595 |



Table S5: Results of the logistic regression model, transformation into discrete event probabilities and subsequent meta regressions

**First step:** Linear regression model on 43,996 TAVI cases with Length of hospital stay as dependent variable, an interaction term (n\_ik\_year\_50\_100#year) between categorical time (in years) and volume categories and 22 predefined patient and procedural characteristics as potential confounder.

| n_ik_year_50_100               | Coeff  | p-value | 95% CI          |
|--------------------------------|--------|---------|-----------------|
| procedure volume <50           | 0      |         |                 |
| procedure volume 50-99         | 2.959  | 0.001   | 1.133 - 4.786   |
| procedure volume >=100         | -4.148 | 0.000   | -5.574 - -2.721 |
| year                           |        |         |                 |
| 2008                           | 0      |         |                 |
| 2009                           | 2.179  | 0.001   | 0.950 - 3.409   |
| 2010                           | 1.472  | 0.019   | 0.247 - 2.697   |
| 2011                           | 0.507  | 0.422   | -0.731 - 1.745  |
| 2012                           | -1.002 | 0.100   | -2.197 - 0.193  |
| 2013                           | 0.382  | 0.580   | -0.970 - 1.734  |
| 2014                           | -0.060 | 0.931   | -1.433 - 1.312  |
| n_ik_year_50_100#year          |        |         |                 |
| procedure volume 50-99 # 2009  | -5.745 | 0.000   | -7.942 - -3.547 |
| procedure volume 50-99 # 2010  | -4.872 | 0.000   | -6.926 - -2.819 |
| procedure volume 50-99 # 2011  | -3.555 | 0.001   | -5.622 - -1.488 |
| procedure volume 50-99 # 2012  | -2.174 | 0.037   | -4.219 - -0.130 |
| procedure volume 50-99 # 2013  | -4.452 | 0.000   | -6.576 - -2.327 |
| procedure volume 50-99 # 2014  | -3.947 | 0.000   | -6.110 - -1.783 |
| procedure volume >=100 # 2009  | 1.066  | 0.242   | -0.721 - 2.853  |
| procedure volume >=100 # 2010  | 0.788  | 0.365   | -0.915 - 2.490  |
| procedure volume >=100 # 2011  | 1.972  | 0.021   | 0.292 - 3.652   |
| procedure volume >=100 # 2012  | 2.929  | 0.000   | 1.302 - 4.557   |
| procedure volume >=100 # 2013  | 0.970  | 0.275   | -0.773 - 2.713  |
| procedure volume >=100 # 2014  | 0.390  | 0.662   | -1.358 - 2.139  |
| Female                         | -0.483 | 0.000   | -0.725 - -0.241 |
| Age in years                   | -0.247 | 0.000   | -0.276 - -0.218 |
| Estimated logistic EuroSCORE   | 25.503 | 0.000   | 23.345 - 27.661 |
| Aortic valve stenosis          | -6.255 | 0.000   | -6.912 - -5.598 |
| Combined aortic valve diseases | -6.592 | 0.000   | -7.263 - -5.921 |
| NYHA II                        | 0.154  | 0.365   | -0.179 - 0.487  |
| NYHA III or IV                 | 2.597  | 0.000   | 2.374 - 2.821   |
| CAD                            | -0.037 | 0.740   | -0.259 - 0.184  |
| Hypertension                   | -0.888 | 0.000   | -1.111 - -0.666 |
| Previous MI (within 4 months)  | -3.355 | 0.000   | -4.175 - -2.534 |
| Previous MI (within 1 year)    | 0.015  | 0.980   | -1.172 - 1.203  |
| Previous MI (after 1 year)     | -0.303 | 0.250   | -0.819 - 0.213  |
| Previous CABG                  | -2.938 | 0.000   | -3.596 - -2.280 |
| Previous cardiac surgery       | -1.710 | 0.000   | -2.405 - -1.015 |
| Peripheral vascular disease    | -0.917 | 0.000   | -1.345 - -0.489 |
| Carotid disease                | -1.110 | 0.000   | -1.614 - -0.606 |
| COPD                           | -0.618 | 0.001   | -0.973 - -0.263 |
| Pulmonary hypertension         | -2.226 | 0.000   | -2.624 - -1.827 |
| GFR <15%                       | 1.941  | 0.000   | 0.958 - 2.923   |
| GFR <30%                       | 0.725  | 0.034   | 0.054 - 1.396   |
| Atrial fibrillation            | 2.575  | 0.000   | 2.365 - 2.785   |
| Diabetes                       | 0.932  | 0.000   | 0.702 - 1.161   |

**Second step:** Marginal means are calculated by setting each confounder to its mean value (prediction at the means) using Stata's margins command with application of the atmeans option.

| n_ik_year_50_100#year         | Coeff  | p-value | 95% CI         |
|-------------------------------|--------|---------|----------------|
| procedure volume <50 # 2008   | 19.184 | 0.000   | 18.241 - 20.13 |
| procedure volume <50 # 2009   | 21.364 | 0.000   | 20.577 - 22.15 |
| procedure volume <50 # 2010   | 20.656 | 0.000   | 19.874 - 21.44 |
| procedure volume <50 # 2011   | 19.691 | 0.000   | 18.890 - 20.49 |
| procedure volume <50 # 2012   | 18.182 | 0.000   | 17.448 - 18.92 |
| procedure volume <50 # 2013   | 19.566 | 0.000   | 18.599 - 20.53 |
| procedure volume <50 # 2014   | 19.124 | 0.000   | 18.128 - 20.12 |
| procedure volume 50-99 # 2008 | 22.144 | 0.000   | 20.579 - 23.71 |
| procedure volume 50-99 # 2009 | 18.578 | 0.000   | 17.650 - 19.51 |
| procedure volume 50-99 # 2010 | 18.743 | 0.000   | 18.221 - 19.27 |
| procedure volume 50-99 # 2011 | 19.095 | 0.000   | 18.554 - 19.64 |
| procedure volume 50-99 # 2012 | 18.967 | 0.000   | 18.413 - 19.52 |
| procedure volume 50-99 # 2013 | 18.074 | 0.000   | 17.576 - 18.57 |
| procedure volume 50-99 # 2014 | 18.137 | 0.000   | 17.545 - 18.73 |
| procedure volume >=100 # 2008 | 15.036 | 0.000   | 13.964 - 16.11 |
| procedure volume >=100 # 2009 | 18.281 | 0.000   | 17.543 - 19.02 |
| procedure volume >=100 # 2010 | 17.296 | 0.000   | 16.791 - 17.8  |
| procedure volume >=100 # 2011 | 17.515 | 0.000   | 17.137 - 17.89 |
| procedure volume >=100 # 2012 | 16.964 | 0.000   | 16.696 - 17.23 |
| procedure volume >=100 # 2013 | 16.389 | 0.000   | 16.136 - 16.64 |
| procedure volume >=100 # 2014 | 15.366 | 0.000   | 15.179 - 15.55 |

**Third step:** A random effects meta regression (using Stata's command metareg) with time and volume as continuous covariates was applied to the estimated means.

|               | Coeff  | p-value | 95% CI           |
|---------------|--------|---------|------------------|
| Volume effect | -1.488 | 0.000   | -2.021 - -0.9555 |
| Annual change | -0.269 | 0.029   | -0.507 - -0.0307 |

**Fourth step:** A second random effects meta regression model was applied including also an interaction term.

|                                | Coeff    | p-value | 95% CI           |
|--------------------------------|----------|---------|------------------|
| Volume effect                  | 22.5075  | 0.935   | -554.1 - 599.146 |
| Annual change                  | -0.23991 | 0.452   | -0.898 - 0.41837 |
| Annual change of volume effect | -0.01193 | 0.931   | -0.299 - 0.2748  |

Table S6: Results of the logistic regression model, transformation into discrete event probabilities and subsequent meta regressions

**First step:** Linear regression model on 43,996 TAVI cases with reimbursement as dependent variable, an interaction term (n\_ik\_year\_50\_100#year) between categorical time (in years) and volume categories and 22 predefined patient and procedural characteristics as potential confounder.

| n_ik_year_50_100               | Coeff   | p-value | 95% CI            |
|--------------------------------|---------|---------|-------------------|
| procedure volume <50           | 0       |         |                   |
| procedure volume 50-99         | -905.1  | 0.024   | -1689.5 - -120.7  |
| procedure volume >=100         | -1792.9 | 0.000   | -2614.4 - -971.4  |
| year                           |         |         |                   |
| 2010                           | 0       |         |                   |
| 2011                           | -1104.3 | 0.026   | -2078.5 - -130.1  |
| 2012                           | -1872.9 | 0.000   | -2810.5 - -935.4  |
| 2013                           | -1339.7 | 0.007   | -2316.5 - -362.9  |
| 2014                           | -1240.5 | 0.015   | -2235.4 - -245.5  |
| n_ik_year_50_100#year          |         |         |                   |
| procedure volume 50-99 # 2011  | 349.5   | 0.545   | -783.6 - 1482.5   |
| procedure volume 50-99 # 2012  | 598.9   | 0.269   | -464.0 - 1661.8   |
| procedure volume 50-99 # 2013  | -162.6  | 0.775   | -1276.2 - 950.9   |
| procedure volume 50-99 # 2014  | -51.3   | 0.928   | -1159.3 - 1056.7  |
| procedure volume >=100 # 2011  | 994.4   | 0.082   | -127.8 - 2116.7   |
| procedure volume >=100 # 2012  | 994.3   | 0.063   | -55.5 - 2044.2    |
| procedure volume >=100 # 2013  | 614.5   | 0.267   | -471.3 - 1700.4   |
| procedure volume >=100 # 2014  | 803.0   | 0.150   | -289.3 - 1895.4   |
| Female                         | -816.4  | 0.000   | -1022.5 - -610.4  |
| Age in years                   | -134.0  | 0.000   | -159.5 - -108.6   |
| Estimated logistic EuroSCORE   | 9498.4  | 0.000   | 7514.7 - 11482.1  |
| Aortic valve stenosis          | -1480.8 | 0.000   | -2097.4 - -864.3  |
| Combined aortic valve diseases | -1671.1 | 0.000   | -2296.6 - -1045.6 |
| NYHA II                        | -420.2  | 0.001   | -665.2 - -175.3   |
| NYHA III or IV                 | 686.8   | 0.000   | 501.3 - 872.2     |
| CAD                            | 133.6   | 0.153   | -49.7 - 316.8     |
| Hypertension                   | -427.8  | 0.000   | -614.4 - -241.3   |
| Previous MI (within 4 months)  | -1677.0 | 0.000   | -2134.6 - -1219.4 |
| Previous MI (within 1 year)    | 295.6   | 0.574   | -733.9 - 1325.2   |
| Previous MI (after 1 year)     | -483.1  | 0.009   | -843.2 - -123.0   |
| Previous CABG                  | -1118.8 | 0.000   | -1687.9 - -549.8  |
| Previous cardiac surgery       | -574.4  | 0.061   | -1174.8 - 25.9    |
| Peripheral vascular disease    | 86.9    | 0.649   | -287.8 - 461.7    |
| Carotid disease                | -365.0  | 0.106   | -807.3 - 77.3     |
| COPD                           | -0.6    | 0.997   | -318.6 - 317.4    |
| Pulmonary hypertension         | -951.6  | 0.000   | -1302.7 - -600.4  |
| GFR <15%                       | 1849.2  | 0.000   | 921.0 - 2777.4    |
| GFR <30%                       | 322.0   | 0.258   | -235.7 - 879.6    |
| Atrial fibrillation            | 913.0   | 0.000   | 741.8 - 1084.1    |
| Diabetes                       | 223.8   | 0.020   | 34.7 - 412.9      |

**Second step:** Marginal means are calculated by setting each confounder to its mean value (prediction at the means) using Stata's margins command with application of the atmeans option.

| n_ik_year_50_100#year         | Coeff   | p-value | 95% CI            |
|-------------------------------|---------|---------|-------------------|
| procedure volume <50 # 2010   | 36999.8 | 0.000   | 36302.5 - 37697.1 |
| procedure volume <50 # 2011   | 35895.5 | 0.000   | 35214.3 - 36576.7 |
| procedure volume <50 # 2012   | 35126.9 | 0.000   | 34499.5 - 35754.2 |
| procedure volume <50 # 2013   | 35660.1 | 0.000   | 34979.4 - 36340.7 |
| procedure volume <50 # 2014   | 35759.3 | 0.000   | 35049.7 - 36469.0 |
| procedure volume 50-99 # 2010 | 36094.7 | 0.000   | 35738.1 - 36451.3 |
| procedure volume 50-99 # 2011 | 35339.9 | 0.000   | 34882.3 - 35797.5 |
| procedure volume 50-99 # 2012 | 34820.7 | 0.000   | 34470.7 - 35170.6 |
| procedure volume 50-99 # 2013 | 34592.3 | 0.000   | 34198.2 - 34986.4 |
| procedure volume 50-99 # 2014 | 34803.0 | 0.000   | 34459.0 - 35147.0 |
| procedure volume >=100 # 2010 | 35206.9 | 0.000   | 34775.2 - 35638.7 |
| procedure volume >=100 # 2011 | 35097.1 | 0.000   | 34744.3 - 35449.8 |
| procedure volume >=100 # 2012 | 34328.3 | 0.000   | 34128.7 - 34527.9 |
| procedure volume >=100 # 2013 | 34481.7 | 0.000   | 34285.1 - 34678.4 |
| procedure volume >=100 # 2014 | 34769.5 | 0.000   | 34623.4 - 34915.6 |

**Third step:** A random effects meta regression (using Stata's command metareg) with time and volume as continuous covariates was applied to the estimated means.

|               | Coeff  | p-value | 95% CI          |
|---------------|--------|---------|-----------------|
| Volume effect | -503.8 | 0.005   | -826.4 - -181.2 |
| Annual change | -257.6 | 0.011   | -444.3 - -70.9  |

**Fourth step:** A second random effects meta regression model was applied including also an interaction term.

|                                | Coeff     | p-value | 95% CI               |
|--------------------------------|-----------|---------|----------------------|
| Volume effect                  | -245427.3 | 0.262   | -702076.0 - 211221.4 |
| Annual change                  | -518.0    | 0.050   | -1036.3 - 0.2        |
| Annual change of volume effect | 121.7     | 0.263   | -105.2 - 348.7       |

Table S7: Results of the logistic regression model, transformation into discrete event probabilities and subsequent meta regressions

**First step:** Logistic regression model on 43,996 TAVI cases with ventilation as dependent variable, an interaction term (n\_ik\_year\_50\_100#year) between categorical time (in years) and volume categories and 22 predefined patient and procedural characteristics as potential confounder.

| n_ik_year_50_100               | OR    | p-value | 95% CI         |
|--------------------------------|-------|---------|----------------|
| procedure volume <50           | 1     |         |                |
| procedure volume 50-99         | 0.716 | 0.262   | 0.400 - 1.283  |
| procedure volume >=100         | 0.492 | 0.026   | 0.263 - 0.918  |
| year                           |       |         |                |
| 2008                           | 1     |         |                |
| 2009                           | 0.946 | 0.745   | 0.677 - 1.322  |
| 2010                           | 0.853 | 0.362   | 0.605 - 1.201  |
| 2011                           | 0.765 | 0.135   | 0.539 - 1.086  |
| 2012                           | 0.664 | 0.029   | 0.459 - 0.959  |
| 2013                           | 0.623 | 0.018   | 0.420 - 0.923  |
| 2014                           | 0.532 | 0.004   | 0.345 - 0.819  |
| n_ik_year_50_100#year          |       |         |                |
| procedure volume 50-99 # 2009  | 1.079 | 0.827   | 0.544 - 2.141  |
| procedure volume 50-99 # 2010  | 1.382 | 0.322   | 0.729 - 2.622  |
| procedure volume 50-99 # 2011  | 1.43  | 0.277   | 0.751 - 2.723  |
| procedure volume 50-99 # 2012  | 1.096 | 0.789   | 0.561 - 2.142  |
| procedure volume 50-99 # 2013  | 0.929 | 0.833   | 0.469 - 1.841  |
| procedure volume 50-99 # 2014  | 1.016 | 0.967   | 0.489 - 2.111  |
| procedure volume >=100 # 2009  | 1.732 | 0.131   | 0.848 - 3.537  |
| procedure volume >=100 # 2010  | 1.232 | 0.555   | 0.616 - 2.462  |
| procedure volume >=100 # 2011  | 1.914 | 0.059   | 0.975 - 3.758  |
| procedure volume >=100 # 2012  | 1.624 | 0.163   | 0.822 - 3.210  |
| procedure volume >=100 # 2013  | 1.636 | 0.165   | 0.817 - 3.277  |
| procedure volume >=100 # 2014  | 1.358 | 0.402   | 0.664 - 2.776  |
| Female                         | 0.713 | 0.000   | 0.651 - 0.781  |
| Age in years                   | 0.959 | 0.000   | 0.951 - 0.968  |
| Estimated logistic EuroSCORE   | 13.81 | 0.000   | 7.797 - 24.464 |
| Aortic valve stenosis          | 0.722 | 0.000   | 0.618 - 0.843  |
| Combined aortic valve diseases | 0.663 | 0.000   | 0.561 - 0.783  |
| NYHA II                        | 0.498 | 0.000   | 0.404 - 0.614  |
| NYHA III or IV                 | 1.485 | 0.000   | 1.364 - 1.617  |
| CAD                            | 1.094 | 0.044   | 1.002 - 1.193  |
| Hypertension                   | 0.697 | 0.000   | 0.642 - 0.757  |
| Previous MI (within 4 months)  | 0.804 | 0.163   | 0.591 - 1.093  |
| Previous MI (within 1 year)    | 0.796 | 0.358   | 0.490 - 1.294  |
| Previous MI (after 1 year)     | 0.897 | 0.268   | 0.740 - 1.087  |
| Previous CABG                  | 0.675 | 0.000   | 0.557 - 0.816  |
| Previous cardiac surgery       | 0.848 | 0.091   | 0.701 - 1.026  |
| Peripheral vascular disease    | 1.198 | 0.004   | 1.060 - 1.353  |
| Carotid disease                | 0.855 | 0.061   | 0.725 - 1.007  |
| COPD                           | 1.211 | 0.001   | 1.085 - 1.351  |
| Pulmonary hypertension         | 0.758 | 0.000   | 0.669 - 0.858  |
| GFR <15%                       | 1.364 | 0.001   | 1.129 - 1.647  |
| GFR <30%                       | 1.252 | 0.008   | 1.059 - 1.479  |
| Atrial fibrillation            | 1.553 | 0.000   | 1.430 - 1.687  |
| Diabetes                       | 1.138 | 0.003   | 1.045 - 1.239  |

**Second step:** Predicted probabilities are calculated by setting each confounder to its mean value (prediction at the means) using Stata's margins command with application of the atmeans option.

| n_ik_year_50_100#year         | Prob. | p-value | 95% CI        |
|-------------------------------|-------|---------|---------------|
| procedure volume <50 # 2008   | 0.086 | 0.000   | 0.065 - 0.107 |
| procedure volume <50 # 2009   | 0.082 | 0.000   | 0.067 - 0.096 |
| procedure volume <50 # 2010   | 0.074 | 0.000   | 0.060 - 0.089 |
| procedure volume <50 # 2011   | 0.067 | 0.000   | 0.053 - 0.081 |
| procedure volume <50 # 2012   | 0.059 | 0.000   | 0.045 - 0.073 |
| procedure volume <50 # 2013   | 0.055 | 0.000   | 0.040 - 0.070 |
| procedure volume <50 # 2014   | 0.048 | 0.000   | 0.032 - 0.063 |
| procedure volume 50-99 # 2008 | 0.063 | 0.000   | 0.033 - 0.094 |
| procedure volume 50-99 # 2009 | 0.064 | 0.000   | 0.046 - 0.083 |
| procedure volume 50-99 # 2010 | 0.074 | 0.000   | 0.062 - 0.085 |
| procedure volume 50-99 # 2011 | 0.069 | 0.000   | 0.058 - 0.079 |
| procedure volume 50-99 # 2012 | 0.047 | 0.000   | 0.037 - 0.057 |
| procedure volume 50-99 # 2013 | 0.038 | 0.000   | 0.030 - 0.045 |
| procedure volume 50-99 # 2014 | 0.035 | 0.000   | 0.025 - 0.045 |
| procedure volume >=100 # 2008 | 0.044 | 0.000   | 0.020 - 0.068 |
| procedure volume >=100 # 2009 | 0.070 | 0.000   | 0.052 - 0.089 |
| procedure volume >=100 # 2010 | 0.046 | 0.000   | 0.037 - 0.056 |
| procedure volume >=100 # 2011 | 0.063 | 0.000   | 0.056 - 0.071 |
| procedure volume >=100 # 2012 | 0.047 | 0.000   | 0.042 - 0.053 |
| procedure volume >=100 # 2013 | 0.045 | 0.000   | 0.040 - 0.050 |
| procedure volume >=100 # 2014 | 0.032 | 0.000   | 0.029 - 0.036 |

**Third step:** A random effects meta regression (using Stata's command metareg) with time and volume as continuous covariates was applied to the estimated rates.

|               | Coeff  | p-value | 95% CI          |
|---------------|--------|---------|-----------------|
| Volume effect | -0.010 | 0.004   | -0.016 - -0.004 |
| Annual change | -0.004 | 0.002   | -0.007 - -0.002 |

**Fourth step:** A second random effects meta regression model was applied including also an interaction term.

|                                | Coeff  | p-value | 95% CI           |
|--------------------------------|--------|---------|------------------|
| Volume effect                  | -6.084 | 0.040   | -11.870 - -0.299 |
| Annual change                  | -0.011 | 0.004   | -0.018 - -0.004  |
| Annual change of volume effect | 0.003  | 0.041   | 0.000 - 0.006    |

**The RECORD statement – checklist of items, extended from the STROBE statement, that should be reported in observational studies using routinely collected health data.**

|                           | Item No. | STROBE items                                                                                                                                                                               | Location in manuscript where items are reported | RECORD items                                                                                                                                                                                                                                                                                                                                                                                                                                | Location in manuscript where items are reported |
|---------------------------|----------|--------------------------------------------------------------------------------------------------------------------------------------------------------------------------------------------|-------------------------------------------------|---------------------------------------------------------------------------------------------------------------------------------------------------------------------------------------------------------------------------------------------------------------------------------------------------------------------------------------------------------------------------------------------------------------------------------------------|-------------------------------------------------|
| <b>Title and abstract</b> |          |                                                                                                                                                                                            |                                                 |                                                                                                                                                                                                                                                                                                                                                                                                                                             |                                                 |
|                           | 1        | (a) Indicate the study's design with a commonly used term in the title or the abstract (b) Provide in the abstract an informative and balanced summary of what was done and what was found | p1-2                                            | RECORD 1.1: The type of data used should be specified in the title or abstract. When possible, the name of the databases used should be included.<br><br>RECORD 1.2: If applicable, the geographic region and timeframe within which the study took place should be reported in the title or abstract.<br><br>RECORD 1.3: If linkage between databases was conducted for the study, this should be clearly stated in the title or abstract. | R(ecord)1.1: p1<br>R1.2: p1-2<br>R1.3: n/a      |
| <b>Introduction</b>       |          |                                                                                                                                                                                            |                                                 |                                                                                                                                                                                                                                                                                                                                                                                                                                             |                                                 |
| Background rationale      | 2        | Explain the scientific background and rationale for the investigation being reported                                                                                                       | p5                                              |                                                                                                                                                                                                                                                                                                                                                                                                                                             |                                                 |
| Objectives                | 3        | State specific objectives, including any prespecified hypotheses                                                                                                                           | p5                                              |                                                                                                                                                                                                                                                                                                                                                                                                                                             |                                                 |
| <b>Methods</b>            |          |                                                                                                                                                                                            |                                                 |                                                                                                                                                                                                                                                                                                                                                                                                                                             |                                                 |
| Study Design              | 4        | Present key elements of study design early in the paper                                                                                                                                    | p6-9                                            |                                                                                                                                                                                                                                                                                                                                                                                                                                             |                                                 |
| Setting                   | 5        | Describe the setting, locations, and relevant dates, including periods of recruitment, exposure, follow-up, and data collection                                                            | p6                                              |                                                                                                                                                                                                                                                                                                                                                                                                                                             |                                                 |
| Participants              | 6        | (a) <i>Cohort study</i> - Give the eligibility criteria, and the                                                                                                                           | p6                                              | RECORD 6.1: The methods of study population selection (such as codes or                                                                                                                                                                                                                                                                                                                                                                     | R6.1: p6<br>R6.2, 6.3: n/a                      |

|                              |    |                                                                                                                                                                                                                                                                                                                                                                                                                                                                                                                                                                                                                                                             |                            |                                                                                                                                                                                                                                                                                                                                                                                                                                                                                                                                                                                                                              |      |
|------------------------------|----|-------------------------------------------------------------------------------------------------------------------------------------------------------------------------------------------------------------------------------------------------------------------------------------------------------------------------------------------------------------------------------------------------------------------------------------------------------------------------------------------------------------------------------------------------------------------------------------------------------------------------------------------------------------|----------------------------|------------------------------------------------------------------------------------------------------------------------------------------------------------------------------------------------------------------------------------------------------------------------------------------------------------------------------------------------------------------------------------------------------------------------------------------------------------------------------------------------------------------------------------------------------------------------------------------------------------------------------|------|
|                              |    | <p>sources and methods of selection of participants. Describe methods of follow-up</p> <p><i>Case-control study</i> - Give the eligibility criteria, and the sources and methods of case ascertainment and control selection. Give the rationale for the choice of cases and controls</p> <p><i>Cross-sectional study</i> - Give the eligibility criteria, and the sources and methods of selection of participants</p> <p><i>(b) Cohort study</i> - For matched studies, give matching criteria and number of exposed and unexposed</p> <p><i>Case-control study</i> - For matched studies, give matching criteria and the number of controls per case</p> |                            | <p>algorithms used to identify subjects) should be listed in detail. If this is not possible, an explanation should be provided.</p> <p>RECORD 6.2: Any validation studies of the codes or algorithms used to select the population should be referenced. If validation was conducted for this study and not published elsewhere, detailed methods and results should be provided.</p> <p>RECORD 6.3: If the study involved linkage of databases, consider use of a flow diagram or other graphical display to demonstrate the data linkage process, including the number of individuals with linked data at each stage.</p> |      |
| Variables                    | 7  | Clearly define all outcomes, exposures, predictors, potential confounders, and effect modifiers. Give diagnostic criteria, if applicable.                                                                                                                                                                                                                                                                                                                                                                                                                                                                                                                   | p6-7                       | RECORD 7.1: A complete list of codes and algorithms used to classify exposures, outcomes, confounders, and effect modifiers should be provided. If these cannot be reported, an explanation should be provided.                                                                                                                                                                                                                                                                                                                                                                                                              | p6-7 |
| Data sources/<br>measurement | 8  | For each variable of interest, give sources of data and details of methods of assessment (measurement). Describe comparability of assessment methods if there is more than one group                                                                                                                                                                                                                                                                                                                                                                                                                                                                        | p6-7, Supplementary tables |                                                                                                                                                                                                                                                                                                                                                                                                                                                                                                                                                                                                                              |      |
| Bias                         | 9  | Describe any efforts to address potential sources of bias                                                                                                                                                                                                                                                                                                                                                                                                                                                                                                                                                                                                   | p6-7, 9                    |                                                                                                                                                                                                                                                                                                                                                                                                                                                                                                                                                                                                                              |      |
| Study size                   | 10 | Explain how the study size was                                                                                                                                                                                                                                                                                                                                                                                                                                                                                                                                                                                                                              | n/a (national cohort)      |                                                                                                                                                                                                                                                                                                                                                                                                                                                                                                                                                                                                                              |      |



|                  |    |                                                                                                                                                                                                                                                                                                                                                 |                                                          |                                                                                                                                                                                                                                                                                                                    |                                                          |
|------------------|----|-------------------------------------------------------------------------------------------------------------------------------------------------------------------------------------------------------------------------------------------------------------------------------------------------------------------------------------------------|----------------------------------------------------------|--------------------------------------------------------------------------------------------------------------------------------------------------------------------------------------------------------------------------------------------------------------------------------------------------------------------|----------------------------------------------------------|
|                  |    |                                                                                                                                                                                                                                                                                                                                                 |                                                          | level, or other data linkage across two or more databases. The methods of linkage and methods of linkage quality evaluation should be provided.                                                                                                                                                                    |                                                          |
| <b>Results</b>   |    |                                                                                                                                                                                                                                                                                                                                                 |                                                          |                                                                                                                                                                                                                                                                                                                    |                                                          |
| Participants     | 13 | (a) Report the numbers of individuals at each stage of the study ( <i>e.g.</i> , numbers potentially eligible, examined for eligibility, confirmed eligible, included in the study, completing follow-up, and analysed)<br>(b) Give reasons for non-participation at each stage.<br>(c) Consider use of a flow diagram                          | n/a (national cohort, administrative data, no follow-up) | RECORD 13.1: Describe in detail the selection of the persons included in the study ( <i>i.e.</i> , study population selection) including filtering based on data quality, data availability and linkage. The selection of included persons can be described in the text and/or by means of the study flow diagram. | n/a (national cohort, administrative data, no follow-up) |
| Descriptive data | 14 | (a) Give characteristics of study participants ( <i>e.g.</i> , demographic, clinical, social) and information on exposures and potential confounders<br>(b) Indicate the number of participants with missing data for each variable of interest<br>(c) <i>Cohort study</i> - summarise follow-up time ( <i>e.g.</i> , average and total amount) | p8                                                       |                                                                                                                                                                                                                                                                                                                    |                                                          |
| Outcome data     | 15 | <i>Cohort study</i> - Report numbers of outcome events or summary measures over time<br><i>Case-control study</i> - Report numbers in each exposure category, or summary measures of exposure<br><i>Cross-sectional study</i> - Report numbers of outcome events or summary measures                                                            | p13                                                      |                                                                                                                                                                                                                                                                                                                    |                                                          |
| Main results     | 16 | (a) Give unadjusted estimates                                                                                                                                                                                                                                                                                                                   | p10-14                                                   |                                                                                                                                                                                                                                                                                                                    |                                                          |

|                   |    |                                                                                                                                                                                                                                                                                                                                                                                   |           |                                                                                                                                                                                                                                                                                                          |          |
|-------------------|----|-----------------------------------------------------------------------------------------------------------------------------------------------------------------------------------------------------------------------------------------------------------------------------------------------------------------------------------------------------------------------------------|-----------|----------------------------------------------------------------------------------------------------------------------------------------------------------------------------------------------------------------------------------------------------------------------------------------------------------|----------|
|                   |    | and, if applicable, confounder-adjusted estimates and their precision (e.g., 95% confidence interval). Make clear which confounders were adjusted for and why they were included<br>(b) Report category boundaries when continuous variables were categorized<br>(c) If relevant, consider translating estimates of relative risk into absolute risk for a meaningful time period |           |                                                                                                                                                                                                                                                                                                          |          |
| Other analyses    | 17 | Report other analyses done—e.g., analyses of subgroups and interactions, and sensitivity analyses                                                                                                                                                                                                                                                                                 | n/a       |                                                                                                                                                                                                                                                                                                          |          |
| <b>Discussion</b> |    |                                                                                                                                                                                                                                                                                                                                                                                   |           |                                                                                                                                                                                                                                                                                                          |          |
| Key results       | 18 | Summarise key results with reference to study objectives                                                                                                                                                                                                                                                                                                                          | p14-15    |                                                                                                                                                                                                                                                                                                          |          |
| Limitations       | 19 | Discuss limitations of the study, taking into account sources of potential bias or imprecision. Discuss both direction and magnitude of any potential bias                                                                                                                                                                                                                        | p3, 9-10  | RECORD 19.1: Discuss the implications of using data that were not created or collected to answer the specific research question(s). Include discussion of misclassification bias, unmeasured confounding, missing data, and changing eligibility over time, as they pertain to the study being reported. | p3, 9-10 |
| Interpretation    | 20 | Give a cautious overall interpretation of results considering objectives, limitations, multiplicity of analyses, results from similar studies, and other relevant evidence                                                                                                                                                                                                        | p 14-17   |                                                                                                                                                                                                                                                                                                          |          |
| Generalisability  | 21 | Discuss the generalisability (external validity) of the study results                                                                                                                                                                                                                                                                                                             | p3, 14-17 |                                                                                                                                                                                                                                                                                                          |          |



| Other Information                                         |    |                                                                                                                                                               |    |                                                                                                                                                          |                                                                      |
|-----------------------------------------------------------|----|---------------------------------------------------------------------------------------------------------------------------------------------------------------|----|----------------------------------------------------------------------------------------------------------------------------------------------------------|----------------------------------------------------------------------|
| Funding                                                   | 22 | Give the source of funding and the role of the funders for the present study and, if applicable, for the original study on which the present article is based | p4 |                                                                                                                                                          |                                                                      |
| Accessibility of protocol, raw data, and programming code |    | ..                                                                                                                                                            |    | RECORD 22.1: Authors should provide information on how to access any supplemental information such as the study protocol, raw data, or programming code. | Access to public dataset: p6<br>Further data:<br>Supplemental tables |

\*Reference: Benchimol EI, Smeeth L, Guttman A, Harron K, Moher D, Petersen I, Sørensen HT, von Elm E, Langan SM, the RECORD Working Committee. The REporting of studies Conducted using Observational Routinely-collected health Data (RECORD) Statement. *PLoS Medicine* 2015; in press.

\*Checklist is protected under Creative Commons Attribution ([CC BY](https://creativecommons.org/licenses/by/4.0/)) license.
