# Supplementary material for: Volume–outcome relationship in transcatheter aortic valve implantations in Germany 2008–2014: a secondary data analysis of electronic health records
Source: PubMed Central journal article supplement — BMJ Open. 2018 Jul 28;8(7):e020204. doi: 10.1136/bmjopen-2017-020204 (PMC6067393; doi:10.1136/bmjopen-2017-020204), 2018-07-28
Supplement: bmjopen-2017-020204supp001.pdf [file bmjopen-2017-020204supp001.pdf]

Table S1: Diagnosis and procedure codes used for this analysis

| OPS codes                            |                                                  |
|--------------------------------------|--------------------------------------------------|
| 5-351.0*                             | Surgical aortic valve replacement                |
| 5-35a.0*                             | Transcatheter aortic valve replacement           |
| 5-361.*, 5-362.*, 5-363.*            | Coronary artery bypass graft                     |
| 5-351.1*, 5-351.2*, 5-353.1, 5-353.2 | Surgical mitral valve replacement/reconstruction |
| 5-351.4*                             | Surgical tricuspid valve replacement             |
| 5-377.0 et seqq.                     | Permanent pacemaker implantation                 |
| 8-800.7*<br>since 2010:<br>8-800.c*  | Transfusion of RBC                               |

| Diagnosis                          |                                                                                                                                   |
|------------------------------------|-----------------------------------------------------------------------------------------------------------------------------------|
| I35.0, I06.0                       | Aortic valve stenosis (degenerative/rheumatic)                                                                                    |
| I35.2, I06.2                       | Combined aortic valve diseases (degenerative/rheumatic)                                                                           |
| I50.1*                             | Left ventricular congestive heart failure ( <i>according to NYHA classes</i> )                                                    |
| I10*                               | Arterial Hypertension                                                                                                             |
| I25.11, I25.12, I25.13             | Coronary artery disease                                                                                                           |
| I25.20, I25.21, I25.22             | Previous myocardial infarction ( <i>within 4 months/1 year/after 1 year</i> )                                                     |
| Z95.1                              | Previous coronary artery bypass graft                                                                                             |
| Z95.1 – Z95.4                      | Previous cardiac surgery                                                                                                          |
| I70.20-I70.25, I70.8, I70.9, I73.9 | Peripheral vascular disease                                                                                                       |
| I65.2                              | Carotid disease                                                                                                                   |
| I21*                               | Acute myocardial infarction ( <i>within the last 28 days</i> )                                                                    |
| J44*                               | Chronic obstructive pulmonary disease                                                                                             |
| I27*                               | Pulmonary hypertension                                                                                                            |
| N18*                               | Renal disease                                                                                                                     |
| N17*                               | Acute kidney injury                                                                                                               |
| I48.1*                             | Atrial fibrillation                                                                                                               |
| E10* - E14*                        | Diabetes                                                                                                                          |
| I63*, I64                          | Stroke or cerebral infarction incl. occlusion and stenosis of cerebral and precerebral arteries, resulting in cerebral infarction |

Table S2: Results of the logistic regression model, transformation into discrete event probabilities and subsequent meta regressions

**First step:** Logistic regression model on 43,996 TAVI cases with in-hospital mortality as dependent variable, an interaction term (n\_ik\_year\_50\_100#year) between categorical time (in years) and volume categories and 22 predefined patient and procedural characteristics as potential confounder.

| n_ik_year_50_100               | OR    | p-value | 95% CI        |
|--------------------------------|-------|---------|---------------|
| procedure volume <50           | 1     |         |               |
| procedure volume 50-99         | 0.989 | 0.98    | 0.437 - 2.241 |
| procedure volume >=100         | 0.668 | 0.004   | 0.506 - 0.882 |
| year                           |       |         |               |
| 2008                           | 1     |         |               |
| 2009                           | 0.929 | 0.671   | 0.661 - 1.305 |
| 2010                           | 0.844 | 0.376   | 0.579 - 1.229 |
| 2011                           | 0.686 | 0.032   | 0.486 - 0.968 |
| 2012                           | 0.525 | 0.004   | 0.340 - 0.812 |
| 2013                           | 0.465 | 0.001   | 0.302 - 0.718 |
| 2014                           | 0.453 | 0.001   | 0.288 - 0.712 |
| n_ik_year_50_100#year          |       |         |               |
| procedure volume 50-99 # 2009  | 0.929 | 0.874   | 0.376 - 2.298 |
| procedure volume 50-99 # 2010  | 0.909 | 0.828   | 0.384 - 2.151 |
| procedure volume 50-99 # 2011  | 1.105 | 0.822   | 0.464 - 2.631 |
| procedure volume 50-99 # 2012  | 1.280 | 0.597   | 0.512 - 3.202 |
| procedure volume 50-99 # 2013  | 1.141 | 0.781   | 0.452 - 2.877 |
| procedure volume 50-99 # 2014  | 0.908 | 0.845   | 0.346 - 2.385 |
| procedure volume >=100 # 2009  | 1.007 | 0.981   | 0.583 - 1.740 |
| procedure volume >=100 # 2010  | 1.120 | 0.598   | 0.735 - 1.705 |
| procedure volume >=100 # 2011  | 1.260 | 0.223   | 0.869 - 1.827 |
| procedure volume >=100 # 2012  | 1.399 | 0.164   | 0.872 - 2.244 |
| procedure volume >=100 # 2013  | 1.606 | 0.046   | 1.009 - 2.558 |
| procedure volume >=100 # 2014  | 1.100 | 0.687   | 0.692 - 1.749 |
| Female                         | 0.902 | 0.045   | 0.815 - 0.998 |
| Age in years                   | 1.009 | 0.155   | 0.997 - 1.022 |
| Estimated logistic EuroSCORE   | 1.022 | 0.000   | 1.015 - 1.029 |
| Aortic valve stenosis          | 0.636 | 0.000   | 0.504 - 0.802 |
| Combined aortic valve diseases | 0.553 | 0.000   | 0.447 - 0.685 |
| NYHA II                        | 0.551 | 0.000   | 0.423 - 0.717 |
| NYHA III or IV                 | 1.550 | 0.000   | 1.264 - 1.900 |
| CAD                            | 1.034 | 0.517   | 0.934 - 1.144 |
| Hypertension                   | 0.698 | 0.000   | 0.612 - 0.797 |
| Previous MI (within 4 months)  | 0.683 | 0.048   | 0.467 - 0.997 |
| Previous MI (within 1 year)    | 1.042 | 0.881   | 0.608 - 1.785 |
| Previous MI (after 1 year)     | 0.979 | 0.816   | 0.821 - 1.169 |
| Previous CABG                  | 1.017 | 0.884   | 0.809 - 1.278 |
| Previous cardiac surgery       | 0.808 | 0.117   | 0.619 - 1.055 |
| Peripheral vascular disease    | 1.118 | 0.140   | 0.964 - 1.295 |
| Carotid disease                | 0.896 | 0.165   | 0.768 - 1.046 |
| COPD                           | 0.979 | 0.744   | 0.863 - 1.111 |
| Pulmonary hypertension         | 0.852 | 0.021   | 0.744 - 0.976 |
| GFR <15%                       | 1.770 | 0.000   | 1.443 - 2.170 |
| GFR <30%                       | 1.414 | 0.000   | 1.167 - 1.714 |
| Atrial fibrillation            | 1.211 | 0.000   | 1.115 - 1.315 |
| Diabetes                       | 1.024 | 0.640   | 0.926 - 1.133 |

**Second step:** Predicted probabilities are calculated by setting each confounder to its mean value (prediction at the means) using Stata's margins command with application of the atmeans option.

| n_ik_year_50_100#year         | Prob. | p-value | 95% CI        |
|-------------------------------|-------|---------|---------------|
| procedure volume <50 # 2008   | 0.090 | 0.000   | 0.068 - 0.113 |
| procedure volume <50 # 2009   | 0.085 | 0.000   | 0.071 - 0.098 |
| procedure volume <50 # 2010   | 0.077 | 0.000   | 0.059 - 0.095 |
| procedure volume <50 # 2011   | 0.064 | 0.000   | 0.048 - 0.08  |
| procedure volume <50 # 2012   | 0.050 | 0.000   | 0.033 - 0.066 |
| procedure volume <50 # 2013   | 0.044 | 0.000   | 0.029 - 0.059 |
| procedure volume <50 # 2014   | 0.043 | 0.000   | 0.027 - 0.059 |
| procedure volume 50-99 # 2008 | 0.090 | 0.006   | 0.026 - 0.153 |
| procedure volume 50-99 # 2009 | 0.078 | 0.000   | 0.058 - 0.098 |
| procedure volume 50-99 # 2010 | 0.070 | 0.000   | 0.059 - 0.082 |
| procedure volume 50-99 # 2011 | 0.069 | 0.000   | 0.057 - 0.082 |
| procedure volume 50-99 # 2012 | 0.062 | 0.000   | 0.049 - 0.076 |
| procedure volume 50-99 # 2013 | 0.050 | 0.000   | 0.038 - 0.061 |
| procedure volume 50-99 # 2014 | 0.039 | 0.000   | 0.026 - 0.052 |
| procedure volume >=100 # 2008 | 0.062 | 0.000   | 0.060 - 0.064 |
| procedure volume >=100 # 2009 | 0.058 | 0.000   | 0.034 - 0.083 |
| procedure volume >=100 # 2010 | 0.059 | 0.000   | 0.044 - 0.074 |
| procedure volume >=100 # 2011 | 0.054 | 0.000   | 0.047 - 0.061 |
| procedure volume >=100 # 2012 | 0.047 | 0.000   | 0.039 - 0.054 |
| procedure volume >=100 # 2013 | 0.047 | 0.000   | 0.040 - 0.055 |
| procedure volume >=100 # 2014 | 0.032 | 0.000   | 0.028 - 0.036 |

**Third step:** A random effects meta regression (using Stata's command metareg) with time and volume as continuous covariates was applied to the estimated rates.

|               | Coeff  | p-value | 95% CI          |
|---------------|--------|---------|-----------------|
| Volume effect | -0.007 | 0.002   | -0.012 - -0.003 |
| Annual change | -0.006 | 0.000   | -0.008 - -0.004 |

**Fourth step:** A second random effects meta regression model was applied including also an interaction term.

|                                | Coeff  | p-value | 95% CI          |
|--------------------------------|--------|---------|-----------------|
| Volume effect                  | -4.536 | 0.026   | -8.473 - -0.600 |
| Annual change                  | -0.011 | 0.000   | -0.016 - -0.006 |
| Annual change of volume effect | 0.002  | 0.027   | 0.000 - 0.004   |

Table S3: Results of the logistic regression model, transformation into discrete event probabilities and subsequent meta regressions

**First step:** Logistic regression model on 43,996 TAVI cases with stroke as dependent variable, an interaction term (n\_ik\_year\_50\_100#year) between categorical time (in years) and volume categories and 22 predefined patient and procedural characteristics as potential confounder.

| n_ik_year_50_100               | OR    | p-value | 95% CI         |
|--------------------------------|-------|---------|----------------|
| procedure volume <50           | 1     |         |                |
| procedure volume 50-99         | 0.929 | 0.886   | 0.339 - 2.5473 |
| procedure volume >=100         | 0.969 | 0.945   | 0.398 - 2.3631 |
| year                           |       |         |                |
| 2008                           | 1     |         |                |
| 2009                           | 1.140 | 0.643   | 0.654 - 1.989  |
| 2010                           | 0.732 | 0.308   | 0.401 - 1.335  |
| 2011                           | 0.678 | 0.211   | 0.369 - 1.246  |
| 2012                           | 0.659 | 0.197   | 0.350 - 1.241  |
| 2013                           | 0.574 | 0.114   | 0.289 - 1.142  |
| 2014                           | 0.759 | 0.426   | 0.385 - 1.496  |
| n_ik_year_50_100#year          |       |         |                |
| procedure volume 50-99 # 2009  | 1.079 | 0.896   | 0.344 - 3.384  |
| procedure volume 50-99 # 2010  | 1.310 | 0.637   | 0.428 - 4.009  |
| procedure volume 50-99 # 2011  | 1.233 | 0.715   | 0.400 - 3.796  |
| procedure volume 50-99 # 2012  | 1.247 | 0.706   | 0.396 - 3.921  |
| procedure volume 50-99 # 2013  | 1.332 | 0.631   | 0.414 - 4.288  |
| procedure volume 50-99 # 2014  | 0.957 | 0.942   | 0.290 - 3.162  |
| procedure volume >=100 # 2009  | 0.649 | 0.265   | 0.265 - 2.287  |
| procedure volume >=100 # 2010  | 1.134 | 0.810   | 0.407 - 3.159  |
| procedure volume >=100 # 2011  | 1.640 | 0.331   | 0.606 - 4.440  |
| procedure volume >=100 # 2012  | 1.209 | 0.712   | 0.441 - 3.312  |
| procedure volume >=100 # 2013  | 1.769 | 0.282   | 0.626 - 4.995  |
| procedure volume >=100 # 2014  | 1.099 | 0.857   | 0.393 - 3.076  |
| Female                         | 0.648 | 0.000   | 0.565 - 0.744  |
| Age in years                   | 0.900 | 0.000   | 0.890 - 0.910  |
| Estimated logistic EuroSCORE   | 68461 | 0.000   | 33804 - 138650 |
| Aortic valve stenosis          | 1.278 | 0.067   | 0.983 - 1.663  |
| Combined aortic valve diseases | 1.329 | 0.045   | 1.006 - 1.755  |
| NYHA II                        | 0.949 | 0.675   | 0.744 - 1.211  |
| NYHA III or IV                 | 1.096 | 0.166   | 0.962 - 1.249  |
| CAD                            | 1.011 | 0.875   | 0.885 - 1.154  |
| Hypertension                   | 0.910 | 0.148   | 0.802 - 1.034  |
| Previous MI (within 4 months)  | 0.278 | 0.000   | 0.167 - 0.464  |
| Previous MI (within 1 year)    | 1.246 | 0.491   | 0.667 - 2.328  |
| Previous MI (after 1 year)     | 1.005 | 0.975   | 0.742 - 1.360  |
| Previous CABG                  | 0.857 | 0.350   | 0.620 - 1.184  |
| Previous cardiac surgery       | 0.120 | 0.000   | 0.089 - 0.161  |
| Peripheral vascular disease    | 0.395 | 0.000   | 0.325 - 0.480  |
| Carotid disease                | 0.461 | 0.000   | 0.362 - 0.587  |
| COPD                           | 0.355 | 0.000   | 0.295 - 0.429  |
| Pulmonary hypertension         | 0.198 | 0.000   | 0.164 - 0.239  |
| GFR <15%                       | 0.266 | 0.000   | 0.183 - 0.387  |
| GFR <30%                       | 0.297 | 0.000   | 0.226 - 0.391  |
| Atrial fibrillation            | 1.093 | 0.165   | 0.964 - 1.239  |
| Diabetes                       | 1.079 | 0.260   | 0.945 - 1.231  |

**Second step:** Predicted probabilities are calculated by setting each confounder to its mean value (prediction at the means) using Stata's margins command with application of the atmeans option.

| n_ik_year_50_100#year         | Prob. | p-value | 95% CI        |
|-------------------------------|-------|---------|---------------|
| procedure volume <50 # 2008   | 0.022 | 0.000   | 0.012 - 0.031 |
| procedure volume <50 # 2009   | 0.025 | 0.000   | 0.017 - 0.032 |
| procedure volume <50 # 2010   | 0.016 | 0.000   | 0.010 - 0.022 |
| procedure volume <50 # 2011   | 0.015 | 0.000   | 0.009 - 0.021 |
| procedure volume <50 # 2012   | 0.014 | 0.000   | 0.008 - 0.021 |
| procedure volume <50 # 2013   | 0.013 | 0.000   | 0.006 - 0.019 |
| procedure volume <50 # 2014   | 0.016 | 0.000   | 0.008 - 0.025 |
| procedure volume 50-99 # 2008 | 0.020 | 0.026   | 0.002 - 0.038 |
| procedure volume 50-99 # 2009 | 0.025 | 0.000   | 0.014 - 0.035 |
| procedure volume 50-99 # 2010 | 0.019 | 0.000   | 0.014 - 0.025 |
| procedure volume 50-99 # 2011 | 0.017 | 0.000   | 0.012 - 0.022 |
| procedure volume 50-99 # 2012 | 0.017 | 0.000   | 0.011 - 0.022 |
| procedure volume 50-99 # 2013 | 0.015 | 0.000   | 0.011 - 0.020 |
| procedure volume 50-99 # 2014 | 0.015 | 0.000   | 0.009 - 0.021 |
| procedure volume >=100 # 2008 | 0.021 | 0.009   | 0.005 - 0.037 |
| procedure volume >=100 # 2009 | 0.019 | 0.000   | 0.009 - 0.028 |
| procedure volume >=100 # 2010 | 0.017 | 0.000   | 0.012 - 0.023 |
| procedure volume >=100 # 2011 | 0.023 | 0.000   | 0.019 - 0.028 |
| procedure volume >=100 # 2012 | 0.017 | 0.000   | 0.014 - 0.020 |
| procedure volume >=100 # 2013 | 0.021 | 0.000   | 0.018 - 0.025 |
| procedure volume >=100 # 2014 | 0.018 | 0.000   | 0.015 - 0.020 |

**Third step:** A random effects meta regression (using Stata's command metareg) with time and volume as continuous covariates was applied to the estimated rates.

|               | Coeff  | p-value | 95% CI         |
|---------------|--------|---------|----------------|
| Volume effect | 0.001  | 0.196   | -0.001 - 0.003 |
| Annual change | -0.001 | 0.029   | -0.002 - 0.000 |

**Fourth step:** A second random effects meta regression model was applied including also an interaction term.

|                                | Coeff  | p-value | 95% CI         |
|--------------------------------|--------|---------|----------------|
| Volume effect                  | -1.103 | 0.307   | -3.311 - 1.106 |
| Annual change                  | -0.002 | 0.086   | -0.005 - 0.000 |
| Annual change of volume effect | 0.001  | 0.306   | -0.001 - 0.002 |

Table S4: Results of the logistic regression model, transformation into discrete event probabilities and subsequent meta regressions

**First step:** Logistic regression model on 43,996 TAVI cases with bleeding as dependent variable, an interaction term (n\_ik\_year\_50\_100#year) between categorical time (in years) and volume categories and 22 predefined patient and procedural characteristics as potential confounder.

| n_ik_year_50_100               | OR    | p-value | 95% CI        |
|--------------------------------|-------|---------|---------------|
| procedure volume <50           | 1     |         |               |
| procedure volume 50-99         | 0.806 | 0.366   | 0.506 - 1.286 |
| procedure volume >=100         | 0.485 | 0.006   | 0.291 - 0.811 |
| year                           |       |         |               |
| 2008                           | 1     |         |               |
| 2009                           | 0.942 | 0.677   | 0.711 - 1.248 |
| 2010                           | 0.775 | 0.086   | 0.579 - 1.037 |
| 2011                           | 0.574 | 0.000   | 0.422 - 0.781 |
| 2012                           | 0.502 | 0.000   | 0.363 - 0.696 |
| 2013                           | 0.559 | 0.001   | 0.399 - 0.785 |
| 2014                           | 0.340 | 0.000   | 0.226 - 0.511 |
| n_ik_year_50_100#year          |       |         |               |
| procedure volume 50-99 # 2009  | 0.992 | 0.978   | 0.571 - 1.724 |
| procedure volume 50-99 # 2010  | 1.176 | 0.541   | 0.699 - 1.980 |
| procedure volume 50-99 # 2011  | 1.224 | 0.458   | 0.718 - 2.087 |
| procedure volume 50-99 # 2012  | 1.321 | 0.321   | 0.762 - 2.293 |
| procedure volume 50-99 # 2013  | 0.894 | 0.693   | 0.511 - 1.563 |
| procedure volume 50-99 # 2014  | 1.265 | 0.463   | 0.675 - 2.374 |
| procedure volume >=100 # 2009  | 1.070 | 0.828   | 0.581 - 1.970 |
| procedure volume >=100 # 2010  | 1.078 | 0.799   | 0.605 - 1.920 |
| procedure volume >=100 # 2011  | 2.198 | 0.006   | 1.249 - 3.866 |
| procedure volume >=100 # 2012  | 1.669 | 0.080   | 0.941 - 2.960 |
| procedure volume >=100 # 2013  | 1.371 | 0.286   | 0.768 - 2.447 |
| procedure volume >=100 # 2014  | 1.540 | 0.174   | 0.827 - 2.868 |
| Female                         | 1.096 | 0.032   | 1.008 - 1.193 |
| Age in years                   | 0.982 | 0.000   | 0.974 - 0.990 |
| Estimated logistic EuroSCORE   | 5.813 | 0.000   | 3.386 - 9.979 |
| Aortic valve stenosis          | 0.738 | 0.000   | 0.639 - 0.852 |
| Combined aortic valve diseases | 0.677 | 0.000   | 0.580 - 0.790 |
| NYHA II                        | 0.665 | 0.000   | 0.562 - 0.786 |
| NYHA III or IV                 | 1.313 | 0.000   | 1.216 - 1.418 |
| CAD                            | 1.062 | 0.137   | 0.981 - 1.149 |
| Hypertension                   | 0.798 | 0.000   | 0.741 - 0.861 |
| Previous MI (within 4 months)  | 0.866 | 0.324   | 0.650 - 1.153 |
| Previous MI (within 1 year)    | 1.071 | 0.742   | 0.711 - 1.614 |
| Previous MI (after 1 year)     | 0.869 | 0.137   | 0.721 - 1.046 |
| Previous CABG                  | 0.530 | 0.000   | 0.447 - 0.629 |
| Previous cardiac surgery       | 1.275 | 0.005   | 1.077 - 1.509 |
| Peripheral vascular disease    | 1.255 | 0.000   | 1.118 - 1.409 |
| Carotid disease                | 1.182 | 0.022   | 1.024 - 1.364 |
| COPD                           | 0.998 | 0.969   | 0.896 - 1.111 |
| Pulmonary hypertension         | 0.833 | 0.002   | 0.741 - 0.935 |
| GFR <15%                       | 2.045 | 0.000   | 1.725 - 2.423 |
| GFR <30%                       | 1.446 | 0.000   | 1.240 - 1.685 |
| Atrial fibrillation            | 1.418 | 0.000   | 1.316 - 1.528 |
| Diabetes                       | 0.968 | 0.418   | 0.894 - 1.048 |

**Second step:** Predicted probabilities are calculated by setting each confounder to its mean value (prediction at the means) using Stata's margins command with application of the atmeans option.

| n_ik_year_50_100#year         | Prob. | p-value | 95% CI        |
|-------------------------------|-------|---------|---------------|
| procedure volume <50 # 2008   | 0.134 | 0.000   | 0.108 - 0.161 |
| procedure volume <50 # 2009   | 0.128 | 0.000   | 0.109 - 0.146 |
| procedure volume <50 # 2010   | 0.107 | 0.000   | 0.090 - 0.125 |
| procedure volume <50 # 2011   | 0.082 | 0.000   | 0.066 - 0.097 |
| procedure volume <50 # 2012   | 0.072 | 0.000   | 0.057 - 0.088 |
| procedure volume <50 # 2013   | 0.080 | 0.000   | 0.062 - 0.098 |
| procedure volume <50 # 2014   | 0.050 | 0.000   | 0.034 - 0.066 |
| procedure volume 50-99 # 2008 | 0.111 | 0.000   | 0.071 - 0.151 |
| procedure volume 50-99 # 2009 | 0.105 | 0.000   | 0.082 - 0.128 |
| procedure volume 50-99 # 2010 | 0.102 | 0.000   | 0.089 - 0.116 |
| procedure volume 50-99 # 2011 | 0.081 | 0.000   | 0.069 - 0.093 |
| procedure volume 50-99 # 2012 | 0.077 | 0.000   | 0.064 - 0.090 |
| procedure volume 50-99 # 2013 | 0.059 | 0.000   | 0.049 - 0.069 |
| procedure volume 50-99 # 2014 | 0.051 | 0.000   | 0.039 - 0.063 |
| procedure volume >=100 # 2008 | 0.070 | 0.000   | 0.040 - 0.100 |
| procedure volume >=100 # 2009 | 0.071 | 0.000   | 0.052 - 0.090 |
| procedure volume >=100 # 2010 | 0.059 | 0.000   | 0.048 - 0.070 |
| procedure volume >=100 # 2011 | 0.087 | 0.000   | 0.078 - 0.096 |
| procedure volume >=100 # 2012 | 0.059 | 0.000   | 0.053 - 0.066 |
| procedure volume >=100 # 2013 | 0.055 | 0.000   | 0.049 - 0.060 |
| procedure volume >=100 # 2014 | 0.038 | 0.000   | 0.034 - 0.042 |

**Third step:** A random effects meta regression (using Stata's command metareg) with time and volume as continuous covariates was applied to the estimated rates.

|               | Coeff  | p-value | 95% CI           |
|---------------|--------|---------|------------------|
| Volume effect | -0.011 | 0.001   | -0.016 - -0.0049 |
| Annual change | -0.011 | 0.000   | -0.013 - -0.0083 |

**Fourth step:** A second random effects meta regression model was applied including also an interaction term.

|                                | Coeff    | p-value | 95% CI           |
|--------------------------------|----------|---------|------------------|
| Volume effect                  | -4.84852 | 0.169   | -11.97 - 2.27482 |
| Annual change                  | -0.01589 | 0.001   | -0.024 - -0.0076 |
| Annual change of volume effect | 0.0024   | 0.170   | -0.001 - 0.00595 |

Table S5: Results of the logistic regression model, transformation into discrete event probabilities and subsequent meta regressions

**First step:** Linear regression model on 43,996 TAVI cases with Length of hospital stay as dependent variable, an interaction term (n\_ik\_year\_50\_100#year) between categorical time (in years) and volume categories and 22 predefined patient and procedural characteristics as potential confounder.

| n_ik_year_50_100               | Coeff  | p-value | 95% CI          |
|--------------------------------|--------|---------|-----------------|
| procedure volume <50           | 0      |         |                 |
| procedure volume 50-99         | 2.959  | 0.001   | 1.133 - 4.786   |
| procedure volume >=100         | -4.148 | 0.000   | -5.574 - -2.721 |
| year                           |        |         |                 |
| 2008                           | 0      |         |                 |
| 2009                           | 2.179  | 0.001   | 0.950 - 3.409   |
| 2010                           | 1.472  | 0.019   | 0.247 - 2.697   |
| 2011                           | 0.507  | 0.422   | -0.731 - 1.745  |
| 2012                           | -1.002 | 0.100   | -2.197 - 0.193  |
| 2013                           | 0.382  | 0.580   | -0.970 - 1.734  |
| 2014                           | -0.060 | 0.931   | -1.433 - 1.312  |
| n_ik_year_50_100#year          |        |         |                 |
| procedure volume 50-99 # 2009  | -5.745 | 0.000   | -7.942 - -3.547 |
| procedure volume 50-99 # 2010  | -4.872 | 0.000   | -6.926 - -2.819 |
| procedure volume 50-99 # 2011  | -3.555 | 0.001   | -5.622 - -1.488 |
| procedure volume 50-99 # 2012  | -2.174 | 0.037   | -4.219 - -0.130 |
| procedure volume 50-99 # 2013  | -4.452 | 0.000   | -6.576 - -2.327 |
| procedure volume 50-99 # 2014  | -3.947 | 0.000   | -6.110 - -1.783 |
| procedure volume >=100 # 2009  | 1.066  | 0.242   | -0.721 - 2.853  |
| procedure volume >=100 # 2010  | 0.788  | 0.365   | -0.915 - 2.490  |
| procedure volume >=100 # 2011  | 1.972  | 0.021   | 0.292 - 3.652   |
| procedure volume >=100 # 2012  | 2.929  | 0.000   | 1.302 - 4.557   |
| procedure volume >=100 # 2013  | 0.970  | 0.275   | -0.773 - 2.713  |
| procedure volume >=100 # 2014  | 0.390  | 0.662   | -1.358 - 2.139  |
| Female                         | -0.483 | 0.000   | -0.725 - -0.241 |
| Age in years                   | -0.247 | 0.000   | -0.276 - -0.218 |
| Estimated logistic EuroSCORE   | 25.503 | 0.000   | 23.345 - 27.661 |
| Aortic valve stenosis          | -6.255 | 0.000   | -6.912 - -5.598 |
| Combined aortic valve diseases | -6.592 | 0.000   | -7.263 - -5.921 |
| NYHA II                        | 0.154  | 0.365   | -0.179 - 0.487  |
| NYHA III or IV                 | 2.597  | 0.000   | 2.374 - 2.821   |
| CAD                            | -0.037 | 0.740   | -0.259 - 0.184  |
| Hypertension                   | -0.888 | 0.000   | -1.111 - -0.666 |
| Previous MI (within 4 months)  | -3.355 | 0.000   | -4.175 - -2.534 |
| Previous MI (within 1 year)    | 0.015  | 0.980   | -1.172 - 1.203  |
| Previous MI (after 1 year)     | -0.303 | 0.250   | -0.819 - 0.213  |
| Previous CABG                  | -2.938 | 0.000   | -3.596 - -2.280 |
| Previous cardiac surgery       | -1.710 | 0.000   | -2.405 - -1.015 |
| Peripheral vascular disease    | -0.917 | 0.000   | -1.345 - -0.489 |
| Carotid disease                | -1.110 | 0.000   | -1.614 - -0.606 |
| COPD                           | -0.618 | 0.001   | -0.973 - -0.263 |
| Pulmonary hypertension         | -2.226 | 0.000   | -2.624 - -1.827 |
| GFR <15%                       | 1.941  | 0.000   | 0.958 - 2.923   |
| GFR <30%                       | 0.725  | 0.034   | 0.054 - 1.396   |
| Atrial fibrillation            | 2.575  | 0.000   | 2.365 - 2.785   |
| Diabetes                       | 0.932  | 0.000   | 0.702 - 1.161   |

**Second step:** Marginal means are calculated by setting each confounder to its mean value (prediction at the means) using Stata's margins command with application of the atmeans option.

| n_ik_year_50_100#year         | Coeff  | p-value | 95% CI         |
|-------------------------------|--------|---------|----------------|
| procedure volume <50 # 2008   | 19.184 | 0.000   | 18.241 - 20.13 |
| procedure volume <50 # 2009   | 21.364 | 0.000   | 20.577 - 22.15 |
| procedure volume <50 # 2010   | 20.656 | 0.000   | 19.874 - 21.44 |
| procedure volume <50 # 2011   | 19.691 | 0.000   | 18.890 - 20.49 |
| procedure volume <50 # 2012   | 18.182 | 0.000   | 17.448 - 18.92 |
| procedure volume <50 # 2013   | 19.566 | 0.000   | 18.599 - 20.53 |
| procedure volume <50 # 2014   | 19.124 | 0.000   | 18.128 - 20.12 |
| procedure volume 50-99 # 2008 | 22.144 | 0.000   | 20.579 - 23.71 |
| procedure volume 50-99 # 2009 | 18.578 | 0.000   | 17.650 - 19.51 |
| procedure volume 50-99 # 2010 | 18.743 | 0.000   | 18.221 - 19.27 |
| procedure volume 50-99 # 2011 | 19.095 | 0.000   | 18.554 - 19.64 |
| procedure volume 50-99 # 2012 | 18.967 | 0.000   | 18.413 - 19.52 |
| procedure volume 50-99 # 2013 | 18.074 | 0.000   | 17.576 - 18.57 |
| procedure volume 50-99 # 2014 | 18.137 | 0.000   | 17.545 - 18.73 |
| procedure volume >=100 # 2008 | 15.036 | 0.000   | 13.964 - 16.11 |
| procedure volume >=100 # 2009 | 18.281 | 0.000   | 17.543 - 19.02 |
| procedure volume >=100 # 2010 | 17.296 | 0.000   | 16.791 - 17.8  |
| procedure volume >=100 # 2011 | 17.515 | 0.000   | 17.137 - 17.89 |
| procedure volume >=100 # 2012 | 16.964 | 0.000   | 16.696 - 17.23 |
| procedure volume >=100 # 2013 | 16.389 | 0.000   | 16.136 - 16.64 |
| procedure volume >=100 # 2014 | 15.366 | 0.000   | 15.179 - 15.55 |

**Third step:** A random effects meta regression (using Stata's command metareg) with time and volume as continuous covariates was applied to the estimated means.

|               | Coeff  | p-value | 95% CI           |
|---------------|--------|---------|------------------|
| Volume effect | -1.488 | 0.000   | -2.021 - -0.9555 |
| Annual change | -0.269 | 0.029   | -0.507 - -0.0307 |

**Fourth step:** A second random effects meta regression model was applied including also an interaction term.

|                                | Coeff    | p-value | 95% CI           |
|--------------------------------|----------|---------|------------------|
| Volume effect                  | 22.5075  | 0.935   | -554.1 - 599.146 |
| Annual change                  | -0.23991 | 0.452   | -0.898 - 0.41837 |
| Annual change of volume effect | -0.01193 | 0.931   | -0.299 - 0.2748  |

Table S6: Results of the logistic regression model, transformation into discrete event probabilities and subsequent meta regressions

**First step:** Linear regression model on 43,996 TAVI cases with reimbursement as dependent variable, an interaction term (n\_ik\_year\_50\_100#year) between categorical time (in years) and volume categories and 22 predefined patient and procedural characteristics as potential confounder.

| n_ik_year_50_100               | Coeff   | p-value | 95% CI            |
|--------------------------------|---------|---------|-------------------|
| procedure volume <50           | 0       |         |                   |
| procedure volume 50-99         | -905.1  | 0.024   | -1689.5 - -120.7  |
| procedure volume >=100         | -1792.9 | 0.000   | -2614.4 - -971.4  |
| year                           |         |         |                   |
| 2010                           | 0       |         |                   |
| 2011                           | -1104.3 | 0.026   | -2078.5 - -130.1  |
| 2012                           | -1872.9 | 0.000   | -2810.5 - -935.4  |
| 2013                           | -1339.7 | 0.007   | -2316.5 - -362.9  |
| 2014                           | -1240.5 | 0.015   | -2235.4 - -245.5  |
| n_ik_year_50_100#year          |         |         |                   |
| procedure volume 50-99 # 2011  | 349.5   | 0.545   | -783.6 - 1482.5   |
| procedure volume 50-99 # 2012  | 598.9   | 0.269   | -464.0 - 1661.8   |
| procedure volume 50-99 # 2013  | -162.6  | 0.775   | -1276.2 - 950.9   |
| procedure volume 50-99 # 2014  | -51.3   | 0.928   | -1159.3 - 1056.7  |
| procedure volume >=100 # 2011  | 994.4   | 0.082   | -127.8 - 2116.7   |
| procedure volume >=100 # 2012  | 994.3   | 0.063   | -55.5 - 2044.2    |
| procedure volume >=100 # 2013  | 614.5   | 0.267   | -471.3 - 1700.4   |
| procedure volume >=100 # 2014  | 803.0   | 0.150   | -289.3 - 1895.4   |
| Female                         | -816.4  | 0.000   | -1022.5 - -610.4  |
| Age in years                   | -134.0  | 0.000   | -159.5 - -108.6   |
| Estimated logistic EuroSCORE   | 9498.4  | 0.000   | 7514.7 - 11482.1  |
| Aortic valve stenosis          | -1480.8 | 0.000   | -2097.4 - -864.3  |
| Combined aortic valve diseases | -1671.1 | 0.000   | -2296.6 - -1045.6 |
| NYHA II                        | -420.2  | 0.001   | -665.2 - -175.3   |
| NYHA III or IV                 | 686.8   | 0.000   | 501.3 - 872.2     |
| CAD                            | 133.6   | 0.153   | -49.7 - 316.8     |
| Hypertension                   | -427.8  | 0.000   | -614.4 - -241.3   |
| Previous MI (within 4 months)  | -1677.0 | 0.000   | -2134.6 - -1219.4 |
| Previous MI (within 1 year)    | 295.6   | 0.574   | -733.9 - 1325.2   |
| Previous MI (after 1 year)     | -483.1  | 0.009   | -843.2 - -123.0   |
| Previous CABG                  | -1118.8 | 0.000   | -1687.9 - -549.8  |
| Previous cardiac surgery       | -574.4  | 0.061   | -1174.8 - 25.9    |
| Peripheral vascular disease    | 86.9    | 0.649   | -287.8 - 461.7    |
| Carotid disease                | -365.0  | 0.106   | -807.3 - 77.3     |
| COPD                           | -0.6    | 0.997   | -318.6 - 317.4    |
| Pulmonary hypertension         | -951.6  | 0.000   | -1302.7 - -600.4  |
| GFR <15%                       | 1849.2  | 0.000   | 921.0 - 2777.4    |
| GFR <30%                       | 322.0   | 0.258   | -235.7 - 879.6    |
| Atrial fibrillation            | 913.0   | 0.000   | 741.8 - 1084.1    |
| Diabetes                       | 223.8   | 0.020   | 34.7 - 412.9      |

**Second step:** Marginal means are calculated by setting each confounder to its mean value (prediction at the means) using Stata's margins command with application of the atmeans option.

| n_ik_year_50_100#year         | Coeff   | p-value | 95% CI            |
|-------------------------------|---------|---------|-------------------|
| procedure volume <50 # 2010   | 36999.8 | 0.000   | 36302.5 - 37697.1 |
| procedure volume <50 # 2011   | 35895.5 | 0.000   | 35214.3 - 36576.7 |
| procedure volume <50 # 2012   | 35126.9 | 0.000   | 34499.5 - 35754.2 |
| procedure volume <50 # 2013   | 35660.1 | 0.000   | 34979.4 - 36340.7 |
| procedure volume <50 # 2014   | 35759.3 | 0.000   | 35049.7 - 36469.0 |
| procedure volume 50-99 # 2010 | 36094.7 | 0.000   | 35738.1 - 36451.3 |
| procedure volume 50-99 # 2011 | 35339.9 | 0.000   | 34882.3 - 35797.5 |
| procedure volume 50-99 # 2012 | 34820.7 | 0.000   | 34470.7 - 35170.6 |
| procedure volume 50-99 # 2013 | 34592.3 | 0.000   | 34198.2 - 34986.4 |
| procedure volume 50-99 # 2014 | 34803.0 | 0.000   | 34459.0 - 35147.0 |
| procedure volume >=100 # 2010 | 35206.9 | 0.000   | 34775.2 - 35638.7 |
| procedure volume >=100 # 2011 | 35097.1 | 0.000   | 34744.3 - 35449.8 |
| procedure volume >=100 # 2012 | 34328.3 | 0.000   | 34128.7 - 34527.9 |
| procedure volume >=100 # 2013 | 34481.7 | 0.000   | 34285.1 - 34678.4 |
| procedure volume >=100 # 2014 | 34769.5 | 0.000   | 34623.4 - 34915.6 |

**Third step:** A random effects meta regression (using Stata's command metareg) with time and volume as continuous covariates was applied to the estimated means.

|               | Coeff  | p-value | 95% CI          |
|---------------|--------|---------|-----------------|
| Volume effect | -503.8 | 0.005   | -826.4 - -181.2 |
| Annual change | -257.6 | 0.011   | -444.3 - -70.9  |

**Fourth step:** A second random effects meta regression model was applied including also an interaction term.

|                                | Coeff     | p-value | 95% CI               |
|--------------------------------|-----------|---------|----------------------|
| Volume effect                  | -245427.3 | 0.262   | -702076.0 - 211221.4 |
| Annual change                  | -518.0    | 0.050   | -1036.3 - 0.2        |
| Annual change of volume effect | 121.7     | 0.263   | -105.2 - 348.7       |

Table S7: Results of the logistic regression model, transformation into discrete event probabilities and subsequent meta regressions

**First step:** Logistic regression model on 43,996 TAVI cases with ventilation as dependent variable, an interaction term (n\_ik\_year\_50\_100#year) between categorical time (in years) and volume categories and 22 predefined patient and procedural characteristics as potential confounder.

| n_ik_year_50_100               | OR    | p-value | 95% CI         |
|--------------------------------|-------|---------|----------------|
| procedure volume <50           | 1     |         |                |
| procedure volume 50-99         | 0.716 | 0.262   | 0.400 - 1.283  |
| procedure volume >=100         | 0.492 | 0.026   | 0.263 - 0.918  |
| year                           |       |         |                |
| 2008                           | 1     |         |                |
| 2009                           | 0.946 | 0.745   | 0.677 - 1.322  |
| 2010                           | 0.853 | 0.362   | 0.605 - 1.201  |
| 2011                           | 0.765 | 0.135   | 0.539 - 1.086  |
| 2012                           | 0.664 | 0.029   | 0.459 - 0.959  |
| 2013                           | 0.623 | 0.018   | 0.420 - 0.923  |
| 2014                           | 0.532 | 0.004   | 0.345 - 0.819  |
| n_ik_year_50_100#year          |       |         |                |
| procedure volume 50-99 # 2009  | 1.079 | 0.827   | 0.544 - 2.141  |
| procedure volume 50-99 # 2010  | 1.382 | 0.322   | 0.729 - 2.622  |
| procedure volume 50-99 # 2011  | 1.43  | 0.277   | 0.751 - 2.723  |
| procedure volume 50-99 # 2012  | 1.096 | 0.789   | 0.561 - 2.142  |
| procedure volume 50-99 # 2013  | 0.929 | 0.833   | 0.469 - 1.841  |
| procedure volume 50-99 # 2014  | 1.016 | 0.967   | 0.489 - 2.111  |
| procedure volume >=100 # 2009  | 1.732 | 0.131   | 0.848 - 3.537  |
| procedure volume >=100 # 2010  | 1.232 | 0.555   | 0.616 - 2.462  |
| procedure volume >=100 # 2011  | 1.914 | 0.059   | 0.975 - 3.758  |
| procedure volume >=100 # 2012  | 1.624 | 0.163   | 0.822 - 3.210  |
| procedure volume >=100 # 2013  | 1.636 | 0.165   | 0.817 - 3.277  |
| procedure volume >=100 # 2014  | 1.358 | 0.402   | 0.664 - 2.776  |
| Female                         | 0.713 | 0.000   | 0.651 - 0.781  |
| Age in years                   | 0.959 | 0.000   | 0.951 - 0.968  |
| Estimated logistic EuroSCORE   | 13.81 | 0.000   | 7.797 - 24.464 |
| Aortic valve stenosis          | 0.722 | 0.000   | 0.618 - 0.843  |
| Combined aortic valve diseases | 0.663 | 0.000   | 0.561 - 0.783  |
| NYHA II                        | 0.498 | 0.000   | 0.404 - 0.614  |
| NYHA III or IV                 | 1.485 | 0.000   | 1.364 - 1.617  |
| CAD                            | 1.094 | 0.044   | 1.002 - 1.193  |
| Hypertension                   | 0.697 | 0.000   | 0.642 - 0.757  |
| Previous MI (within 4 months)  | 0.804 | 0.163   | 0.591 - 1.093  |
| Previous MI (within 1 year)    | 0.796 | 0.358   | 0.490 - 1.294  |
| Previous MI (after 1 year)     | 0.897 | 0.268   | 0.740 - 1.087  |
| Previous CABG                  | 0.675 | 0.000   | 0.557 - 0.816  |
| Previous cardiac surgery       | 0.848 | 0.091   | 0.701 - 1.026  |
| Peripheral vascular disease    | 1.198 | 0.004   | 1.060 - 1.353  |
| Carotid disease                | 0.855 | 0.061   | 0.725 - 1.007  |
| COPD                           | 1.211 | 0.001   | 1.085 - 1.351  |
| Pulmonary hypertension         | 0.758 | 0.000   | 0.669 - 0.858  |
| GFR <15%                       | 1.364 | 0.001   | 1.129 - 1.647  |
| GFR <30%                       | 1.252 | 0.008   | 1.059 - 1.479  |
| Atrial fibrillation            | 1.553 | 0.000   | 1.430 - 1.687  |
| Diabetes                       | 1.138 | 0.003   | 1.045 - 1.239  |

**Second step:** Predicted probabilities are calculated by setting each confounder to its mean value (prediction at the means) using Stata's margins command with application of the atmeans option.

| n_ik_year_50_100#year         | Prob. | p-value | 95% CI        |
|-------------------------------|-------|---------|---------------|
| procedure volume <50 # 2008   | 0.086 | 0.000   | 0.065 - 0.107 |
| procedure volume <50 # 2009   | 0.082 | 0.000   | 0.067 - 0.096 |
| procedure volume <50 # 2010   | 0.074 | 0.000   | 0.060 - 0.089 |
| procedure volume <50 # 2011   | 0.067 | 0.000   | 0.053 - 0.081 |
| procedure volume <50 # 2012   | 0.059 | 0.000   | 0.045 - 0.073 |
| procedure volume <50 # 2013   | 0.055 | 0.000   | 0.040 - 0.070 |
| procedure volume <50 # 2014   | 0.048 | 0.000   | 0.032 - 0.063 |
| procedure volume 50-99 # 2008 | 0.063 | 0.000   | 0.033 - 0.094 |
| procedure volume 50-99 # 2009 | 0.064 | 0.000   | 0.046 - 0.083 |
| procedure volume 50-99 # 2010 | 0.074 | 0.000   | 0.062 - 0.085 |
| procedure volume 50-99 # 2011 | 0.069 | 0.000   | 0.058 - 0.079 |
| procedure volume 50-99 # 2012 | 0.047 | 0.000   | 0.037 - 0.057 |
| procedure volume 50-99 # 2013 | 0.038 | 0.000   | 0.030 - 0.045 |
| procedure volume 50-99 # 2014 | 0.035 | 0.000   | 0.025 - 0.045 |
| procedure volume >=100 # 2008 | 0.044 | 0.000   | 0.020 - 0.068 |
| procedure volume >=100 # 2009 | 0.070 | 0.000   | 0.052 - 0.089 |
| procedure volume >=100 # 2010 | 0.046 | 0.000   | 0.037 - 0.056 |
| procedure volume >=100 # 2011 | 0.063 | 0.000   | 0.056 - 0.071 |
| procedure volume >=100 # 2012 | 0.047 | 0.000   | 0.042 - 0.053 |
| procedure volume >=100 # 2013 | 0.045 | 0.000   | 0.040 - 0.050 |
| procedure volume >=100 # 2014 | 0.032 | 0.000   | 0.029 - 0.036 |

**Third step:** A random effects meta regression (using Stata's command metareg) with time and volume as continuous covariates was applied to the estimated rates.

|               | Coeff  | p-value | 95% CI          |
|---------------|--------|---------|-----------------|
| Volume effect | -0.010 | 0.004   | -0.016 - -0.004 |
| Annual change | -0.004 | 0.002   | -0.007 - -0.002 |

**Fourth step:** A second random effects meta regression model was applied including also an interaction term.

|                                | Coeff  | p-value | 95% CI           |
|--------------------------------|--------|---------|------------------|
| Volume effect                  | -6.084 | 0.040   | -11.870 - -0.299 |
| Annual change                  | -0.011 | 0.004   | -0.018 - -0.004  |
| Annual change of volume effect | 0.003  | 0.041   | 0.000 - 0.006    |
